# Supplementary material for: Range Expansion of Moose in Arctic Alaska Linked to Warming and Increased Shrub Habitat
Source: PLoS One. 2016 Apr 13;11(4):e0152636. doi: 10.1371/journal.pone.0152636 (PMC4830447; doi:10.1371/journal.pone.0152636)
Supplement: S2 Appendix — (XLSX) [file pone.0152636.s002.xlsx]

## Sheet: NS_Location2_mpi-cham5_1860-200
Year	Month	Temperature_C	Precipitation_mm
1860	Jan	-32.2	9
1860	Feb	-27.7	15
1860	Mar	-27.9	19
1860	Apr	-20	8
1860	May	-4.3	12
1860	Jun	9.4	12
1860	Jul	11.2	38
1860	Aug	9.3	44
1860	Sep	0.7	38
1860	Oct	-13.2	38
1860	Nov	-22.9	13
1860	Dec	-30	22
1861	Jan	-29.6	29
1861	Feb	-22.2	25
1861	Mar	-20.6	26
1861	Apr	-18.7	11
1861	May	-5.5	16
1861	Jun	5.4	44
1861	Jul	9.7	25
1861	Aug	8.9	42
1861	Sep	-0.8	27
1861	Oct	-10.5	26
1861	Nov	-23.7	17
1861	Dec	-34.1	15
1862	Jan	-23.8	29
1862	Feb	-28.3	11
1862	Mar	-31.8	15
1862	Apr	-21.4	7
1862	May	-3.8	16
1862	Jun	8.6	35
1862	Jul	9.9	35
1862	Aug	6.2	38
1862	Sep	-2.5	33
1862	Oct	-12.6	20
1862	Nov	-19.1	49
1862	Dec	-31.4	18
1863	Jan	-24.3	19
1863	Feb	-29.7	28
1863	Mar	-33.8	11
1863	Apr	-18.6	5
1863	May	-5.7	24
1863	Jun	4.9	59
1863	Jul	7.6	47
1863	Aug	7.1	36
1863	Sep	-1.1	21
1863	Oct	-14.7	28
1863	Nov	-29	11
1863	Dec	-30.9	35
1864	Jan	-30.2	11
1864	Feb	-34.3	13
1864	Mar	-33.7	6
1864	Apr	-19.2	8
1864	May	-2.8	27
1864	Jun	7	36
1864	Jul	9.1	51
1864	Aug	11.4	38
1864	Sep	0.8	18
1864	Oct	-11.9	21
1864	Nov	-24.1	14
1864	Dec	-32.7	18
1865	Jan	-32.4	15
1865	Feb	-23.2	25
1865	Mar	-21.3	9
1865	Apr	-18.3	12
1865	May	-5.1	21
1865	Jun	6.8	38
1865	Jul	12.6	39
1865	Aug	8.5	16
1865	Sep	0.6	13
1865	Oct	-12.3	31
1865	Nov	-16.3	44
1865	Dec	-21.6	23
1866	Jan	-22.6	28
1866	Feb	-23.3	35
1866	Mar	-27.4	4
1866	Apr	-17.9	13
1866	May	-2.2	15
1866	Jun	6	34
1866	Jul	9.5	48
1866	Aug	7.3	27
1866	Sep	0.8	28
1866	Oct	-14.5	30
1866	Nov	-26.6	17
1866	Dec	-29.2	13
1867	Jan	-26.7	23
1867	Feb	-30.8	18
1867	Mar	-33	7
1867	Apr	-20	10
1867	May	-5.9	22
1867	Jun	6.8	33
1867	Jul	13.6	25
1867	Aug	12.3	29
1867	Sep	2.6	51
1867	Oct	-6.4	53
1867	Nov	-18.1	34
1867	Dec	-26.7	5
1868	Jan	-28.6	18
1868	Feb	-25.5	23
1868	Mar	-23.9	15
1868	Apr	-16.3	17
1868	May	-2.6	15
1868	Jun	8.4	17
1868	Jul	12.4	23
1868	Aug	9.9	28
1868	Sep	2.8	32
1868	Oct	-14.1	19
1868	Nov	-26.4	15
1868	Dec	-21.3	46
1869	Jan	-31.4	9
1869	Feb	-24.4	41
1869	Mar	-30.1	13
1869	Apr	-16.8	9
1869	May	-5.3	18
1869	Jun	5.6	34
1869	Jul	11.9	48
1869	Aug	7.6	24
1869	Sep	2.2	27
1869	Oct	-13.1	38
1869	Nov	-27.1	7
1869	Dec	-28.5	16
1870	Jan	-34.8	5
1870	Feb	-28.8	10
1870	Mar	-24.4	10
1870	Apr	-16.5	11
1870	May	-1.3	16
1870	Jun	10.6	28
1870	Jul	10.3	33
1870	Aug	7.4	30
1870	Sep	-0.6	41
1870	Oct	-10.9	33
1870	Nov	-18.3	24
1870	Dec	-25.2	25
1871	Jan	-33.3	10
1871	Feb	-29.8	4
1871	Mar	-32.3	12
1871	Apr	-19.8	13
1871	May	-8	7
1871	Jun	6.1	41
1871	Jul	11	37
1871	Aug	7.2	47
1871	Sep	2.1	36
1871	Oct	-10.3	34
1871	Nov	-26	14
1871	Dec	-21.3	27
1872	Jan	-32.4	10
1872	Feb	-29.4	18
1872	Mar	-28.5	9
1872	Apr	-17.5	7
1872	May	-2.1	16
1872	Jun	6.4	36
1872	Jul	9.7	35
1872	Aug	7.6	33
1872	Sep	3.1	36
1872	Oct	-9.6	29
1872	Nov	-17.6	43
1872	Dec	-29.2	37
1873	Jan	-26.6	18
1873	Feb	-36.3	6
1873	Mar	-28.9	16
1873	Apr	-18.5	8
1873	May	-4.9	21
1873	Jun	6	23
1873	Jul	12.1	39
1873	Aug	8	58
1873	Sep	-0.5	42
1873	Oct	-17.5	17
1873	Nov	-24.4	26
1873	Dec	-30	30
1874	Jan	-34.7	8
1874	Feb	-31.1	15
1874	Mar	-33.7	11
1874	Apr	-19.9	5
1874	May	-7.5	21
1874	Jun	6.5	29
1874	Jul	10.1	50
1874	Aug	7.6	44
1874	Sep	1.2	28
1874	Oct	-14.4	14
1874	Nov	-19.1	21
1874	Dec	-30.4	20
1875	Jan	-31.2	16
1875	Feb	-27.8	11
1875	Mar	-35	13
1875	Apr	-18.8	13
1875	May	-5.6	12
1875	Jun	7.2	39
1875	Jul	9.7	37
1875	Aug	7	35
1875	Sep	2.9	58
1875	Oct	-12.2	35
1875	Nov	-26.6	17
1875	Dec	-28	28
1876	Jan	-24.2	27
1876	Feb	-26.6	23
1876	Mar	-21.5	15
1876	Apr	-17.6	13
1876	May	-4.9	20
1876	Jun	7.2	32
1876	Jul	15.2	11
1876	Aug	8.3	16
1876	Sep	4	36
1876	Oct	-14.8	38
1876	Nov	-19.7	24
1876	Dec	-22.6	17
1877	Jan	-31.2	13
1877	Feb	-25.3	6
1877	Mar	-22.3	9
1877	Apr	-18	17
1877	May	-7.4	9
1877	Jun	7.6	26
1877	Jul	12.4	20
1877	Aug	11.2	21
1877	Sep	0.4	33
1877	Oct	-10.3	36
1877	Nov	-16.6	19
1877	Dec	-31.7	14
1878	Jan	-24.3	20
1878	Feb	-34.3	15
1878	Mar	-25.7	25
1878	Apr	-19.3	8
1878	May	-4.6	17
1878	Jun	13.2	35
1878	Jul	13.7	37
1878	Aug	10.8	21
1878	Sep	-2.3	39
1878	Oct	-11.4	36
1878	Nov	-28.6	9
1878	Dec	-32.9	12
1879	Jan	-36.9	5
1879	Feb	-32.8	3
1879	Mar	-34.7	13
1879	Apr	-19.7	18
1879	May	-8.6	8
1879	Jun	5.2	30
1879	Jul	9.7	34
1879	Aug	7.3	37
1879	Sep	1.8	24
1879	Oct	-9.2	31
1879	Nov	-20	12
1879	Dec	-21.5	30
1880	Jan	-24	20
1880	Feb	-28.5	29
1880	Mar	-25.3	23
1880	Apr	-15.2	7
1880	May	-5.4	11
1880	Jun	8.7	35
1880	Jul	11.1	33
1880	Aug	7.8	61
1880	Sep	-2.4	26
1880	Oct	-13.6	52
1880	Nov	-28.9	11
1880	Dec	-26.6	24
1881	Jan	-29.9	10
1881	Feb	-25.2	8
1881	Mar	-20.2	11
1881	Apr	-22.2	6
1881	May	-5.9	11
1881	Jun	6.4	31
1881	Jul	16.4	25
1881	Aug	12.8	17
1881	Sep	3.5	42
1881	Oct	-14.8	25
1881	Nov	-16.1	39
1881	Dec	-23.7	21
1882	Jan	-26.4	8
1882	Feb	-22.7	33
1882	Mar	-26.4	20
1882	Apr	-22.9	5
1882	May	-0.5	13
1882	Jun	11	17
1882	Jul	12.1	40
1882	Aug	9.9	25
1882	Sep	-1.7	49
1882	Oct	-16.9	12
1882	Nov	-24.3	25
1882	Dec	-33	18
1883	Jan	-28.8	15
1883	Feb	-34.2	16
1883	Mar	-30.8	13
1883	Apr	-15.9	17
1883	May	-6.8	24
1883	Jun	5.2	42
1883	Jul	8.8	57
1883	Aug	7.2	54
1883	Sep	0.8	24
1883	Oct	-14.1	24
1883	Nov	-26.8	14
1883	Dec	-29.5	38
1884	Jan	-24.5	16
1884	Feb	-31.6	7
1884	Mar	-29.8	28
1884	Apr	-24.4	3
1884	May	-9	11
1884	Jun	8.7	19
1884	Jul	11.3	32
1884	Aug	9.6	33
1884	Sep	2.2	25
1884	Oct	-10.4	22
1884	Nov	-22.5	17
1884	Dec	-29.8	32
1885	Jan	-25.5	11
1885	Feb	-37.2	4
1885	Mar	-27.7	13
1885	Apr	-17.8	11
1885	May	-5.5	13
1885	Jun	7.9	16
1885	Jul	11	26
1885	Aug	8.5	13
1885	Sep	2.6	36
1885	Oct	-12.1	16
1885	Nov	-18.9	19
1885	Dec	-25.2	43
1886	Jan	-35.5	11
1886	Feb	-33.9	18
1886	Mar	-22.5	13
1886	Apr	-19.9	5
1886	May	-3.5	19
1886	Jun	6.4	31
1886	Jul	12.2	26
1886	Aug	5.9	41
1886	Sep	1.6	27
1886	Oct	-12.1	22
1886	Nov	-27.1	9
1886	Dec	-33.1	35
1887	Jan	-30	5
1887	Feb	-26.1	11
1887	Mar	-27.3	4
1887	Apr	-18.6	7
1887	May	-8.7	10
1887	Jun	6.6	27
1887	Jul	10.4	46
1887	Aug	10.8	30
1887	Sep	2.7	27
1887	Oct	-8.1	36
1887	Nov	-20.3	21
1887	Dec	-29.1	17
1888	Jan	-31.9	8
1888	Feb	-25.3	25
1888	Mar	-30.2	9
1888	Apr	-22	4
1888	May	-4.3	19
1888	Jun	8.5	26
1888	Jul	11.6	37
1888	Aug	10.4	15
1888	Sep	2.5	37
1888	Oct	-11.1	24
1888	Nov	-18.5	14
1888	Dec	-25.1	13
1889	Jan	-27.3	24
1889	Feb	-24.9	28
1889	Mar	-29.5	19
1889	Apr	-18.2	6
1889	May	-3.2	25
1889	Jun	7.7	19
1889	Jul	9.7	40
1889	Aug	6.5	34
1889	Sep	-1.6	31
1889	Oct	-16.8	20
1889	Nov	-18.9	34
1889	Dec	-25.3	11
1890	Jan	-33.5	5
1890	Feb	-29.9	11
1890	Mar	-26.7	14
1890	Apr	-19.2	8
1890	May	-2.1	11
1890	Jun	6.9	21
1890	Jul	8.2	76
1890	Aug	5.7	34
1890	Sep	4.3	58
1890	Oct	-14.9	16
1890	Nov	-23.2	15
1890	Dec	-23.3	27
1891	Jan	-22.6	21
1891	Feb	-32.8	9
1891	Mar	-25.5	8
1891	Apr	-23.4	6
1891	May	-3.9	10
1891	Jun	8.1	21
1891	Jul	14.6	19
1891	Aug	10.4	39
1891	Sep	-1.4	28
1891	Oct	-16	13
1891	Nov	-29.8	9
1891	Dec	-25.9	38
1892	Jan	-32	22
1892	Feb	-27.6	24
1892	Mar	-30.6	20
1892	Apr	-17.2	7
1892	May	-4.6	33
1892	Jun	7.5	30
1892	Jul	15	19
1892	Aug	7.9	31
1892	Sep	2	36
1892	Oct	-12.2	23
1892	Nov	-19.2	31
1892	Dec	-29.5	28
1893	Jan	-28.6	19
1893	Feb	-36.3	15
1893	Mar	-32.7	15
1893	Apr	-16.8	10
1893	May	-5.6	14
1893	Jun	10.1	18
1893	Jul	12.4	43
1893	Aug	9.7	45
1893	Sep	2.7	31
1893	Oct	-11	31
1893	Nov	-18.1	18
1893	Dec	-29.2	29
1894	Jan	-28.2	12
1894	Feb	-26.7	17
1894	Mar	-29.4	17
1894	Apr	-20.3	8
1894	May	-4.1	16
1894	Jun	8.3	30
1894	Jul	9.4	33
1894	Aug	5.5	25
1894	Sep	0.1	19
1894	Oct	-11.2	35
1894	Nov	-19.6	19
1894	Dec	-34.9	13
1895	Jan	-27.1	20
1895	Feb	-24.8	17
1895	Mar	-27.1	17
1895	Apr	-20.5	9
1895	May	-4.9	11
1895	Jun	8.6	26
1895	Jul	11.8	40
1895	Aug	8.2	32
1895	Sep	-3.1	25
1895	Oct	-14.4	18
1895	Nov	-28.6	20
1895	Dec	-25.1	29
1896	Jan	-30.9	13
1896	Feb	-27.3	23
1896	Mar	-25.6	16
1896	Apr	-16.7	8
1896	May	-4.8	10
1896	Jun	7.5	30
1896	Jul	9.8	36
1896	Aug	7	29
1896	Sep	1.5	33
1896	Oct	-12.6	30
1896	Nov	-19.6	17
1896	Dec	-27.1	16
1897	Jan	-30.8	7
1897	Feb	-23.8	13
1897	Mar	-21.9	25
1897	Apr	-16.4	7
1897	May	-2.8	21
1897	Jun	9.3	35
1897	Jul	10.8	28
1897	Aug	4.5	32
1897	Sep	3	25
1897	Oct	-14.8	15
1897	Nov	-17.6	25
1897	Dec	-28.8	12
1898	Jan	-30.7	8
1898	Feb	-26.4	15
1898	Mar	-33.3	10
1898	Apr	-15.7	8
1898	May	-4.4	16
1898	Jun	8.4	48
1898	Jul	10.6	37
1898	Aug	10.6	30
1898	Sep	1.5	23
1898	Oct	-12.7	32
1898	Nov	-19.5	43
1898	Dec	-33.1	32
1899	Jan	-28.3	18
1899	Feb	-24.7	7
1899	Mar	-31.8	13
1899	Apr	-17	8
1899	May	-2.9	8
1899	Jun	6.9	36
1899	Jul	10.5	37
1899	Aug	7.4	26
1899	Sep	1.4	30
1899	Oct	-10.8	28
1899	Nov	-24.4	17
1899	Dec	-26.1	19
1900	Jan	-24.2	21
1900	Feb	-25.3	22
1900	Mar	-29.2	25
1900	Apr	-17.1	16
1900	May	-5.7	16
1900	Jun	5.9	37
1900	Jul	9.4	67
1900	Aug	9.5	48
1900	Sep	-0.6	33
1900	Oct	-10.4	45
1900	Nov	-27.4	14
1900	Dec	-28.9	28
1901	Jan	-25.9	14
1901	Feb	-34.3	8
1901	Mar	-30.4	9
1901	Apr	-16.8	6
1901	May	-2.6	19
1901	Jun	6.8	31
1901	Jul	11.6	21
1901	Aug	8.9	28
1901	Sep	3.7	42
1901	Oct	-7.1	89
1901	Nov	-22.7	25
1901	Dec	-31.4	11
1902	Jan	-29.1	16
1902	Feb	-37.1	3
1902	Mar	-32.8	4
1902	Apr	-15.5	14
1902	May	-3.3	13
1902	Jun	5.4	42
1902	Jul	11.5	29
1902	Aug	8.1	39
1902	Sep	1.4	24
1902	Oct	-12.5	50
1902	Nov	-29.4	7
1902	Dec	-32.1	23
1903	Jan	-33.6	11
1903	Feb	-37.3	7
1903	Mar	-25.7	15
1903	Apr	-16.8	6
1903	May	-1.9	11
1903	Jun	5.1	36
1903	Jul	7.6	39
1903	Aug	7.6	36
1903	Sep	-0.5	19
1903	Oct	-14.7	17
1903	Nov	-27.1	9
1903	Dec	-24	47
1904	Jan	-33.2	9
1904	Feb	-28.4	15
1904	Mar	-32.1	15
1904	Apr	-20.1	7
1904	May	-1.9	8
1904	Jun	7.2	27
1904	Jul	11.8	33
1904	Aug	8.7	29
1904	Sep	-4	22
1904	Oct	-14.8	22
1904	Nov	-22.2	38
1904	Dec	-32	45
1905	Jan	-31.8	17
1905	Feb	-33.3	13
1905	Mar	-32.9	12
1905	Apr	-21.9	4
1905	May	-7.3	11
1905	Jun	4.8	40
1905	Jul	9.1	67
1905	Aug	10.5	14
1905	Sep	-0.1	15
1905	Oct	-8.5	49
1905	Nov	-23.2	23
1905	Dec	-32.7	12
1906	Jan	-30.5	12
1906	Feb	-28.1	16
1906	Mar	-32.1	6
1906	Apr	-23.2	6
1906	May	-8	17
1906	Jun	7.6	24
1906	Jul	10.3	36
1906	Aug	10.7	27
1906	Sep	0.9	31
1906	Oct	-10.2	34
1906	Nov	-18.3	21
1906	Dec	-34.1	27
1907	Jan	-26.6	16
1907	Feb	-30.5	20
1907	Mar	-21.8	21
1907	Apr	-22	14
1907	May	-6.3	23
1907	Jun	9.2	14
1907	Jul	10.8	29
1907	Aug	6.7	33
1907	Sep	1.6	33
1907	Oct	-9	31
1907	Nov	-17.5	29
1907	Dec	-23.4	31
1908	Jan	-33.6	9
1908	Feb	-28.4	13
1908	Mar	-23.1	9
1908	Apr	-15.5	8
1908	May	-2.8	14
1908	Jun	9.4	25
1908	Jul	13.2	22
1908	Aug	7	32
1908	Sep	0.9	37
1908	Oct	-10.5	34
1908	Nov	-19	23
1908	Dec	-28.9	19
1909	Jan	-33.7	8
1909	Feb	-24.6	26
1909	Mar	-33.4	10
1909	Apr	-13.7	13
1909	May	-2.3	16
1909	Jun	8.4	27
1909	Jul	13.7	17
1909	Aug	8.1	39
1909	Sep	3.6	33
1909	Oct	-12.9	26
1909	Nov	-22.8	14
1909	Dec	-32.4	13
1910	Jan	-33.6	9
1910	Feb	-31.3	14
1910	Mar	-31.6	14
1910	Apr	-16.8	8
1910	May	-4.7	16
1910	Jun	6.2	24
1910	Jul	9.6	54
1910	Aug	7.9	49
1910	Sep	2	37
1910	Oct	-17.5	14
1910	Nov	-28.9	18
1910	Dec	-32.1	12
1911	Jan	-35.9	7
1911	Feb	-37	11
1911	Mar	-27.9	15
1911	Apr	-19.9	4
1911	May	-4.5	8
1911	Jun	7	21
1911	Jul	13.4	18
1911	Aug	8.9	34
1911	Sep	2	22
1911	Oct	-11.3	28
1911	Nov	-23.7	20
1911	Dec	-29.4	29
1912	Jan	-36.2	9
1912	Feb	-27.1	41
1912	Mar	-26.9	23
1912	Apr	-16.2	19
1912	May	-5.2	20
1912	Jun	5.8	36
1912	Jul	9.7	34
1912	Aug	7.6	23
1912	Sep	1.2	29
1912	Oct	-14	26
1912	Nov	-26.4	8
1912	Dec	-35.9	14
1913	Jan	-31.8	10
1913	Feb	-29.4	40
1913	Mar	-24.7	18
1913	Apr	-16.1	12
1913	May	-8.5	14
1913	Jun	8.1	17
1913	Jul	9.1	45
1913	Aug	8.2	42
1913	Sep	-0.1	27
1913	Oct	-8.7	40
1913	Nov	-26.7	28
1913	Dec	-35.4	9
1914	Jan	-30.9	9
1914	Feb	-25.6	23
1914	Mar	-28.2	28
1914	Apr	-18	16
1914	May	-7.5	11
1914	Jun	4	32
1914	Jul	11.8	21
1914	Aug	9.7	24
1914	Sep	1.3	33
1914	Oct	-16.8	19
1914	Nov	-25.1	17
1914	Dec	-31.2	23
1915	Jan	-28.3	8
1915	Feb	-33.6	20
1915	Mar	-30.8	14
1915	Apr	-16	11
1915	May	-4.1	16
1915	Jun	8.2	27
1915	Jul	9.4	50
1915	Aug	8.3	16
1915	Sep	0.4	26
1915	Oct	-10.5	31
1915	Nov	-22.3	15
1915	Dec	-28.4	15
1916	Jan	-32.5	16
1916	Feb	-29.4	7
1916	Mar	-28.7	8
1916	Apr	-16.7	12
1916	May	-8.4	13
1916	Jun	8.4	22
1916	Jul	13.7	21
1916	Aug	6.2	40
1916	Sep	1.2	48
1916	Oct	-15.5	32
1916	Nov	-28.6	14
1916	Dec	-29.5	45
1917	Jan	-27.7	4
1917	Feb	-22.8	31
1917	Mar	-33.6	6
1917	Apr	-19.5	10
1917	May	-3.6	9
1917	Jun	8.2	14
1917	Jul	13.9	29
1917	Aug	7.5	32
1917	Sep	2	10
1917	Oct	-11.6	50
1917	Nov	-20.4	31
1917	Dec	-30.7	8
1918	Jan	-28.7	18
1918	Feb	-35.4	15
1918	Mar	-32.1	4
1918	Apr	-22.7	2
1918	May	-5	10
1918	Jun	9.7	16
1918	Jul	12	29
1918	Aug	7.4	14
1918	Sep	3	28
1918	Oct	-11.1	20
1918	Nov	-19	25
1918	Dec	-23	35
1919	Jan	-31.1	7
1919	Feb	-23.1	20
1919	Mar	-35.1	7
1919	Apr	-19.6	15
1919	May	-1.1	8
1919	Jun	10.1	15
1919	Jul	11.9	36
1919	Aug	10.3	54
1919	Sep	-1.1	26
1919	Oct	-11.7	30
1919	Nov	-22.4	16
1919	Dec	-29.2	26
1920	Jan	-36.5	4
1920	Feb	-35	8
1920	Mar	-31.4	12
1920	Apr	-16.2	11
1920	May	-3.5	13
1920	Jun	6.5	25
1920	Jul	13.5	41
1920	Aug	7.2	14
1920	Sep	-3.3	22
1920	Oct	-16.1	28
1920	Nov	-26.7	18
1920	Dec	-36	21
1921	Jan	-26.7	17
1921	Feb	-28.2	14
1921	Mar	-27.9	16
1921	Apr	-17.8	19
1921	May	-5.6	21
1921	Jun	6.9	19
1921	Jul	13.2	20
1921	Aug	8.3	56
1921	Sep	-1.5	27
1921	Oct	-11.4	25
1921	Nov	-29.3	10
1921	Dec	-32.8	18
1922	Jan	-31.8	15
1922	Feb	-34.1	19
1922	Mar	-26.5	10
1922	Apr	-11.6	13
1922	May	-1.4	15
1922	Jun	11	28
1922	Jul	14.4	17
1922	Aug	12.5	4
1922	Sep	3.3	38
1922	Oct	-10.1	34
1922	Nov	-27.8	18
1922	Dec	-31.9	10
1923	Jan	-30.7	22
1923	Feb	-30.3	19
1923	Mar	-27.3	27
1923	Apr	-18	5
1923	May	-5.2	14
1923	Jun	9.3	30
1923	Jul	9.8	44
1923	Aug	9.6	32
1923	Sep	-2.7	33
1923	Oct	-12.3	38
1923	Nov	-18.8	40
1923	Dec	-34	24
1924	Jan	-30.1	19
1924	Feb	-27.5	23
1924	Mar	-28.8	9
1924	Apr	-20.5	13
1924	May	-8.7	4
1924	Jun	4.5	30
1924	Jul	9.7	50
1924	Aug	8.2	23
1924	Sep	-1.5	38
1924	Oct	-13.5	15
1924	Nov	-28.6	8
1924	Dec	-28.8	44
1925	Jan	-31.4	24
1925	Feb	-27.2	23
1925	Mar	-27.6	17
1925	Apr	-16.8	8
1925	May	-7.4	12
1925	Jun	6.1	22
1925	Jul	13.5	25
1925	Aug	10.2	30
1925	Sep	0.5	36
1925	Oct	-16.1	52
1925	Nov	-24.9	16
1925	Dec	-32.9	21
1926	Jan	-32.5	8
1926	Feb	-31.4	7
1926	Mar	-34.4	4
1926	Apr	-17.7	9
1926	May	-6.3	19
1926	Jun	8.2	15
1926	Jul	10.2	24
1926	Aug	7.9	20
1926	Sep	-1.1	19
1926	Oct	-10.1	44
1926	Nov	-25.2	25
1926	Dec	-24.9	10
1927	Jan	-27.6	8
1927	Feb	-34.4	6
1927	Mar	-33.5	13
1927	Apr	-19	11
1927	May	-5.9	18
1927	Jun	5.9	32
1927	Jul	8.2	45
1927	Aug	8.7	9
1927	Sep	2	42
1927	Oct	-13.9	25
1927	Nov	-20.2	18
1927	Dec	-26.6	27
1928	Jan	-30	13
1928	Feb	-32.2	25
1928	Mar	-30.8	8
1928	Apr	-19	6
1928	May	-4.5	11
1928	Jun	6.2	39
1928	Jul	9.3	46
1928	Aug	7	60
1928	Sep	0.3	25
1928	Oct	-11.8	35
1928	Nov	-27.3	12
1928	Dec	-31.2	10
1929	Jan	-28.3	10
1929	Feb	-29.7	7
1929	Mar	-22.4	9
1929	Apr	-16.8	4
1929	May	-3.1	8
1929	Jun	9.4	37
1929	Jul	11.5	21
1929	Aug	5.8	53
1929	Sep	-2.2	24
1929	Oct	-12.1	21
1929	Nov	-19.6	24
1929	Dec	-23.1	13
1930	Jan	-30.6	7
1930	Feb	-30.5	13
1930	Mar	-28	13
1930	Apr	-20.2	8
1930	May	-6.3	14
1930	Jun	8.1	21
1930	Jul	13.2	24
1930	Aug	10.9	23
1930	Sep	2.9	27
1930	Oct	-14.4	44
1930	Nov	-26.1	20
1930	Dec	-29.6	18
1931	Jan	-35.1	17
1931	Feb	-39.7	4
1931	Mar	-28.7	14
1931	Apr	-18.8	22
1931	May	-3.7	17
1931	Jun	4.5	41
1931	Jul	10	35
1931	Aug	9.3	34
1931	Sep	-1.4	26
1931	Oct	-17.7	16
1931	Nov	-24.5	20
1931	Dec	-34.4	22
1932	Jan	-33.8	7
1932	Feb	-35.8	11
1932	Mar	-25	6
1932	Apr	-18.2	8
1932	May	-4.8	14
1932	Jun	7.7	30
1932	Jul	11.7	16
1932	Aug	12.8	35
1932	Sep	0.1	22
1932	Oct	-18	11
1932	Nov	-24.2	24
1932	Dec	-33.2	9
1933	Jan	-26	27
1933	Feb	-32.9	11
1933	Mar	-34.4	6
1933	Apr	-20.8	11
1933	May	-5.1	7
1933	Jun	8.5	21
1933	Jul	9.2	44
1933	Aug	6.3	20
1933	Sep	-0.9	21
1933	Oct	-14	12
1933	Nov	-26.3	15
1933	Dec	-31.6	14
1934	Jan	-32.8	16
1934	Feb	-28.9	13
1934	Mar	-21.7	33
1934	Apr	-14.7	19
1934	May	-2.4	10
1934	Jun	6.4	36
1934	Jul	13.6	28
1934	Aug	10.8	20
1934	Sep	-0.4	23
1934	Oct	-9	22
1934	Nov	-23.4	14
1934	Dec	-32.6	15
1935	Jan	-33.3	4
1935	Feb	-25.3	8
1935	Mar	-32.3	9
1935	Apr	-17.6	6
1935	May	-1.9	14
1935	Jun	8.9	14
1935	Jul	12.9	22
1935	Aug	8.3	42
1935	Sep	0.9	37
1935	Oct	-12.5	29
1935	Nov	-25.9	19
1935	Dec	-25.7	35
1936	Jan	-26.3	24
1936	Feb	-29.1	11
1936	Mar	-30.4	19
1936	Apr	-21.7	13
1936	May	-3.6	13
1936	Jun	6.7	31
1936	Jul	11	26
1936	Aug	8.8	51
1936	Sep	0.9	31
1936	Oct	-15.1	12
1936	Nov	-19.9	24
1936	Dec	-30.6	9
1937	Jan	-21.3	24
1937	Feb	-33.3	10
1937	Mar	-25.6	15
1937	Apr	-18.5	12
1937	May	-6.5	19
1937	Jun	11	30
1937	Jul	11.3	49
1937	Aug	6.5	52
1937	Sep	2.6	32
1937	Oct	-15.7	39
1937	Nov	-20.4	18
1937	Dec	-28.2	19
1938	Jan	-27.4	24
1938	Feb	-26.5	17
1938	Mar	-24.6	20
1938	Apr	-14.3	9
1938	May	-3.3	20
1938	Jun	9.8	30
1938	Jul	13.3	40
1938	Aug	8.5	43
1938	Sep	0.3	24
1938	Oct	-11.3	41
1938	Nov	-22.7	29
1938	Dec	-26.2	37
1939	Jan	-33	6
1939	Feb	-31.3	7
1939	Mar	-26.9	5
1939	Apr	-18.4	7
1939	May	-1.9	16
1939	Jun	8.6	14
1939	Jul	12.9	44
1939	Aug	8	33
1939	Sep	3.2	32
1939	Oct	-13.3	13
1939	Nov	-22.6	11
1939	Dec	-27.3	31
1940	Jan	-30.9	17
1940	Feb	-25.9	15
1940	Mar	-24.7	18
1940	Apr	-16.9	14
1940	May	-2.9	11
1940	Jun	10.6	8
1940	Jul	13.9	23
1940	Aug	7.5	25
1940	Sep	0.5	23
1940	Oct	-15.8	35
1940	Nov	-15.3	19
1940	Dec	-25.6	10
1941	Jan	-23.2	13
1941	Feb	-23	10
1941	Mar	-22.7	26
1941	Apr	-24.1	9
1941	May	-5.8	16
1941	Jun	5.8	39
1941	Jul	11	27
1941	Aug	10	28
1941	Sep	3.6	28
1941	Oct	-14.4	14
1941	Nov	-15.7	43
1941	Dec	-27.1	10
1942	Jan	-27	15
1942	Feb	-26	26
1942	Mar	-32.8	10
1942	Apr	-22.7	9
1942	May	-4.2	11
1942	Jun	6.9	38
1942	Jul	12.1	31
1942	Aug	7	41
1942	Sep	2.2	21
1942	Oct	-11.8	35
1942	Nov	-16.3	40
1942	Dec	-24.8	35
1943	Jan	-26.2	14
1943	Feb	-29	4
1943	Mar	-21.3	19
1943	Apr	-11.6	17
1943	May	-2.2	7
1943	Jun	8.5	24
1943	Jul	16.8	31
1943	Aug	10.8	21
1943	Sep	4.9	32
1943	Oct	-9.7	28
1943	Nov	-24.4	15
1943	Dec	-26.4	37
1944	Jan	-26.5	8
1944	Feb	-33.1	16
1944	Mar	-27.3	8
1944	Apr	-14.2	9
1944	May	-5.5	25
1944	Jun	10.2	23
1944	Jul	17.3	33
1944	Aug	9.2	26
1944	Sep	3.8	37
1944	Oct	-9.7	19
1944	Nov	-17	35
1944	Dec	-27.1	31
1945	Jan	-30.2	14
1945	Feb	-28.3	13
1945	Mar	-27.7	9
1945	Apr	-18.4	13
1945	May	-7.5	11
1945	Jun	7.2	48
1945	Jul	9.7	44
1945	Aug	7.7	27
1945	Sep	3.1	45
1945	Oct	-12.5	9
1945	Nov	-27.7	8
1945	Dec	-30.6	29
1946	Jan	-33.7	11
1946	Feb	-24.9	13
1946	Mar	-32.1	13
1946	Apr	-18.3	6
1946	May	-1.4	6
1946	Jun	9.3	26
1946	Jul	12.7	38
1946	Aug	10.1	17
1946	Sep	-1.3	15
1946	Oct	-6.2	30
1946	Nov	-25.1	28
1946	Dec	-33.3	31
1947	Jan	-36.9	4
1947	Feb	-24.3	25
1947	Mar	-31.5	13
1947	Apr	-17.2	11
1947	May	-6.8	10
1947	Jun	8	30
1947	Jul	8.2	59
1947	Aug	7.4	23
1947	Sep	1.9	22
1947	Oct	-8.5	33
1947	Nov	-20.9	24
1947	Dec	-30.2	19
1948	Jan	-34.5	12
1948	Feb	-34.2	13
1948	Mar	-24.5	16
1948	Apr	-22.7	6
1948	May	-6.6	14
1948	Jun	5.6	33
1948	Jul	7.6	35
1948	Aug	7.3	19
1948	Sep	4.3	17
1948	Oct	-8.9	28
1948	Nov	-26	14
1948	Dec	-36.1	18
1949	Jan	-33.2	6
1949	Feb	-36.3	9
1949	Mar	-34.3	9
1949	Apr	-25.1	6
1949	May	-4.3	6
1949	Jun	5.1	47
1949	Jul	9.7	54
1949	Aug	7.6	51
1949	Sep	1.2	29
1949	Oct	-14.4	12
1949	Nov	-17	46
1949	Dec	-22.5	30
1950	Jan	-35	5
1950	Feb	-34.7	7
1950	Mar	-25.1	12
1950	Apr	-16.8	20
1950	May	-7.5	13
1950	Jun	11.5	25
1950	Jul	10.3	24
1950	Aug	10.7	33
1950	Sep	0.6	34
1950	Oct	-5.7	31
1950	Nov	-22.7	17
1950	Dec	-32.2	26
1951	Jan	-22.8	34
1951	Feb	-24.9	7
1951	Mar	-30.6	19
1951	Apr	-23.5	10
1951	May	-5.3	7
1951	Jun	6.7	26
1951	Jul	11.4	48
1951	Aug	7	35
1951	Sep	1.7	43
1951	Oct	-16.4	22
1951	Nov	-17.4	21
1951	Dec	-27.9	24
1952	Jan	-33.3	14
1952	Feb	-36.6	8
1952	Mar	-32.4	7
1952	Apr	-24.1	5
1952	May	-7.2	12
1952	Jun	7.6	28
1952	Jul	8.7	45
1952	Aug	6.8	39
1952	Sep	-0.4	24
1952	Oct	-15.9	12
1952	Nov	-29.6	17
1952	Dec	-33.4	12
1953	Jan	-26.1	15
1953	Feb	-32.6	17
1953	Mar	-30.5	13
1953	Apr	-18.9	14
1953	May	-9.5	23
1953	Jun	8	12
1953	Jul	13.7	30
1953	Aug	9.8	49
1953	Sep	-2.7	18
1953	Oct	-8.5	32
1953	Nov	-22.9	28
1953	Dec	-28.6	53
1954	Jan	-35.8	9
1954	Feb	-25.8	33
1954	Mar	-26.9	14
1954	Apr	-14.7	12
1954	May	-6.4	15
1954	Jun	5.9	37
1954	Jul	10	47
1954	Aug	6.6	39
1954	Sep	-3	30
1954	Oct	-11.5	46
1954	Nov	-26.9	6
1954	Dec	-29.6	25
1955	Jan	-34.4	7
1955	Feb	-26	13
1955	Mar	-27.5	16
1955	Apr	-19.1	5
1955	May	-6.8	20
1955	Jun	5.7	30
1955	Jul	9.5	36
1955	Aug	6.4	32
1955	Sep	1.4	21
1955	Oct	-12.2	19
1955	Nov	-24.4	14
1955	Dec	-22	14
1956	Jan	-30.9	16
1956	Feb	-30.4	4
1956	Mar	-22	41
1956	Apr	-18	14
1956	May	-2.5	14
1956	Jun	6.4	22
1956	Jul	11.8	55
1956	Aug	9.3	46
1956	Sep	0.3	20
1956	Oct	-14.9	14
1956	Nov	-16.9	39
1956	Dec	-30.2	15
1957	Jan	-29.7	12
1957	Feb	-34	17
1957	Mar	-34.6	9
1957	Apr	-22.1	8
1957	May	-5.9	9
1957	Jun	8.4	7
1957	Jul	12.9	28
1957	Aug	10.1	30
1957	Sep	2.6	25
1957	Oct	-7.2	24
1957	Nov	-16.9	36
1957	Dec	-27	37
1958	Jan	-28.4	20
1958	Feb	-23	13
1958	Mar	-22.9	33
1958	Apr	-15.1	8
1958	May	-4.2	23
1958	Jun	10.2	29
1958	Jul	11.9	48
1958	Aug	8.9	33
1958	Sep	1.2	38
1958	Oct	-11.7	28
1958	Nov	-18.8	24
1958	Dec	-27.5	29
1959	Jan	-23.9	17
1959	Feb	-31.7	17
1959	Mar	-28.7	16
1959	Apr	-18.6	11
1959	May	-4.5	12
1959	Jun	9.9	24
1959	Jul	11.6	25
1959	Aug	8.4	46
1959	Sep	-1.1	34
1959	Oct	-13.4	39
1959	Nov	-20.1	27
1959	Dec	-28.3	36
1960	Jan	-28.7	15
1960	Feb	-34.9	5
1960	Mar	-27.2	27
1960	Apr	-16.7	8
1960	May	-0.2	16
1960	Jun	10	14
1960	Jul	15.1	30
1960	Aug	10.3	15
1960	Sep	-2	18
1960	Oct	-14.7	17
1960	Nov	-21.7	14
1960	Dec	-29.4	18
1961	Jan	-30.9	11
1961	Feb	-27.4	18
1961	Mar	-22.7	37
1961	Apr	-15.8	12
1961	May	0.2	8
1961	Jun	12.2	28
1961	Jul	10.8	53
1961	Aug	6.5	23
1961	Sep	3.1	34
1961	Oct	-11.2	17
1961	Nov	-19.7	17
1961	Dec	-28.9	19
1962	Jan	-35.2	7
1962	Feb	-26.9	17
1962	Mar	-30.1	20
1962	Apr	-21	10
1962	May	-6.2	16
1962	Jun	6.4	32
1962	Jul	14.5	33
1962	Aug	7.8	40
1962	Sep	3.4	29
1962	Oct	-15.2	15
1962	Nov	-23.8	23
1962	Dec	-33.4	7
1963	Jan	-29	13
1963	Feb	-32.3	10
1963	Mar	-35.1	1
1963	Apr	-20.2	9
1963	May	-2.7	20
1963	Jun	5.2	33
1963	Jul	8.1	46
1963	Aug	6.5	48
1963	Sep	-2.2	19
1963	Oct	-15.6	19
1963	Nov	-19.6	23
1963	Dec	-33.7	16
1964	Jan	-34.6	7
1964	Feb	-36	7
1964	Mar	-30.8	16
1964	Apr	-16	12
1964	May	-5.6	17
1964	Jun	10.4	5
1964	Jul	17	8
1964	Aug	10.6	27
1964	Sep	1.6	39
1964	Oct	-13.6	22
1964	Nov	-23.1	32
1964	Dec	-29.1	34
1965	Jan	-30.1	16
1965	Feb	-21.8	7
1965	Mar	-25.8	21
1965	Apr	-21.4	6
1965	May	-5.3	25
1965	Jun	8.4	18
1965	Jul	11.6	33
1965	Aug	9.2	20
1965	Sep	-1.2	17
1965	Oct	-15.4	11
1965	Nov	-25.9	25
1965	Dec	-35.3	25
1966	Jan	-26.9	25
1966	Feb	-29.5	10
1966	Mar	-21.6	15
1966	Apr	-13.1	13
1966	May	-4.2	12
1966	Jun	10.2	22
1966	Jul	9.9	39
1966	Aug	7.8	48
1966	Sep	-2.9	24
1966	Oct	-14.5	23
1966	Nov	-26.3	12
1966	Dec	-28.6	12
1967	Jan	-21.8	30
1967	Feb	-30.3	5
1967	Mar	-28.6	12
1967	Apr	-19.9	15
1967	May	-9	10
1967	Jun	6.6	32
1967	Jul	10.9	31
1967	Aug	11.4	6
1967	Sep	1.6	29
1967	Oct	-13.4	25
1967	Nov	-19.7	8
1967	Dec	-30.8	15
1968	Jan	-33.8	10
1968	Feb	-36.8	12
1968	Mar	-36.4	3
1968	Apr	-16.5	11
1968	May	-4.7	16
1968	Jun	7.2	53
1968	Jul	9.2	47
1968	Aug	8	39
1968	Sep	-0.7	44
1968	Oct	-13.7	41
1968	Nov	-25.9	13
1968	Dec	-22.9	17
1969	Jan	-33.7	17
1969	Feb	-23.1	28
1969	Mar	-31.3	5
1969	Apr	-14.4	16
1969	May	-3.3	19
1969	Jun	10.5	18
1969	Jul	11.1	39
1969	Aug	11.3	47
1969	Sep	6.3	39
1969	Oct	-7.7	36
1969	Nov	-23.9	17
1969	Dec	-29.8	13
1970	Jan	-24.3	24
1970	Feb	-23.8	23
1970	Mar	-21.9	13
1970	Apr	-20.1	7
1970	May	-3	14
1970	Jun	11.4	15
1970	Jul	16.8	14
1970	Aug	8.7	26
1970	Sep	2.6	23
1970	Oct	-12.4	34
1970	Nov	-26.6	17
1970	Dec	-23.7	24
1971	Jan	-23.9	27
1971	Feb	-35.1	10
1971	Mar	-29.8	6
1971	Apr	-16.2	8
1971	May	-0.7	14
1971	Jun	11	25
1971	Jul	11.4	16
1971	Aug	11.7	16
1971	Sep	3.7	23
1971	Oct	-9.3	28
1971	Nov	-24.4	15
1971	Dec	-34.1	9
1972	Jan	-24.3	18
1972	Feb	-32.5	16
1972	Mar	-33.5	7
1972	Apr	-17.3	13
1972	May	-6.7	12
1972	Jun	5.6	37
1972	Jul	10.2	69
1972	Aug	6.1	32
1972	Sep	-3.1	31
1972	Oct	-12.7	26
1972	Nov	-28	8
1972	Dec	-34.2	15
1973	Jan	-32.9	8
1973	Feb	-27.2	23
1973	Mar	-22.4	15
1973	Apr	-16.5	14
1973	May	-3.7	8
1973	Jun	8.5	31
1973	Jul	12.3	20
1973	Aug	7.2	41
1973	Sep	-1.1	23
1973	Oct	-16.7	14
1973	Nov	-22.1	28
1973	Dec	-23.5	19
1974	Jan	-31.9	15
1974	Feb	-34.8	16
1974	Mar	-22.4	11
1974	Apr	-13	21
1974	May	-3.1	12
1974	Jun	15.5	7
1974	Jul	14.8	61
1974	Aug	10.6	28
1974	Sep	2.1	23
1974	Oct	-8.4	12
1974	Nov	-19.3	33
1974	Dec	-25.9	21
1975	Jan	-22.1	35
1975	Feb	-26.7	3
1975	Mar	-25.5	7
1975	Apr	-17.6	10
1975	May	-3	21
1975	Jun	12.6	16
1975	Jul	15.2	30
1975	Aug	6.4	45
1975	Sep	4.5	27
1975	Oct	-9.5	35
1975	Nov	-23.9	18
1975	Dec	-24.2	21
1976	Jan	-30.2	17
1976	Feb	-32.6	10
1976	Mar	-30.4	12
1976	Apr	-23.6	7
1976	May	-5.2	13
1976	Jun	4.5	30
1976	Jul	12.5	28
1976	Aug	11.5	28
1976	Sep	1	26
1976	Oct	-8.4	45
1976	Nov	-21.8	31
1976	Dec	-34.6	14
1977	Jan	-27	15
1977	Feb	-30.4	14
1977	Mar	-26.7	7
1977	Apr	-17.2	8
1977	May	-3.3	17
1977	Jun	8.2	31
1977	Jul	11	39
1977	Aug	7.9	27
1977	Sep	4.3	34
1977	Oct	-10.8	39
1977	Nov	-24.9	21
1977	Dec	-25.1	25
1978	Jan	-32.6	6
1978	Feb	-24.5	15
1978	Mar	-25	6
1978	Apr	-16	12
1978	May	-5.7	16
1978	Jun	5	34
1978	Jul	11.5	31
1978	Aug	7.9	53
1978	Sep	-0.9	28
1978	Oct	-13.1	43
1978	Nov	-24.2	23
1978	Dec	-24.3	11
1979	Jan	-29	8
1979	Feb	-29.9	13
1979	Mar	-26.4	11
1979	Apr	-19.7	10
1979	May	-8.7	27
1979	Jun	6	33
1979	Jul	10.4	57
1979	Aug	6.7	18
1979	Sep	-1.7	26
1979	Oct	-15.5	25
1979	Nov	-17.4	28
1979	Dec	-21.1	44
1980	Jan	-29.4	16
1980	Feb	-25.3	30
1980	Mar	-22.9	7
1980	Apr	-21	4
1980	May	-4.8	17
1980	Jun	6.5	31
1980	Jul	11.6	33
1980	Aug	6.6	56
1980	Sep	-0.6	28
1980	Oct	-16.3	11
1980	Nov	-28.2	19
1980	Dec	-27.1	22
1981	Jan	-34	21
1981	Feb	-33.3	1
1981	Mar	-28.3	10
1981	Apr	-19.2	14
1981	May	-7.8	17
1981	Jun	8.9	16
1981	Jul	15.2	23
1981	Aug	10.6	31
1981	Sep	0.6	29
1981	Oct	-12.7	28
1981	Nov	-25.8	12
1981	Dec	-30.4	22
1982	Jan	-28.8	14
1982	Feb	-37.8	5
1982	Mar	-32.9	11
1982	Apr	-16.4	15
1982	May	-2.6	16
1982	Jun	7.2	35
1982	Jul	9.9	40
1982	Aug	7.9	32
1982	Sep	0.3	21
1982	Oct	-12.5	28
1982	Nov	-17.6	29
1982	Dec	-24.7	23
1983	Jan	-26	5
1983	Feb	-29.6	10
1983	Mar	-22.8	28
1983	Apr	-17.5	10
1983	May	-4.5	15
1983	Jun	5.3	50
1983	Jul	10.2	38
1983	Aug	6.6	60
1983	Sep	-1.4	21
1983	Oct	-12	31
1983	Nov	-24.6	15
1983	Dec	-21.9	36
1984	Jan	-25.6	11
1984	Feb	-24.9	13
1984	Mar	-20.3	12
1984	Apr	-13.3	19
1984	May	-0.4	18
1984	Jun	7.8	28
1984	Jul	14.3	19
1984	Aug	10.5	29
1984	Sep	0.2	31
1984	Oct	-10.7	31
1984	Nov	-22.6	18
1984	Dec	-33.5	17
1985	Jan	-33.5	8
1985	Feb	-23.8	34
1985	Mar	-28.3	12
1985	Apr	-19.9	9
1985	May	-6.6	15
1985	Jun	6.3	23
1985	Jul	9.6	60
1985	Aug	8.6	45
1985	Sep	-0.7	34
1985	Oct	-8.1	53
1985	Nov	-26.2	10
1985	Dec	-29	37
1986	Jan	-31.1	23
1986	Feb	-27.3	17
1986	Mar	-26.8	20
1986	Apr	-17	9
1986	May	-4	16
1986	Jun	5.7	27
1986	Jul	9.3	41
1986	Aug	5.7	38
1986	Sep	2.5	22
1986	Oct	-15.2	19
1986	Nov	-27	10
1986	Dec	-23.9	30
1987	Jan	-24.7	23
1987	Feb	-32.4	18
1987	Mar	-25.5	24
1987	Apr	-18.6	13
1987	May	-5.6	9
1987	Jun	7.2	43
1987	Jul	9.7	34
1987	Aug	8.9	38
1987	Sep	0.4	28
1987	Oct	-11.3	25
1987	Nov	-24.4	26
1987	Dec	-27	34
1988	Jan	-30.1	12
1988	Feb	-26.1	14
1988	Mar	-23.8	19
1988	Apr	-17.1	6
1988	May	-6.3	6
1988	Jun	10.4	20
1988	Jul	14.7	23
1988	Aug	5.6	42
1988	Sep	0.3	12
1988	Oct	-15.2	16
1988	Nov	-15.6	45
1988	Dec	-21.1	37
1989	Jan	-23.1	20
1989	Feb	-28.1	20
1989	Mar	-26.1	17
1989	Apr	-18.1	12
1989	May	-3.6	19
1989	Jun	6.4	21
1989	Jul	10	36
1989	Aug	10.1	27
1989	Sep	3.6	31
1989	Oct	-14.3	15
1989	Nov	-25.4	17
1989	Dec	-30	16
1990	Jan	-25	13
1990	Feb	-22.6	8
1990	Mar	-28	6
1990	Apr	-15.5	10
1990	May	-3.5	21
1990	Jun	5.9	49
1990	Jul	9.2	50
1990	Aug	10.2	33
1990	Sep	2.2	43
1990	Oct	-13.1	31
1990	Nov	-20.6	32
1990	Dec	-23.4	23
1991	Jan	-31.6	13
1991	Feb	-33.1	5
1991	Mar	-27.3	24
1991	Apr	-18	11
1991	May	-6.5	6
1991	Jun	7.7	22
1991	Jul	13.1	64
1991	Aug	10.2	14
1991	Sep	3.6	31
1991	Oct	-15.5	31
1991	Nov	-17	41
1991	Dec	-24.5	19
1992	Jan	-24.9	20
1992	Feb	-26.2	30
1992	Mar	-29.9	7
1992	Apr	-13.9	21
1992	May	-3.1	16
1992	Jun	8.6	18
1992	Jul	14.3	21
1992	Aug	11	17
1992	Sep	0.1	38
1992	Oct	-9	34
1992	Nov	-18.7	47
1992	Dec	-26.6	33
1993	Jan	-22.5	21
1993	Feb	-33.3	10
1993	Mar	-29.6	12
1993	Apr	-16.9	6
1993	May	-2.3	9
1993	Jun	10.7	13
1993	Jul	10.2	36
1993	Aug	6.2	40
1993	Sep	-0.2	31
1993	Oct	-17.8	14
1993	Nov	-20.7	27
1993	Dec	-26.7	30
1994	Jan	-29.2	13
1994	Feb	-29.2	25
1994	Mar	-24.4	17
1994	Apr	-21.8	11
1994	May	-1.8	15
1994	Jun	12.9	10
1994	Jul	13.9	30
1994	Aug	7.8	65
1994	Sep	-0.1	14
1994	Oct	-11.5	31
1994	Nov	-20.2	21
1994	Dec	-32.5	18
1995	Jan	-32.6	11
1995	Feb	-26.2	17
1995	Mar	-33	8
1995	Apr	-15.1	10
1995	May	-7	12
1995	Jun	9.2	12
1995	Jul	12	28
1995	Aug	7.8	33
1995	Sep	-1.1	20
1995	Oct	-16.5	12
1995	Nov	-28	7
1995	Dec	-35.3	14
1996	Jan	-30.9	15
1996	Feb	-35.7	12
1996	Mar	-23.1	25
1996	Apr	-20.8	3
1996	May	-0.1	15
1996	Jun	12	32
1996	Jul	10.7	42
1996	Aug	6.5	23
1996	Sep	0.7	18
1996	Oct	-11.8	21
1996	Nov	-19.7	24
1996	Dec	-24.7	15
1997	Jan	-21.8	18
1997	Feb	-31.3	8
1997	Mar	-22	22
1997	Apr	-15.6	6
1997	May	-1.3	17
1997	Jun	9.6	29
1997	Jul	10.7	44
1997	Aug	7.1	35
1997	Sep	1.8	30
1997	Oct	-13	13
1997	Nov	-22	14
1997	Dec	-32.6	18
1998	Jan	-35.3	6
1998	Feb	-23.9	37
1998	Mar	-27.7	19
1998	Apr	-16.1	4
1998	May	-0.5	11
1998	Jun	11.6	20
1998	Jul	17	8
1998	Aug	9.8	46
1998	Sep	0	18
1998	Oct	-9.4	30
1998	Nov	-22.9	14
1998	Dec	-34.2	4
1999	Jan	-26.8	20
1999	Feb	-29	9
1999	Mar	-29.4	16
1999	Apr	-22.2	3
1999	May	-8.2	6
1999	Jun	4.5	46
1999	Jul	9.2	53
1999	Aug	8.7	48
1999	Sep	4.2	49
1999	Oct	-13.1	18
1999	Nov	-28.8	17
1999	Dec	-25.8	19
2000	Jan	-31.8	11
2000	Feb	-27.1	30
2000	Mar	-28.6	11
2000	Apr	-20.9	12
2000	May	-7.7	15
2000	Jun	6.8	24
2000	Jul	9.7	36
2000	Aug	6.3	36
2000	Sep	0.6	23
2000	Oct	-7.9	24
2000	Nov	-14.7	33
2000	Dec	-27.8	22

## Sheet: NS_Location2_ukmo-hadcm3_1860-2
Year	Month	Temperature_C	Precipitation_mm
1860	Jan	-28.1	13
1860	Feb	-31.8	11
1860	Mar	-32.8	15
1860	Apr	-14.3	10
1860	May	-5.4	12
1860	Jun	9.9	26
1860	Jul	12.7	36
1860	Aug	7.2	22
1860	Sep	3.8	34
1860	Oct	-9	27
1860	Nov	-28.6	13
1860	Dec	-25.8	16
1861	Jan	-33.7	19
1861	Feb	-33.2	6
1861	Mar	-30.2	15
1861	Apr	-15.1	12
1861	May	-4.1	12
1861	Jun	7.1	11
1861	Jul	11.9	32
1861	Aug	9.4	37
1861	Sep	0.6	25
1861	Oct	-14.8	21
1861	Nov	-18.9	46
1861	Dec	-28.2	20
1862	Jan	-31.3	18
1862	Feb	-33.4	16
1862	Mar	-28.3	8
1862	Apr	-16.4	9
1862	May	-4.3	13
1862	Jun	7.7	35
1862	Jul	11.9	52
1862	Aug	7.1	32
1862	Sep	-5.6	26
1862	Oct	-18	20
1862	Nov	-28.3	23
1862	Dec	-33.7	10
1863	Jan	-35.8	33
1863	Feb	-27.1	15
1863	Mar	-35.4	7
1863	Apr	-18.5	6
1863	May	-4.9	14
1863	Jun	9.7	26
1863	Jul	13.2	29
1863	Aug	10.1	43
1863	Sep	0.4	25
1863	Oct	-12.8	22
1863	Nov	-21.2	23
1863	Dec	-33.6	22
1864	Jan	-37	5
1864	Feb	-28.3	9
1864	Mar	-25.4	12
1864	Apr	-16.7	17
1864	May	-3.6	15
1864	Jun	8.4	30
1864	Jul	14	17
1864	Aug	8.7	26
1864	Sep	1.7	23
1864	Oct	-8.9	20
1864	Nov	-26.1	16
1864	Dec	-28.6	36
1865	Jan	-29.2	13
1865	Feb	-28.5	5
1865	Mar	-26	14
1865	Apr	-16.2	11
1865	May	-6.4	14
1865	Jun	7.6	27
1865	Jul	8.6	71
1865	Aug	6	34
1865	Sep	2.5	23
1865	Oct	-12.9	29
1865	Nov	-28.8	25
1865	Dec	-25.4	35
1866	Jan	-28	15
1866	Feb	-32.3	11
1866	Mar	-24.4	28
1866	Apr	-14.5	13
1866	May	-2.1	11
1866	Jun	9.3	24
1866	Jul	12.9	37
1866	Aug	8.4	41
1866	Sep	3.1	26
1866	Oct	-13.8	23
1866	Nov	-17.6	19
1866	Dec	-33	9
1867	Jan	-32.4	22
1867	Feb	-25.2	18
1867	Mar	-29.9	8
1867	Apr	-21.4	6
1867	May	-7.5	6
1867	Jun	1.5	14
1867	Jul	16.7	21
1867	Aug	8	15
1867	Sep	0.8	20
1867	Oct	-13.9	20
1867	Nov	-30.2	14
1867	Dec	-31.8	25
1868	Jan	-29.7	39
1868	Feb	-33.6	28
1868	Mar	-30.6	10
1868	Apr	-19.4	9
1868	May	-3.4	11
1868	Jun	9.8	30
1868	Jul	10.8	34
1868	Aug	9.7	47
1868	Sep	2.2	20
1868	Oct	-9.2	14
1868	Nov	-18.3	29
1868	Dec	-34.2	12
1869	Jan	-37.5	30
1869	Feb	-23.4	7
1869	Mar	-24.5	5
1869	Apr	-13.1	4
1869	May	-4.8	15
1869	Jun	5	26
1869	Jul	13.2	21
1869	Aug	10	56
1869	Sep	0.8	15
1869	Oct	-11.8	26
1869	Nov	-28	15
1869	Dec	-29.6	22
1870	Jan	-35	9
1870	Feb	-37.1	9
1870	Mar	-36.3	22
1870	Apr	-20	17
1870	May	-5.4	16
1870	Jun	7.5	22
1870	Jul	10.5	43
1870	Aug	8.3	30
1870	Sep	0.5	29
1870	Oct	-20.2	19
1870	Nov	-27.5	16
1870	Dec	-29.2	12
1871	Jan	-33.2	7
1871	Feb	-28.2	26
1871	Mar	-29.1	10
1871	Apr	-21.8	8
1871	May	-1.2	21
1871	Jun	11.4	35
1871	Jul	9.8	53
1871	Aug	9.3	30
1871	Sep	1.3	32
1871	Oct	-11.9	15
1871	Nov	-18	25
1871	Dec	-32.6	15
1872	Jan	-31.2	7
1872	Feb	-35.3	15
1872	Mar	-30.5	11
1872	Apr	-21.3	9
1872	May	-8	10
1872	Jun	7.7	19
1872	Jul	8.6	44
1872	Aug	8.2	47
1872	Sep	-0.9	32
1872	Oct	-15.9	15
1872	Nov	-26.3	18
1872	Dec	-33	37
1873	Jan	-29.3	13
1873	Feb	-31	33
1873	Mar	-26.5	9
1873	Apr	-14.6	15
1873	May	-5.9	12
1873	Jun	5.7	14
1873	Jul	15.6	28
1873	Aug	10.3	39
1873	Sep	1.6	16
1873	Oct	-11	11
1873	Nov	-24.1	16
1873	Dec	-35.2	13
1874	Jan	-28.5	12
1874	Feb	-32.6	9
1874	Mar	-28.9	20
1874	Apr	-21.4	6
1874	May	-6.3	13
1874	Jun	7.4	25
1874	Jul	16.6	20
1874	Aug	9.7	34
1874	Sep	1.2	17
1874	Oct	-8.1	26
1874	Nov	-19.1	17
1874	Dec	-33.2	13
1875	Jan	-25.1	19
1875	Feb	-22.9	8
1875	Mar	-27.9	18
1875	Apr	-23.9	14
1875	May	-6.1	10
1875	Jun	5.8	27
1875	Jul	10.2	25
1875	Aug	8.9	38
1875	Sep	2.1	39
1875	Oct	-17	22
1875	Nov	-28	14
1875	Dec	-28.8	15
1876	Jan	-31.6	16
1876	Feb	-30.8	5
1876	Mar	-32.9	15
1876	Apr	-23.3	12
1876	May	-7	12
1876	Jun	9.2	19
1876	Jul	12.3	31
1876	Aug	7.7	28
1876	Sep	-1.4	27
1876	Oct	-16	27
1876	Nov	-30.8	6
1876	Dec	-35.7	19
1877	Jan	-31	11
1877	Feb	-25.9	13
1877	Mar	-33.7	3
1877	Apr	-19.9	12
1877	May	-7	11
1877	Jun	4	16
1877	Jul	9.8	27
1877	Aug	8.4	22
1877	Sep	-3.1	12
1877	Oct	-18.1	33
1877	Nov	-31.9	19
1877	Dec	-29.6	31
1878	Jan	-34	9
1878	Feb	-35.4	8
1878	Mar	-33.6	12
1878	Apr	-19.1	11
1878	May	-5.7	21
1878	Jun	6.6	16
1878	Jul	9.6	45
1878	Aug	8.9	51
1878	Sep	0.4	23
1878	Oct	-14	33
1878	Nov	-20.8	19
1878	Dec	-30	21
1879	Jan	-37.7	12
1879	Feb	-27	12
1879	Mar	-33.7	10
1879	Apr	-17.9	7
1879	May	-4.5	17
1879	Jun	10.9	26
1879	Jul	13.4	39
1879	Aug	7.9	35
1879	Sep	2.1	33
1879	Oct	-11.6	27
1879	Nov	-24.4	8
1879	Dec	-26.6	17
1880	Jan	-30.8	14
1880	Feb	-33.1	22
1880	Mar	-33.5	9
1880	Apr	-18.9	4
1880	May	-6.2	15
1880	Jun	5	20
1880	Jul	11.5	43
1880	Aug	8.2	36
1880	Sep	-2.3	14
1880	Oct	-12	41
1880	Nov	-19.1	21
1880	Dec	-25.2	27
1881	Jan	-26.9	15
1881	Feb	-34.3	10
1881	Mar	-27	7
1881	Apr	-15.2	11
1881	May	-6.2	9
1881	Jun	5	31
1881	Jul	9.8	24
1881	Aug	9.2	34
1881	Sep	-1.8	17
1881	Oct	-20.1	12
1881	Nov	-21.3	30
1881	Dec	-33	20
1882	Jan	-36	6
1882	Feb	-38.3	10
1882	Mar	-31.8	10
1882	Apr	-24.5	5
1882	May	-5.3	14
1882	Jun	7.5	28
1882	Jul	12.9	33
1882	Aug	8.4	40
1882	Sep	-0.8	34
1882	Oct	-14.8	14
1882	Nov	-24.2	14
1882	Dec	-34.7	14
1883	Jan	-32.2	18
1883	Feb	-35	10
1883	Mar	-34.1	16
1883	Apr	-15.9	10
1883	May	-4.4	28
1883	Jun	8.9	27
1883	Jul	13.3	24
1883	Aug	8.7	49
1883	Sep	2.1	38
1883	Oct	-9.1	23
1883	Nov	-18.5	14
1883	Dec	-34.5	19
1884	Jan	-35.5	24
1884	Feb	-38.2	26
1884	Mar	-25.8	10
1884	Apr	-17	6
1884	May	-2.7	15
1884	Jun	9.1	25
1884	Jul	11.8	34
1884	Aug	6.4	40
1884	Sep	0.8	30
1884	Oct	-16.5	13
1884	Nov	-28.4	26
1884	Dec	-32.1	14
1885	Jan	-29.2	19
1885	Feb	-31.9	22
1885	Mar	-29.7	8
1885	Apr	-24.8	6
1885	May	-1.9	13
1885	Jun	10.2	21
1885	Jul	16.3	28
1885	Aug	7.8	30
1885	Sep	0	39
1885	Oct	-8.9	28
1885	Nov	-25.4	20
1885	Dec	-32.9	18
1886	Jan	-27.3	20
1886	Feb	-35	18
1886	Mar	-29.7	17
1886	Apr	-21.2	9
1886	May	-3.7	11
1886	Jun	9.2	27
1886	Jul	12.9	29
1886	Aug	9.5	58
1886	Sep	-0.5	16
1886	Oct	-14.2	18
1886	Nov	-30.8	25
1886	Dec	-35.3	18
1887	Jan	-35	12
1887	Feb	-30	22
1887	Mar	-22.2	6
1887	Apr	-15.7	6
1887	May	-4.7	10
1887	Jun	9.3	28
1887	Jul	8.3	26
1887	Aug	6.7	56
1887	Sep	-0.6	28
1887	Oct	-14.6	28
1887	Nov	-29.3	19
1887	Dec	-35.9	14
1888	Jan	-34.9	5
1888	Feb	-27	17
1888	Mar	-31.9	6
1888	Apr	-23.3	8
1888	May	-3.4	8
1888	Jun	8.3	26
1888	Jul	11.5	19
1888	Aug	9.3	54
1888	Sep	2.1	25
1888	Oct	-8.9	23
1888	Nov	-20.1	25
1888	Dec	-26.5	26
1889	Jan	-29.1	19
1889	Feb	-27.4	16
1889	Mar	-22.3	17
1889	Apr	-20.3	3
1889	May	-5.6	15
1889	Jun	7.3	25
1889	Jul	7.6	46
1889	Aug	6.2	48
1889	Sep	3	37
1889	Oct	-16.2	9
1889	Nov	-30.2	16
1889	Dec	-24.8	25
1890	Jan	-32.2	9
1890	Feb	-27.4	9
1890	Mar	-34.7	5
1890	Apr	-18.1	22
1890	May	-4.8	15
1890	Jun	8.4	25
1890	Jul	12.7	57
1890	Aug	8.5	36
1890	Sep	-1.5	22
1890	Oct	-10.1	21
1890	Nov	-29.2	16
1890	Dec	-26.3	15
1891	Jan	-29.2	26
1891	Feb	-25.9	12
1891	Mar	-21.6	27
1891	Apr	-17.5	8
1891	May	-5.7	8
1891	Jun	5.4	21
1891	Jul	11.4	31
1891	Aug	10.6	28
1891	Sep	3.2	21
1891	Oct	-11.4	21
1891	Nov	-29.9	8
1891	Dec	-34	42
1892	Jan	-35.1	6
1892	Feb	-35.8	7
1892	Mar	-22.3	21
1892	Apr	-22.7	11
1892	May	-5.8	11
1892	Jun	7	25
1892	Jul	8.7	30
1892	Aug	7.9	26
1892	Sep	-0.8	30
1892	Oct	-17.7	18
1892	Nov	-30.1	18
1892	Dec	-29.2	26
1893	Jan	-31.1	16
1893	Feb	-28.2	11
1893	Mar	-23.5	12
1893	Apr	-24.1	5
1893	May	-6.6	15
1893	Jun	7	20
1893	Jul	11.6	34
1893	Aug	10.5	33
1893	Sep	1.5	44
1893	Oct	-11.8	16
1893	Nov	-21.1	16
1893	Dec	-34.9	18
1894	Jan	-37	9
1894	Feb	-29.9	11
1894	Mar	-29.4	10
1894	Apr	-20.9	10
1894	May	-5.4	11
1894	Jun	8.5	9
1894	Jul	14.5	33
1894	Aug	10.7	24
1894	Sep	0	31
1894	Oct	-17.2	22
1894	Nov	-28.5	15
1894	Dec	-34.2	6
1895	Jan	-26.9	19
1895	Feb	-26.8	10
1895	Mar	-34	11
1895	Apr	-26.8	4
1895	May	-6.3	12
1895	Jun	10	28
1895	Jul	9.8	43
1895	Aug	10.2	41
1895	Sep	2	34
1895	Oct	-17.8	19
1895	Nov	-28.3	27
1895	Dec	-34.8	14
1896	Jan	-30.7	20
1896	Feb	-26.6	20
1896	Mar	-33.9	15
1896	Apr	-16.8	17
1896	May	-5.2	19
1896	Jun	8.7	26
1896	Jul	10.8	46
1896	Aug	8.1	23
1896	Sep	0.6	27
1896	Oct	-14	24
1896	Nov	-28.7	29
1896	Dec	-29.3	34
1897	Jan	-27.6	18
1897	Feb	-32.3	9
1897	Mar	-25.7	11
1897	Apr	-16.6	8
1897	May	-4	15
1897	Jun	6.7	32
1897	Jul	9.9	39
1897	Aug	6	37
1897	Sep	-0.2	23
1897	Oct	-13.3	27
1897	Nov	-31.8	17
1897	Dec	-35.6	14
1898	Jan	-33.1	35
1898	Feb	-30.8	19
1898	Mar	-31.2	8
1898	Apr	-14.4	6
1898	May	-7.8	11
1898	Jun	7	30
1898	Jul	16.2	23
1898	Aug	11.1	20
1898	Sep	3	29
1898	Oct	-16.9	14
1898	Nov	-23.4	13
1898	Dec	-25.8	27
1899	Jan	-30.3	13
1899	Feb	-32.5	11
1899	Mar	-29	9
1899	Apr	-18.1	5
1899	May	-4.7	18
1899	Jun	9.7	30
1899	Jul	9.9	46
1899	Aug	9.2	25
1899	Sep	3	53
1899	Oct	-10	20
1899	Nov	-26.6	34
1899	Dec	-32.7	35
1900	Jan	-24.8	20
1900	Feb	-27.7	21
1900	Mar	-30.2	7
1900	Apr	-20.1	11
1900	May	-4.9	12
1900	Jun	10.1	19
1900	Jul	16	17
1900	Aug	7.3	41
1900	Sep	-0.9	15
1900	Oct	-8.2	28
1900	Nov	-21	16
1900	Dec	-21.6	22

## Sheet: NS_Location2_miroc3-2-medres_18
Year	Month	Temperature_C	Precipitation_mm
1850	Jan	-30	30
1850	Feb	-36.8	15
1850	Mar	-28.4	16
1850	Apr	-12.7	13
1850	May	-5	22
1850	Jun	5.9	36
1850	Jul	10.7	37
1850	Aug	8	47
1850	Sep	-0.2	35
1850	Oct	-12.1	35
1850	Nov	-25.2	19
1850	Dec	-24.8	28
1851	Jan	-24.5	31
1851	Feb	-35.9	14
1851	Mar	-34.6	6
1851	Apr	-16.7	13
1851	May	-3.2	33
1851	Jun	10.9	24
1851	Jul	12.9	36
1851	Aug	9.1	32
1851	Sep	3.1	30
1851	Oct	-11.1	19
1851	Nov	-25.9	16
1851	Dec	-28.8	14
1852	Jan	-28.9	18
1852	Feb	-27.9	25
1852	Mar	-24.9	28
1852	Apr	-14.1	8
1852	May	-3.4	11
1852	Jun	12	21
1852	Jul	12.7	42
1852	Aug	7.5	12
1852	Sep	0.1	20
1852	Oct	-12.3	15
1852	Nov	-23.2	17
1852	Dec	-30.9	8
1853	Jan	-24.3	10
1853	Feb	-23.1	14
1853	Mar	-21.7	11
1853	Apr	-14.4	11
1853	May	-4.2	18
1853	Jun	7.7	40
1853	Jul	9.7	40
1853	Aug	6.9	56
1853	Sep	-0.6	49
1853	Oct	-7.3	20
1853	Nov	-23.4	31
1853	Dec	-24.8	12
1854	Jan	-33.6	13
1854	Feb	-26.7	13
1854	Mar	-26.8	12
1854	Apr	-13.4	17
1854	May	-1.8	17
1854	Jun	10.7	30
1854	Jul	11.4	82
1854	Aug	7.5	32
1854	Sep	0.9	19
1854	Oct	-8.8	23
1854	Nov	-23.8	17
1854	Dec	-24.5	45
1855	Jan	-28.1	19
1855	Feb	-27.3	17
1855	Mar	-19.8	8
1855	Apr	-17.7	14
1855	May	-3.3	18
1855	Jun	9	26
1855	Jul	11.8	48
1855	Aug	9.8	34
1855	Sep	1.6	29
1855	Oct	-10.6	32
1855	Nov	-25.8	10
1855	Dec	-33.2	17
1856	Jan	-30.1	13
1856	Feb	-32.8	10
1856	Mar	-32.4	4
1856	Apr	-12.9	9
1856	May	-3.9	21
1856	Jun	6.5	20
1856	Jul	12	41
1856	Aug	6.3	52
1856	Sep	0.2	20
1856	Oct	-16.5	16
1856	Nov	-28.6	16
1856	Dec	-31.9	29
1857	Jan	-32.4	9
1857	Feb	-24.4	25
1857	Mar	-26.2	9
1857	Apr	-15.8	6
1857	May	-3	13
1857	Jun	8.6	15
1857	Jul	12.6	31
1857	Aug	9.1	43
1857	Sep	3	40
1857	Oct	-10.4	29
1857	Nov	-22.4	27
1857	Dec	-25.7	14
1858	Jan	-25.8	11
1858	Feb	-26.3	5
1858	Mar	-29.1	10
1858	Apr	-18.3	19
1858	May	-3.3	11
1858	Jun	10.5	32
1858	Jul	14.1	27
1858	Aug	13	26
1858	Sep	3.1	32
1858	Oct	-9.7	29
1858	Nov	-20.8	12
1858	Dec	-26.5	18
1859	Jan	-35.9	9
1859	Feb	-28.6	17
1859	Mar	-28	12
1859	Apr	-18.5	12
1859	May	-4.3	13
1859	Jun	6.5	37
1859	Jul	10.5	43
1859	Aug	6.2	42
1859	Sep	0	23
1859	Oct	-11.6	34
1859	Nov	-29	19
1859	Dec	-33.1	15
1860	Jan	-30	8
1860	Feb	-38.1	8
1860	Mar	-22.3	28
1860	Apr	-22.5	5
1860	May	-6.1	14
1860	Jun	5.3	25
1860	Jul	14.3	28
1860	Aug	7.1	39
1860	Sep	2.5	35
1860	Oct	-14.5	27
1860	Nov	-24	22
1860	Dec	-33	26
1861	Jan	-27.8	7
1861	Feb	-29.7	15
1861	Mar	-23.1	29
1861	Apr	-17.3	6
1861	May	-3.4	12
1861	Jun	11	23
1861	Jul	11.7	38
1861	Aug	8.7	34
1861	Sep	0	26
1861	Oct	-13.8	45
1861	Nov	-28.5	9
1861	Dec	-34.9	12
1862	Jan	-29.9	24
1862	Feb	-24.4	10
1862	Mar	-27.9	15
1862	Apr	-18.8	7
1862	May	-6.1	27
1862	Jun	3.7	17
1862	Jul	9.6	33
1862	Aug	4.5	31
1862	Sep	-0.7	41
1862	Oct	-13.6	32
1862	Nov	-28	16
1862	Dec	-30.2	33
1863	Jan	-28.5	9
1863	Feb	-24	12
1863	Mar	-26.9	8
1863	Apr	-14.9	21
1863	May	-4.6	10
1863	Jun	7.4	32
1863	Jul	10.8	39
1863	Aug	10.8	14
1863	Sep	-0.4	41
1863	Oct	-13.1	17
1863	Nov	-20.7	23
1863	Dec	-34.8	14
1864	Jan	-28.5	9
1864	Feb	-32.9	10
1864	Mar	-29.1	14
1864	Apr	-22.3	4
1864	May	-6	12
1864	Jun	8.8	16
1864	Jul	8.8	69
1864	Aug	6.9	26
1864	Sep	0.5	26
1864	Oct	-11.6	21
1864	Nov	-27.9	15
1864	Dec	-28.5	10
1865	Jan	-31.4	10
1865	Feb	-29	8
1865	Mar	-33.3	8
1865	Apr	-20	5
1865	May	-5.1	15
1865	Jun	10.9	26
1865	Jul	10	25
1865	Aug	7.1	40
1865	Sep	-0.2	32
1865	Oct	-14.8	24
1865	Nov	-27.4	19
1865	Dec	-28	24
1866	Jan	-33.1	18
1866	Feb	-33.5	12
1866	Mar	-29.2	9
1866	Apr	-18.1	8
1866	May	-6.7	7
1866	Jun	6.4	33
1866	Jul	11.9	38
1866	Aug	9.3	33
1866	Sep	0.7	37
1866	Oct	-11.1	15
1866	Nov	-27.9	11
1866	Dec	-35.7	10
1867	Jan	-37.1	7
1867	Feb	-32.1	16
1867	Mar	-29.3	7
1867	Apr	-13.5	9
1867	May	-1.7	13
1867	Jun	9.5	38
1867	Jul	11	48
1867	Aug	7.1	26
1867	Sep	2.7	28
1867	Oct	-12.8	38
1867	Nov	-20.2	44
1867	Dec	-24.6	25
1868	Jan	-27.9	7
1868	Feb	-28.9	15
1868	Mar	-31.8	5
1868	Apr	-19.3	10
1868	May	-4.9	15
1868	Jun	9.1	21
1868	Jul	11.2	39
1868	Aug	5.9	39
1868	Sep	1.7	28
1868	Oct	-14.1	16
1868	Nov	-22.3	14
1868	Dec	-25.5	21
1869	Jan	-26.5	21
1869	Feb	-32.3	14
1869	Mar	-22.7	14
1869	Apr	-16	9
1869	May	-3.4	8
1869	Jun	9.6	15
1869	Jul	10.4	44
1869	Aug	9.6	37
1869	Sep	-0.4	18
1869	Oct	-11	36
1869	Nov	-19.8	23
1869	Dec	-26.7	18
1870	Jan	-35.7	6
1870	Feb	-30.6	21
1870	Mar	-24.2	21
1870	Apr	-19.4	10
1870	May	-2.6	20
1870	Jun	8.1	32
1870	Jul	9.5	45
1870	Aug	10.3	17
1870	Sep	1.7	21
1870	Oct	-12.4	29
1870	Nov	-27.8	16
1870	Dec	-34.3	12
1871	Jan	-35.7	12
1871	Feb	-34.6	15
1871	Mar	-33.1	6
1871	Apr	-19.1	18
1871	May	-5	18
1871	Jun	4.9	41
1871	Jul	10.6	45
1871	Aug	8.2	29
1871	Sep	1.4	24
1871	Oct	-12.3	31
1871	Nov	-21.1	19
1871	Dec	-30.3	28
1872	Jan	-31.1	12
1872	Feb	-32.4	13
1872	Mar	-29.4	13
1872	Apr	-13.3	12
1872	May	-2.1	9
1872	Jun	9.3	24
1872	Jul	14.5	29
1872	Aug	8	30
1872	Sep	-1.5	40
1872	Oct	-19.1	8
1872	Nov	-28.7	11
1872	Dec	-23.3	50
1873	Jan	-25.5	22
1873	Feb	-27.7	17
1873	Mar	-24.3	17
1873	Apr	-19.7	14
1873	May	-4.1	10
1873	Jun	6.8	33
1873	Jul	15.8	25
1873	Aug	6.7	41
1873	Sep	-0.4	14
1873	Oct	-10.5	34
1873	Nov	-25.6	32
1873	Dec	-27.4	25
1874	Jan	-24.4	8
1874	Feb	-24.2	16
1874	Mar	-21.2	14
1874	Apr	-12.5	14
1874	May	-2.2	12
1874	Jun	11.9	23
1874	Jul	10.4	62
1874	Aug	8.5	23
1874	Sep	0.9	37
1874	Oct	-11.7	23
1874	Nov	-21.6	16
1874	Dec	-29.5	10
1875	Jan	-27.7	11
1875	Feb	-30.2	18
1875	Mar	-22.3	20
1875	Apr	-19.4	15
1875	May	-3.4	15
1875	Jun	9	25
1875	Jul	10.5	35
1875	Aug	5.6	52
1875	Sep	0.1	48
1875	Oct	-11.7	37
1875	Nov	-22.1	14
1875	Dec	-27.1	22
1876	Jan	-35.1	8
1876	Feb	-34.6	17
1876	Mar	-31.2	11
1876	Apr	-16.3	16
1876	May	-4.8	23
1876	Jun	7.8	23
1876	Jul	11.1	31
1876	Aug	6.7	52
1876	Sep	-0.9	31
1876	Oct	-14.3	20
1876	Nov	-28.8	9
1876	Dec	-32.6	21
1877	Jan	-29.8	9
1877	Feb	-27.5	14
1877	Mar	-21.1	15
1877	Apr	-13.6	31
1877	May	-2.8	30
1877	Jun	6.1	23
1877	Jul	11.2	47
1877	Aug	6.2	53
1877	Sep	-0.2	24
1877	Oct	-13.9	13
1877	Nov	-27.3	26
1877	Dec	-33	16
1878	Jan	-37	5
1878	Feb	-34	17
1878	Mar	-27	9
1878	Apr	-19.5	4
1878	May	-4.5	8
1878	Jun	7.6	37
1878	Jul	10.1	60
1878	Aug	8.1	17
1878	Sep	2.8	28
1878	Oct	-9	27
1878	Nov	-23	18
1878	Dec	-34.3	10
1879	Jan	-34.1	11
1879	Feb	-29.7	24
1879	Mar	-21.7	19
1879	Apr	-20	11
1879	May	-2.2	16
1879	Jun	5.4	48
1879	Jul	10.1	27
1879	Aug	9.3	43
1879	Sep	0.6	16
1879	Oct	-15.2	17
1879	Nov	-27.5	11
1879	Dec	-30.4	15
1880	Jan	-23.9	11
1880	Feb	-27.3	15
1880	Mar	-23.6	8
1880	Apr	-13.5	9
1880	May	-2.6	22
1880	Jun	12.2	28
1880	Jul	11.8	32
1880	Aug	8.6	46
1880	Sep	0.6	35
1880	Oct	-15.2	24
1880	Nov	-25.4	18
1880	Dec	-23.1	15
1881	Jan	-26.9	13
1881	Feb	-25.7	16
1881	Mar	-26.7	14
1881	Apr	-12.8	12
1881	May	-5.2	8
1881	Jun	8.5	28
1881	Jul	12.5	10
1881	Aug	8.3	40
1881	Sep	1.1	17
1881	Oct	-9.5	21
1881	Nov	-26.4	13
1881	Dec	-28.1	29
1882	Jan	-34.2	5
1882	Feb	-34.5	9
1882	Mar	-23.1	19
1882	Apr	-12.1	17
1882	May	-3.8	6
1882	Jun	9.7	11
1882	Jul	12.1	22
1882	Aug	7.6	42
1882	Sep	2	38
1882	Oct	-9.3	30
1882	Nov	-20.7	17
1882	Dec	-25.8	19
1883	Jan	-25.6	14
1883	Feb	-30.2	17
1883	Mar	-30	11
1883	Apr	-20.1	10
1883	May	-7.4	14
1883	Jun	6.1	17
1883	Jul	15.1	24
1883	Aug	9.4	50
1883	Sep	1.5	37
1883	Oct	-16.6	24
1883	Nov	-24.7	36
1883	Dec	-26.5	13
1884	Jan	-29.4	15
1884	Feb	-30.6	8
1884	Mar	-28.9	18
1884	Apr	-14.9	7
1884	May	-3.3	22
1884	Jun	8	31
1884	Jul	10.1	47
1884	Aug	7.5	37
1884	Sep	1.6	32
1884	Oct	-10.5	24
1884	Nov	-24.1	25
1884	Dec	-24.4	34
1885	Jan	-32.4	6
1885	Feb	-25.2	11
1885	Mar	-20	27
1885	Apr	-13.5	17
1885	May	-2.5	13
1885	Jun	8.3	34
1885	Jul	13	32
1885	Aug	9.3	36
1885	Sep	2.8	39
1885	Oct	-9.8	32
1885	Nov	-23.2	18
1885	Dec	-29.7	18
1886	Jan	-29.6	12
1886	Feb	-27.5	8
1886	Mar	-21.1	40
1886	Apr	-18.9	9
1886	May	-4.1	11
1886	Jun	10.2	44
1886	Jul	10.3	39
1886	Aug	6.4	28
1886	Sep	2.9	24
1886	Oct	-13	15
1886	Nov	-28.3	21
1886	Dec	-27.2	21
1887	Jan	-23.6	15
1887	Feb	-24.4	30
1887	Mar	-22.4	21
1887	Apr	-17.4	18
1887	May	-3.1	6
1887	Jun	9	23
1887	Jul	11.5	46
1887	Aug	11.2	12
1887	Sep	0.7	29
1887	Oct	-14.1	26
1887	Nov	-28.4	26
1887	Dec	-32.4	18
1888	Jan	-24.1	10
1888	Feb	-26.3	12
1888	Mar	-26	15
1888	Apr	-20.2	4
1888	May	-3.4	7
1888	Jun	9.9	32
1888	Jul	11	83
1888	Aug	9.1	46
1888	Sep	1.9	27
1888	Oct	-14.7	22
1888	Nov	-22.8	13
1888	Dec	-22.9	40
1889	Jan	-36.5	12
1889	Feb	-30.7	9
1889	Mar	-23.1	10
1889	Apr	-18	15
1889	May	-1.9	8
1889	Jun	8	22
1889	Jul	12.8	26
1889	Aug	9	38
1889	Sep	0.9	31
1889	Oct	-15.6	23
1889	Nov	-28.1	19
1889	Dec	-27.9	15
1890	Jan	-33	12
1890	Feb	-27.4	16
1890	Mar	-25.5	18
1890	Apr	-16.5	13
1890	May	-1.5	14
1890	Jun	11.8	16
1890	Jul	12	38
1890	Aug	9.4	25
1890	Sep	3.4	22
1890	Oct	-11.8	9
1890	Nov	-20.1	20
1890	Dec	-25.3	9
1891	Jan	-24.9	20
1891	Feb	-26.6	15
1891	Mar	-26.1	11
1891	Apr	-20.6	11
1891	May	-6.3	17
1891	Jun	8.1	22
1891	Jul	15.5	32
1891	Aug	8	43
1891	Sep	3.5	19
1891	Oct	-12.8	28
1891	Nov	-27.2	11
1891	Dec	-27.7	13
1892	Jan	-34.2	12
1892	Feb	-34.1	19
1892	Mar	-26.2	13
1892	Apr	-16.9	14
1892	May	-10	22
1892	Jun	3.2	38
1892	Jul	11.9	34
1892	Aug	7.3	50
1892	Sep	2.8	32
1892	Oct	-16.6	13
1892	Nov	-28.8	13
1892	Dec	-31.6	11
1893	Jan	-27.8	13
1893	Feb	-34.7	8
1893	Mar	-32.3	6
1893	Apr	-14.9	11
1893	May	-4.3	10
1893	Jun	7.8	39
1893	Jul	9.3	53
1893	Aug	8.1	37
1893	Sep	-1.4	33
1893	Oct	-14.2	19
1893	Nov	-21.7	27
1893	Dec	-29.1	12
1894	Jan	-24.9	26
1894	Feb	-25.8	24
1894	Mar	-27.8	18
1894	Apr	-16.8	6
1894	May	-6.8	20
1894	Jun	7.2	16
1894	Jul	15.1	18
1894	Aug	9.5	13
1894	Sep	3.6	20
1894	Oct	-8.5	27
1894	Nov	-20.5	12
1894	Dec	-33.7	18
1895	Jan	-29.7	11
1895	Feb	-24.9	14
1895	Mar	-19.3	13
1895	Apr	-14.4	11
1895	May	-1.5	11
1895	Jun	12.5	20
1895	Jul	13	41
1895	Aug	8.5	35
1895	Sep	0.8	27
1895	Oct	-9.7	24
1895	Nov	-25.8	18
1895	Dec	-28.9	25
1896	Jan	-29.3	12
1896	Feb	-34.2	12
1896	Mar	-22.2	32
1896	Apr	-14.2	16
1896	May	-7.6	15
1896	Jun	5.9	12
1896	Jul	12.4	16
1896	Aug	7.4	24
1896	Sep	1.2	26
1896	Oct	-17	26
1896	Nov	-29.5	17
1896	Dec	-23.7	16
1897	Jan	-37.2	5
1897	Feb	-31.3	13
1897	Mar	-29.4	9
1897	Apr	-17.6	10
1897	May	-5.7	6
1897	Jun	9.3	29
1897	Jul	9.6	33
1897	Aug	7.5	42
1897	Sep	1.9	47
1897	Oct	-18.4	10
1897	Nov	-27.5	25
1897	Dec	-31.8	17
1898	Jan	-30.6	6
1898	Feb	-36.2	18
1898	Mar	-31.1	16
1898	Apr	-18.8	9
1898	May	-2.9	10
1898	Jun	6.5	32
1898	Jul	10.9	55
1898	Aug	9.5	32
1898	Sep	2.7	40
1898	Oct	-9.4	26
1898	Nov	-19.5	24
1898	Dec	-32.2	13
1899	Jan	-29.6	21
1899	Feb	-26.9	17
1899	Mar	-22.8	37
1899	Apr	-21.6	10
1899	May	-2.2	6
1899	Jun	7	34
1899	Jul	12	45
1899	Aug	7.6	54
1899	Sep	2.4	22
1899	Oct	-7.9	28
1899	Nov	-25.4	23
1899	Dec	-29.7	23
1900	Jan	-34.1	10
1900	Feb	-32.2	24
1900	Mar	-24.3	12
1900	Apr	-21.2	6
1900	May	-5.7	9
1900	Jun	9.3	27
1900	Jul	9.1	50
1900	Aug	7.5	54
1900	Sep	1	24
1900	Oct	-15.4	27
1900	Nov	-27.9	11
1900	Dec	-34.9	42

## Sheet: NS_Location2_gfdl-cm2-1_1861-20
Year	Month	Temperature_C	Precipitation_mm
1861	Jan	-25	33
1861	Feb	-25.1	13
1861	Mar	-25.6	19
1861	Apr	-13.5	8
1861	May	-3.3	16
1861	Jun	8.5	7
1861	Jul	11	39
1861	Aug	8.8	33
1861	Sep	1.2	17
1861	Oct	-10.2	44
1861	Nov	-18.4	16
1861	Dec	-22.6	11
1862	Jan	-24.2	19
1862	Feb	-33.5	9
1862	Mar	-25.6	22
1862	Apr	-21.7	7
1862	May	-5.4	8
1862	Jun	8.4	51
1862	Jul	8.5	46
1862	Aug	9.6	35
1862	Sep	-0.3	16
1862	Oct	-11.2	30
1862	Nov	-20.9	27
1862	Dec	-35.8	13
1863	Jan	-20.5	37
1863	Feb	-33.6	6
1863	Mar	-24.5	13
1863	Apr	-26.1	6
1863	May	-9.9	9
1863	Jun	10.5	19
1863	Jul	12.3	45
1863	Aug	10	23
1863	Sep	0.9	32
1863	Oct	-15.5	40
1863	Nov	-21	18
1863	Dec	-21.3	20
1864	Jan	-23.5	19
1864	Feb	-25.7	13
1864	Mar	-25.7	10
1864	Apr	-21.4	20
1864	May	-3.6	7
1864	Jun	11.2	3
1864	Jul	10.4	9
1864	Aug	7.6	43
1864	Sep	1.4	19
1864	Oct	-12.1	27
1864	Nov	-22.7	18
1864	Dec	-27	17
1865	Jan	-33.9	10
1865	Feb	-24.4	16
1865	Mar	-29.8	15
1865	Apr	-17.3	13
1865	May	-8.2	16
1865	Jun	11.5	17
1865	Jul	12.8	67
1865	Aug	10.1	23
1865	Sep	1.6	21
1865	Oct	-12.7	12
1865	Nov	-28	14
1865	Dec	-27	27
1866	Jan	-34.4	15
1866	Feb	-27.2	17
1866	Mar	-32.9	9
1866	Apr	-20.8	10
1866	May	-0.9	11
1866	Jun	11.2	18
1866	Jul	10.2	50
1866	Aug	7	34
1866	Sep	-0.1	27
1866	Oct	-14.5	30
1866	Nov	-25.6	23
1866	Dec	-32.8	31
1867	Jan	-23	30
1867	Feb	-26.7	23
1867	Mar	-26.3	9
1867	Apr	-15	9
1867	May	-7.2	19
1867	Jun	10.1	20
1867	Jul	12.1	44
1867	Aug	11.8	32
1867	Sep	1.8	27
1867	Oct	-11.6	24
1867	Nov	-24.7	19
1867	Dec	-25.1	33
1868	Jan	-24.2	26
1868	Feb	-38	14
1868	Mar	-33.7	3
1868	Apr	-15.4	9
1868	May	-4.4	17
1868	Jun	10.1	25
1868	Jul	9.7	44
1868	Aug	10.2	37
1868	Sep	0.6	21
1868	Oct	-17.1	21
1868	Nov	-26.2	28
1868	Dec	-28.4	23
1869	Jan	-29.2	7
1869	Feb	-28.4	30
1869	Mar	-36.1	3
1869	Apr	-14.2	17
1869	May	-4.5	13
1869	Jun	8	61
1869	Jul	12.5	33
1869	Aug	9.4	31
1869	Sep	1.1	35
1869	Oct	-11.3	27
1869	Nov	-27.3	7
1869	Dec	-30.7	15
1870	Jan	-30	6
1870	Feb	-24.9	15
1870	Mar	-25.4	10
1870	Apr	-13.8	7
1870	May	-7.2	13
1870	Jun	5.5	38
1870	Jul	10.2	39
1870	Aug	8.7	19
1870	Sep	-0.9	25
1870	Oct	-15.5	28
1870	Nov	-29.2	11
1870	Dec	-27.6	13
1871	Jan	-28.2	13
1871	Feb	-29	28
1871	Mar	-31.3	12
1871	Apr	-17.5	16
1871	May	-7	30
1871	Jun	6.7	6
1871	Jul	10.9	43
1871	Aug	8.8	21
1871	Sep	1	22
1871	Oct	-8.2	32
1871	Nov	-28.4	16
1871	Dec	-26.2	37
1872	Jan	-20.6	27
1872	Feb	-18.9	15
1872	Mar	-23.2	10
1872	Apr	-14.6	16
1872	May	-6	14
1872	Jun	6.7	55
1872	Jul	12	43
1872	Aug	8.3	27
1872	Sep	0.9	25
1872	Oct	-9.5	24
1872	Nov	-22	19
1872	Dec	-29.7	16
1873	Jan	-34.6	7
1873	Feb	-41.3	7
1873	Mar	-36.1	7
1873	Apr	-18.1	16
1873	May	-4.1	19
1873	Jun	11.1	15
1873	Jul	11.9	36
1873	Aug	9.7	15
1873	Sep	-1.7	36
1873	Oct	-14.2	17
1873	Nov	-28.3	20
1873	Dec	-31.8	15
1874	Jan	-25.9	32
1874	Feb	-29.8	17
1874	Mar	-27.5	8
1874	Apr	-15.3	14
1874	May	-5.1	6
1874	Jun	10.9	48
1874	Jul	13.2	25
1874	Aug	7.3	25
1874	Sep	-2.8	21
1874	Oct	-12.7	38
1874	Nov	-20.9	18
1874	Dec	-30.5	8
1875	Jan	-31.4	12
1875	Feb	-29.3	16
1875	Mar	-31.1	24
1875	Apr	-17.1	12
1875	May	-7.6	17
1875	Jun	8.8	43
1875	Jul	10.6	33
1875	Aug	8.4	29
1875	Sep	-1.9	31
1875	Oct	-16.1	41
1875	Nov	-29.3	19
1875	Dec	-28	17
1876	Jan	-31.2	9
1876	Feb	-24.6	20
1876	Mar	-26.4	13
1876	Apr	-23.3	7
1876	May	-3.8	29
1876	Jun	8.7	12
1876	Jul	9	29
1876	Aug	10	25
1876	Sep	1.9	17
1876	Oct	-11.1	26
1876	Nov	-19.3	13
1876	Dec	-29.3	25
1877	Jan	-35.8	23
1877	Feb	-36.5	19
1877	Mar	-31.3	13
1877	Apr	-19.7	18
1877	May	-1.8	23
1877	Jun	7.3	27
1877	Jul	12.4	27
1877	Aug	8.5	42
1877	Sep	-2.6	23
1877	Oct	-9.5	37
1877	Nov	-24.5	14
1877	Dec	-27.5	14
1878	Jan	-21.3	17
1878	Feb	-24.9	25
1878	Mar	-31.6	5
1878	Apr	-20.2	15
1878	May	-8.4	9
1878	Jun	9.8	42
1878	Jul	8.6	28
1878	Aug	10.1	24
1878	Sep	0.8	26
1878	Oct	-14.9	18
1878	Nov	-26.8	17
1878	Dec	-25.2	24
1879	Jan	-38.4	8
1879	Feb	-39.1	12
1879	Mar	-24.4	14
1879	Apr	-16.4	8
1879	May	-2.3	18
1879	Jun	11.8	15
1879	Jul	14.5	44
1879	Aug	9.6	25
1879	Sep	1.2	22
1879	Oct	-13.5	19
1879	Nov	-23.7	23
1879	Dec	-24	18
1880	Jan	-27.2	27
1880	Feb	-33.5	2
1880	Mar	-29.1	15
1880	Apr	-12.1	10
1880	May	-1.9	14
1880	Jun	9.8	12
1880	Jul	13.3	27
1880	Aug	6.4	41
1880	Sep	-0.2	32
1880	Oct	-11.1	14
1880	Nov	-20.9	26
1880	Dec	-24.7	19
1881	Jan	-30.4	25
1881	Feb	-36.5	18
1881	Mar	-19.9	16
1881	Apr	-14.5	11
1881	May	-5.7	9
1881	Jun	9.2	17
1881	Jul	13.4	49
1881	Aug	10.6	31
1881	Sep	1.2	33
1881	Oct	-9.9	20
1881	Nov	-22	18
1881	Dec	-29.2	7
1882	Jan	-27.4	26
1882	Feb	-41.4	12
1882	Mar	-31.5	12
1882	Apr	-15.2	11
1882	May	-7	19
1882	Jun	5	33
1882	Jul	9	28
1882	Aug	8.7	35
1882	Sep	0	41
1882	Oct	-16.6	24
1882	Nov	-26.9	11
1882	Dec	-31.2	29
1883	Jan	-27	9
1883	Feb	-26.2	15
1883	Mar	-29.4	2
1883	Apr	-13.5	8
1883	May	-0.6	17
1883	Jun	7.3	76
1883	Jul	8.1	43
1883	Aug	10.5	22
1883	Sep	-1.7	20
1883	Oct	-10.8	25
1883	Nov	-23.6	29
1883	Dec	-21.8	24
1884	Jan	-23.9	24
1884	Feb	-28.6	29
1884	Mar	-23.7	23
1884	Apr	-22.6	19
1884	May	-6.2	10
1884	Jun	6.1	14
1884	Jul	7.5	65
1884	Aug	10.2	38
1884	Sep	1.4	24
1884	Oct	-18.5	16
1884	Nov	-28	18
1884	Dec	-29.9	26
1885	Jan	-40.3	9
1885	Feb	-33.7	8
1885	Mar	-33.6	4
1885	Apr	-19.7	8
1885	May	-6.2	23
1885	Jun	8.2	14
1885	Jul	11.3	29
1885	Aug	7.4	27
1885	Sep	0.9	23
1885	Oct	-15.3	26
1885	Nov	-29.3	14
1885	Dec	-27.3	26
1886	Jan	-27.6	23
1886	Feb	-35	12
1886	Mar	-27.1	14
1886	Apr	-18.7	9
1886	May	-7.1	19
1886	Jun	5.1	55
1886	Jul	9.1	27
1886	Aug	8.2	25
1886	Sep	-0.7	21
1886	Oct	-14.6	29
1886	Nov	-29.5	20
1886	Dec	-31.7	23
1887	Jan	-37.1	5
1887	Feb	-39.2	7
1887	Mar	-34	5
1887	Apr	-25.8	12
1887	May	-8	27
1887	Jun	3.5	17
1887	Jul	15.5	37
1887	Aug	6	47
1887	Sep	-0.7	21
1887	Oct	-14.8	28
1887	Nov	-24.1	13
1887	Dec	-24	18
1888	Jan	-38.3	29
1888	Feb	-29.4	16
1888	Mar	-35	19
1888	Apr	-18.8	18
1888	May	-11.1	16
1888	Jun	6	6
1888	Jul	15.1	15
1888	Aug	8.9	14
1888	Sep	-3.2	18
1888	Oct	-20	29
1888	Nov	-31.9	12
1888	Dec	-34.7	29
1889	Jan	-35.7	8
1889	Feb	-28.3	32
1889	Mar	-27.4	15
1889	Apr	-19.4	14
1889	May	-7.2	11
1889	Jun	10.3	35
1889	Jul	10.3	25
1889	Aug	9.3	33
1889	Sep	-0.2	16
1889	Oct	-12.6	12
1889	Nov	-26.3	8
1889	Dec	-26.9	22
1890	Jan	-26	23
1890	Feb	-24.2	23
1890	Mar	-20.2	16
1890	Apr	-13.9	13
1890	May	-0.9	5
1890	Jun	11.4	25
1890	Jul	17.5	21
1890	Aug	9.1	18
1890	Sep	2.9	19
1890	Oct	-11.2	32
1890	Nov	-29.4	12
1890	Dec	-36	17
1891	Jan	-34.1	18
1891	Feb	-40.9	6
1891	Mar	-35.5	12
1891	Apr	-19.9	18
1891	May	-5.6	21
1891	Jun	9.7	12
1891	Jul	8.8	42
1891	Aug	9.2	20
1891	Sep	-0.3	19
1891	Oct	-18.2	36
1891	Nov	-26.1	25
1891	Dec	-34.8	12
1892	Jan	-31.8	16
1892	Feb	-37.5	11
1892	Mar	-23.9	24
1892	Apr	-21.7	10
1892	May	-4.8	13
1892	Jun	7.7	20
1892	Jul	8.4	10
1892	Aug	7.1	12
1892	Sep	-0.5	25
1892	Oct	-12.4	27
1892	Nov	-21.7	15
1892	Dec	-32.8	10
1893	Jan	-31	11
1893	Feb	-34.5	7
1893	Mar	-35	9
1893	Apr	-17.7	18
1893	May	-6.6	12
1893	Jun	4.6	13
1893	Jul	11.1	39
1893	Aug	8.8	22
1893	Sep	0	25
1893	Oct	-18.1	42
1893	Nov	-29.5	30
1893	Dec	-31.7	32
1894	Jan	-32.6	12
1894	Feb	-33	30
1894	Mar	-29.3	22
1894	Apr	-19	8
1894	May	-7.7	14
1894	Jun	5.2	33
1894	Jul	11.6	24
1894	Aug	7.1	33
1894	Sep	0.7	22
1894	Oct	-14.5	22
1894	Nov	-24.2	16
1894	Dec	-29.5	43
1895	Jan	-34.9	8
1895	Feb	-28.5	21
1895	Mar	-25.2	16
1895	Apr	-15.5	13
1895	May	-4.9	12
1895	Jun	11.6	7
1895	Jul	12.6	68
1895	Aug	9.8	39
1895	Sep	2.5	31
1895	Oct	-8.6	33
1895	Nov	-16.9	28
1895	Dec	-26.6	22
1896	Jan	-24.2	16
1896	Feb	-29	12
1896	Mar	-24.3	12
1896	Apr	-14.4	10
1896	May	-2.1	10
1896	Jun	8.6	18
1896	Jul	10.8	19
1896	Aug	10.4	26
1896	Sep	0.5	16
1896	Oct	-15.7	16
1896	Nov	-21.2	24
1896	Dec	-27.1	13
1897	Jan	-22.7	8
1897	Feb	-26	12
1897	Mar	-28.3	11
1897	Apr	-14.1	16
1897	May	-6.8	14
1897	Jun	11.8	27
1897	Jul	12.6	19
1897	Aug	10.5	37
1897	Sep	2.5	31
1897	Oct	-12.5	20
1897	Nov	-23.7	8
1897	Dec	-30.7	24
1898	Jan	-35.1	18
1898	Feb	-26.8	21
1898	Mar	-27.7	4
1898	Apr	-12.3	4
1898	May	-3	15
1898	Jun	10.7	38
1898	Jul	15.1	52
1898	Aug	11.6	17
1898	Sep	1.8	34
1898	Oct	-10.8	21
1898	Nov	-24.1	31
1898	Dec	-28.5	20
1899	Jan	-36.3	26
1899	Feb	-30.7	22
1899	Mar	-26.9	18
1899	Apr	-13.7	9
1899	May	-2.1	12
1899	Jun	8.3	3
1899	Jul	8.3	44
1899	Aug	7.8	36
1899	Sep	0.7	20
1899	Oct	-14.2	18
1899	Nov	-20.5	30
1899	Dec	-22.8	19
1900	Jan	-32.3	14
1900	Feb	-31.2	14
1900	Mar	-33.4	17
1900	Apr	-25.6	7
1900	May	-5.4	18
1900	Jun	10.5	30
1900	Jul	11.4	44
1900	Aug	6.9	34
1900	Sep	-2.6	23
1900	Oct	-11.1	32
1900	Nov	-29	8
1900	Dec	-35.4	6

## Sheet: NS_Location2_cccma_1850-2000_te
Year	Month	Temperature_C	Precipitation_mm
1850	Jan	-37.3	5
1850	Feb	-31.8	16
1850	Mar	-26.8	8
1850	Apr	-22.5	12
1850	May	-4	6
1850	Jun	8	13
1850	Jul	9.4	34
1850	Aug	9.8	39
1850	Sep	0.3	28
1850	Oct	-11.2	49
1850	Nov	-26	8
1850	Dec	-30.9	15
1851	Jan	-28.2	17
1851	Feb	-33.5	12
1851	Mar	-31.2	9
1851	Apr	-15.6	11
1851	May	-7.6	5
1851	Jun	6.4	26
1851	Jul	7.1	36
1851	Aug	4.3	49
1851	Sep	0	9
1851	Oct	-10.8	20
1851	Nov	-22.4	20
1851	Dec	-36.8	9
1852	Jan	-37.6	8
1852	Feb	-39.8	5
1852	Mar	-37.1	4
1852	Apr	-19.1	15
1852	May	-6	13
1852	Jun	8.3	33
1852	Jul	9.6	17
1852	Aug	6.9	19
1852	Sep	-1.7	12
1852	Oct	-12.6	29
1852	Nov	-29.6	19
1852	Dec	-39.3	11
1853	Jan	-40.1	5
1853	Feb	-35.9	10
1853	Mar	-24.4	13
1853	Apr	-17.7	14
1853	May	-3.1	17
1853	Jun	8.3	15
1853	Jul	9.7	33
1853	Aug	6.6	28
1853	Sep	-2.7	18
1853	Oct	-15.8	18
1853	Nov	-25.5	22
1853	Dec	-29.7	21
1854	Jan	-24.9	17
1854	Feb	-36.3	6
1854	Mar	-26.6	20
1854	Apr	-17	8
1854	May	-2.3	9
1854	Jun	4.5	59
1854	Jul	10.7	23
1854	Aug	8.5	38
1854	Sep	-5	38
1854	Oct	-20.2	16
1854	Nov	-30.8	18
1854	Dec	-38.6	7
1855	Jan	-37.1	4
1855	Feb	-25.1	12
1855	Mar	-30.8	4
1855	Apr	-15.7	8
1855	May	-3.8	13
1855	Jun	7.8	30
1855	Jul	12.9	31
1855	Aug	7.6	20
1855	Sep	-4.7	13
1855	Oct	-16.8	26
1855	Nov	-31.8	15
1855	Dec	-37	17
1856	Jan	-28.8	16
1856	Feb	-34.6	12
1856	Mar	-27.7	8
1856	Apr	-15.3	6
1856	May	-1.6	12
1856	Jun	9.9	36
1856	Jul	9.5	33
1856	Aug	4.6	38
1856	Sep	-0.6	24
1856	Oct	-12.9	17
1856	Nov	-24.1	12
1856	Dec	-38.2	6
1857	Jan	-39.1	13
1857	Feb	-36	27
1857	Mar	-28	17
1857	Apr	-19.2	7
1857	May	-2.9	8
1857	Jun	6.6	46
1857	Jul	9.2	54
1857	Aug	4.6	26
1857	Sep	-0.1	12
1857	Oct	-10.1	29
1857	Nov	-27.2	15
1857	Dec	-32.2	33
1858	Jan	-38.3	9
1858	Feb	-26.7	16
1858	Mar	-33.7	10
1858	Apr	-15.3	8
1858	May	-5.3	13
1858	Jun	8.9	31
1858	Jul	9	27
1858	Aug	7	31
1858	Sep	1.6	25
1858	Oct	-7.3	54
1858	Nov	-29.3	13
1858	Dec	-33.6	35
1859	Jan	-23.6	26
1859	Feb	-37.7	9
1859	Mar	-30.6	10
1859	Apr	-21.7	8
1859	May	-0.7	6
1859	Jun	6.5	30
1859	Jul	11	19
1859	Aug	6.4	29
1859	Sep	0	19
1859	Oct	-11.9	36
1859	Nov	-26.5	27
1859	Dec	-28.6	21
1860	Jan	-22.1	23
1860	Feb	-33.3	3
1860	Mar	-26.7	19
1860	Apr	-15.9	9
1860	May	-3.6	12
1860	Jun	7.6	15
1860	Jul	11.5	36
1860	Aug	10.1	29
1860	Sep	-1.3	9
1860	Oct	-14	22
1860	Nov	-27.7	10
1860	Dec	-28	27
1861	Jan	-27.7	30
1861	Feb	-30.6	17
1861	Mar	-30.6	15
1861	Apr	-18.6	9
1861	May	-3.6	14
1861	Jun	6.3	27
1861	Jul	11.6	28
1861	Aug	8.3	37
1861	Sep	3.4	30
1861	Oct	-11.4	33
1861	Nov	-26.2	15
1861	Dec	-36.1	16
1862	Jan	-30.5	14
1862	Feb	-41.8	7
1862	Mar	-26.7	6
1862	Apr	-23.2	8
1862	May	-3.8	14
1862	Jun	8	25
1862	Jul	12.2	39
1862	Aug	6.2	33
1862	Sep	2.5	19
1862	Oct	-11.7	29
1862	Nov	-19.6	17
1862	Dec	-30.9	31
1863	Jan	-36.6	5
1863	Feb	-27.7	29
1863	Mar	-27.9	12
1863	Apr	-17.1	12
1863	May	-6.7	9
1863	Jun	6.5	17
1863	Jul	9.4	52
1863	Aug	5.3	49
1863	Sep	0.8	44
1863	Oct	-10.7	24
1863	Nov	-20.1	28
1863	Dec	-38.1	11
1864	Jan	-28.4	20
1864	Feb	-25.7	21
1864	Mar	-28.2	6
1864	Apr	-17.9	6
1864	May	-5	12
1864	Jun	5.5	21
1864	Jul	8.9	28
1864	Aug	3.6	27
1864	Sep	0.1	24
1864	Oct	-9.8	28
1864	Nov	-21.5	12
1864	Dec	-38.5	12
1865	Jan	-32.9	11
1865	Feb	-32.9	17
1865	Mar	-29.5	15
1865	Apr	-23.2	3
1865	May	-6.5	11
1865	Jun	8.1	23
1865	Jul	9.9	30
1865	Aug	8.8	45
1865	Sep	-0.7	25
1865	Oct	-14.3	13
1865	Nov	-24.4	30
1865	Dec	-31.3	19
1866	Jan	-35.9	5
1866	Feb	-34.4	14
1866	Mar	-35.4	6
1866	Apr	-16.6	21
1866	May	-2.1	15
1866	Jun	7.2	27
1866	Jul	11.2	36
1866	Aug	7.7	28
1866	Sep	-5.4	19
1866	Oct	-18.8	13
1866	Nov	-24	20
1866	Dec	-37.7	15
1867	Jan	-25.9	20
1867	Feb	-39	5
1867	Mar	-29.4	7
1867	Apr	-13.6	7
1867	May	-5.4	29
1867	Jun	7.5	22
1867	Jul	12.5	23
1867	Aug	9.4	24
1867	Sep	-3.1	32
1867	Oct	-11	36
1867	Nov	-19	16
1867	Dec	-35.5	13
1868	Jan	-29.5	11
1868	Feb	-25.5	26
1868	Mar	-31.5	11
1868	Apr	-22.3	20
1868	May	-5.2	6
1868	Jun	9.9	29
1868	Jul	10.8	32
1868	Aug	7.5	37
1868	Sep	1	21
1868	Oct	-9.9	16
1868	Nov	-30.7	14
1868	Dec	-29.4	17
1869	Jan	-36.3	9
1869	Feb	-35.3	15
1869	Mar	-28.6	20
1869	Apr	-22.3	5
1869	May	-6.5	20
1869	Jun	9.3	27
1869	Jul	12.1	46
1869	Aug	5.5	25
1869	Sep	0.7	21
1869	Oct	-12	14
1869	Nov	-22.1	26
1869	Dec	-31.7	14
1870	Jan	-35.3	10
1870	Feb	-25.2	6
1870	Mar	-32.9	9
1870	Apr	-23	9
1870	May	-11	8
1870	Jun	7.8	33
1870	Jul	9.1	33
1870	Aug	8.6	29
1870	Sep	-5.1	16
1870	Oct	-14.3	14
1870	Nov	-27.5	23
1870	Dec	-39.4	15
1871	Jan	-29.8	5
1871	Feb	-30.1	9
1871	Mar	-31.9	4
1871	Apr	-17	6
1871	May	-5.6	20
1871	Jun	7.9	22
1871	Jul	8.6	29
1871	Aug	9.1	23
1871	Sep	2.5	32
1871	Oct	-9.9	37
1871	Nov	-26.3	17
1871	Dec	-31.1	21
1872	Jan	-24.8	36
1872	Feb	-38.5	9
1872	Mar	-28.1	12
1872	Apr	-16.6	8
1872	May	-6.6	13
1872	Jun	8.9	26
1872	Jul	9.4	30
1872	Aug	7.6	37
1872	Sep	0.7	20
1872	Oct	-10.7	25
1872	Nov	-21.4	15
1872	Dec	-32.4	18
1873	Jan	-25.1	18
1873	Feb	-33.3	11
1873	Mar	-30.8	19
1873	Apr	-18.2	7
1873	May	-2.6	5
1873	Jun	6.9	30
1873	Jul	9.9	27
1873	Aug	6.9	30
1873	Sep	1.5	19
1873	Oct	-8.6	14
1873	Nov	-24.2	35
1873	Dec	-40.7	8
1874	Jan	-27	14
1874	Feb	-27.9	28
1874	Mar	-35.7	6
1874	Apr	-18.8	3
1874	May	-5.4	6
1874	Jun	7.5	16
1874	Jul	10.6	42
1874	Aug	6.2	30
1874	Sep	-0.9	20
1874	Oct	-10.6	23
1874	Nov	-17.3	43
1874	Dec	-33.5	9
1875	Jan	-23.5	10
1875	Feb	-30	13
1875	Mar	-30.6	8
1875	Apr	-15.9	15
1875	May	-7.7	9
1875	Jun	8	29
1875	Jul	8.9	36
1875	Aug	7.5	16
1875	Sep	-1.5	9
1875	Oct	-12.4	19
1875	Nov	-32.1	22
1875	Dec	-31.8	19
1876	Jan	-31.3	5
1876	Feb	-28.6	6
1876	Mar	-33.3	8
1876	Apr	-18.6	13
1876	May	-2.4	8
1876	Jun	6.5	35
1876	Jul	10.1	42
1876	Aug	8.8	29
1876	Sep	0	31
1876	Oct	-14.1	14
1876	Nov	-27.1	13
1876	Dec	-35	40
1877	Jan	-36.1	14
1877	Feb	-25.1	13
1877	Mar	-32	6
1877	Apr	-16.7	12
1877	May	-7.2	13
1877	Jun	7.2	18
1877	Jul	9.1	43
1877	Aug	8.8	26
1877	Sep	-1.2	22
1877	Oct	-16.8	23
1877	Nov	-27.6	23
1877	Dec	-38.1	9
1878	Jan	-27.4	18
1878	Feb	-43.2	8
1878	Mar	-25.8	10
1878	Apr	-21.3	9
1878	May	-4.1	14
1878	Jun	7.8	30
1878	Jul	8.2	39
1878	Aug	2.6	45
1878	Sep	-3.1	14
1878	Oct	-13.3	17
1878	Nov	-25.4	11
1878	Dec	-36.1	14
1879	Jan	-24.6	9
1879	Feb	-29.7	14
1879	Mar	-30.4	6
1879	Apr	-23.5	6
1879	May	-7.1	8
1879	Jun	6.9	41
1879	Jul	10.1	29
1879	Aug	8.5	24
1879	Sep	-1.6	10
1879	Oct	-15.3	20
1879	Nov	-25.4	22
1879	Dec	-36.3	18
1880	Jan	-25.1	33
1880	Feb	-40.3	13
1880	Mar	-27.2	12
1880	Apr	-20.4	6
1880	May	-5	4
1880	Jun	9.3	24
1880	Jul	10.2	40
1880	Aug	4	50
1880	Sep	3.5	19
1880	Oct	-9	31
1880	Nov	-22.4	15
1880	Dec	-28.5	14
1881	Jan	-32.1	13
1881	Feb	-31.6	17
1881	Mar	-36.1	13
1881	Apr	-18.1	5
1881	May	-3	15
1881	Jun	6.4	43
1881	Jul	9	28
1881	Aug	9.3	19
1881	Sep	1.1	15
1881	Oct	-13.8	18
1881	Nov	-18.4	15
1881	Dec	-27.6	13
1882	Jan	-26.6	9
1882	Feb	-28.7	12
1882	Mar	-27.6	9
1882	Apr	-14.4	8
1882	May	-3.8	17
1882	Jun	7.6	28
1882	Jul	9.1	46
1882	Aug	7.2	35
1882	Sep	-2.6	34
1882	Oct	-15.6	18
1882	Nov	-29.9	19
1882	Dec	-36.1	12
1883	Jan	-24.2	30
1883	Feb	-35.8	14
1883	Mar	-24.7	15
1883	Apr	-17.3	9
1883	May	-4.1	14
1883	Jun	7.4	41
1883	Jul	11.1	38
1883	Aug	7.9	31
1883	Sep	-1.7	18
1883	Oct	-15.6	23
1883	Nov	-23.7	22
1883	Dec	-30.2	14
1884	Jan	-35.8	7
1884	Feb	-29.8	11
1884	Mar	-24.1	7
1884	Apr	-19.3	10
1884	May	-9.4	14
1884	Jun	9.2	23
1884	Jul	12.3	34
1884	Aug	9.7	38
1884	Sep	-0.4	18
1884	Oct	-11.8	36
1884	Nov	-26.1	24
1884	Dec	-21	26
1885	Jan	-25.1	27
1885	Feb	-37.6	10
1885	Mar	-32.1	6
1885	Apr	-20	11
1885	May	-4.2	36
1885	Jun	9	22
1885	Jul	12.9	31
1885	Aug	6.9	50
1885	Sep	-0.6	28
1885	Oct	-9.1	26
1885	Nov	-21.5	14
1885	Dec	-31.3	31
1886	Jan	-33.1	26
1886	Feb	-31.8	14
1886	Mar	-28.7	6
1886	Apr	-18.9	24
1886	May	-4.2	13
1886	Jun	8.7	23
1886	Jul	10.2	36
1886	Aug	5.9	28
1886	Sep	-0.1	15
1886	Oct	-19.3	10
1886	Nov	-27.5	17
1886	Dec	-29.2	25
1887	Jan	-33	7
1887	Feb	-40.8	4
1887	Mar	-37	9
1887	Apr	-20	13
1887	May	-8.8	11
1887	Jun	8.6	32
1887	Jul	9.4	45
1887	Aug	9.7	35
1887	Sep	1.3	34
1887	Oct	-7.3	33
1887	Nov	-26.8	16
1887	Dec	-28.2	18
1888	Jan	-23.3	16
1888	Feb	-27	6
1888	Mar	-25.8	12
1888	Apr	-16.3	11
1888	May	-6	14
1888	Jun	7.1	28
1888	Jul	7.8	22
1888	Aug	7.1	16
1888	Sep	1.7	28
1888	Oct	-14	43
1888	Nov	-25.5	22
1888	Dec	-37.8	9
1889	Jan	-39.4	6
1889	Feb	-26.5	3
1889	Mar	-28.5	10
1889	Apr	-17.7	19
1889	May	-4.7	12
1889	Jun	6.5	27
1889	Jul	9.3	27
1889	Aug	5.5	31
1889	Sep	-0.7	39
1889	Oct	-11.8	30
1889	Nov	-24.8	13
1889	Dec	-25	25
1890	Jan	-34.2	15
1890	Feb	-29.1	15
1890	Mar	-32.1	15
1890	Apr	-21.3	6
1890	May	-4.1	15
1890	Jun	10	26
1890	Jul	12	25
1890	Aug	6.8	30
1890	Sep	-2.2	30
1890	Oct	-11.4	16
1890	Nov	-31.1	10
1890	Dec	-35.3	15
1891	Jan	-26.3	18
1891	Feb	-32.7	31
1891	Mar	-25.6	13
1891	Apr	-18.2	8
1891	May	-7	11
1891	Jun	7.7	20
1891	Jul	8.2	38
1891	Aug	7.4	30
1891	Sep	0.2	44
1891	Oct	-15.1	23
1891	Nov	-19.6	29
1891	Dec	-32	12
1892	Jan	-37.4	4
1892	Feb	-37.1	9
1892	Mar	-22.4	9
1892	Apr	-19.8	6
1892	May	-5.2	9
1892	Jun	8.1	12
1892	Jul	12.1	42
1892	Aug	3.9	61
1892	Sep	-1.4	19
1892	Oct	-12.3	23
1892	Nov	-24.1	29
1892	Dec	-28	25
1893	Jan	-25.9	12
1893	Feb	-34	18
1893	Mar	-24.7	16
1893	Apr	-20.8	9
1893	May	-7.4	19
1893	Jun	8.5	14
1893	Jul	10.6	26
1893	Aug	9.1	23
1893	Sep	2.2	18
1893	Oct	-11.6	16
1893	Nov	-25.1	24
1893	Dec	-29.6	29
1894	Jan	-24.6	15
1894	Feb	-34.7	11
1894	Mar	-32	3
1894	Apr	-19.4	6
1894	May	-5.3	7
1894	Jun	7.7	28
1894	Jul	13.9	28
1894	Aug	8.3	39
1894	Sep	-5.2	23
1894	Oct	-18.5	17
1894	Nov	-26.7	20
1894	Dec	-28	21
1895	Jan	-23.5	19
1895	Feb	-34.3	8
1895	Mar	-26.4	28
1895	Apr	-13	8
1895	May	-3.7	17
1895	Jun	9.3	22
1895	Jul	9.5	51
1895	Aug	7.8	26
1895	Sep	0	26
1895	Oct	-9.7	60
1895	Nov	-21.3	22
1895	Dec	-31.5	12
1896	Jan	-23.2	17
1896	Feb	-22.6	19
1896	Mar	-29.6	14
1896	Apr	-13.9	8
1896	May	-6.6	27
1896	Jun	5.1	42
1896	Jul	9.2	30
1896	Aug	10.1	31
1896	Sep	2.3	31
1896	Oct	-12.4	37
1896	Nov	-17.8	17
1896	Dec	-31.2	13
1897	Jan	-26.4	21
1897	Feb	-39.9	11
1897	Mar	-23.9	22
1897	Apr	-16.1	12
1897	May	-7.9	25
1897	Jun	6.6	33
1897	Jul	12.7	21
1897	Aug	9.8	34
1897	Sep	2.1	23
1897	Oct	-16.4	20
1897	Nov	-20.7	18
1897	Dec	-32.3	19
1898	Jan	-32.3	8
1898	Feb	-38	17
1898	Mar	-24.9	12
1898	Apr	-16	9
1898	May	-2.7	17
1898	Jun	6.8	34
1898	Jul	10.1	43
1898	Aug	7.8	44
1898	Sep	0	25
1898	Oct	-14	30
1898	Nov	-23.2	34
1898	Dec	-28.8	21
1899	Jan	-38.8	6
1899	Feb	-37.9	9
1899	Mar	-22.1	19
1899	Apr	-17.4	10
1899	May	-3.4	10
1899	Jun	8.5	29
1899	Jul	12.9	37
1899	Aug	9.2	37
1899	Sep	-2.9	8
1899	Oct	-15.7	28
1899	Nov	-29.8	8
1899	Dec	-29.9	32
1900	Jan	-24.8	14
1900	Feb	-33.6	25
1900	Mar	-33	8
1900	Apr	-21.4	4
1900	May	-2.5	17
1900	Jun	8.6	30
1900	Jul	10.6	25
1900	Aug	8	38
1900	Sep	-3.1	20
1900	Oct	-16.6	42
1900	Nov	-28.7	24
1900	Dec	-32.6	17

## Sheet: NS_Location1_ukmo-hadcm3_1860-2
Year	Month	Temperature_C	Precipitation_mm
1860	Jan	-24.1	14
1860	Feb	-28.4	11
1860	Mar	-29.3	15
1860	Apr	-9.9	11
1860	May	-2.7	15
1860	Jun	10.2	35
1860	Jul	13	57
1860	Aug	7.1	35
1860	Sep	3.5	58
1860	Oct	-8.4	31
1860	Nov	-25.6	16
1860	Dec	-23.3	18
1861	Jan	-30	20
1861	Feb	-30	7
1861	Mar	-26.8	16
1861	Apr	-10.3	13
1861	May	-1.3	15
1861	Jun	7.4	17
1861	Jul	11.9	50
1861	Aug	9.3	60
1861	Sep	0.1	36
1861	Oct	-14.5	22
1861	Nov	-15.9	60
1861	Dec	-25	21
1862	Jan	-27.5	22
1862	Feb	-29.8	17
1862	Mar	-24.8	8
1862	Apr	-12.2	10
1862	May	-1.6	14
1862	Jun	8.3	55
1862	Jul	11.3	85
1862	Aug	7.2	48
1862	Sep	-5.5	38
1862	Oct	-17.5	22
1862	Nov	-25.8	27
1862	Dec	-30.6	11
1863	Jan	-31.5	39
1863	Feb	-23.5	18
1863	Mar	-31	6
1863	Apr	-13.7	7
1863	May	-2.6	17
1863	Jun	9.8	38
1863	Jul	12.9	43
1863	Aug	10.3	74
1863	Sep	0.2	39
1863	Oct	-12.5	23
1863	Nov	-18.5	28
1863	Dec	-30	26
1864	Jan	-33.3	6
1864	Feb	-25.6	10
1864	Mar	-22.2	12
1864	Apr	-11.8	19
1864	May	-0.8	17
1864	Jun	8.7	40
1864	Jul	14.3	31
1864	Aug	8.9	38
1864	Sep	1.2	34
1864	Oct	-9.4	20
1864	Nov	-23.7	17
1864	Dec	-25.5	43
1865	Jan	-25.3	16
1865	Feb	-25.3	6
1865	Mar	-22.3	12
1865	Apr	-11.7	12
1865	May	-3.3	17
1865	Jun	7.9	38
1865	Jul	8.4	99
1865	Aug	6	54
1865	Sep	2.3	39
1865	Oct	-12.3	36
1865	Nov	-26.2	29
1865	Dec	-22.4	45
1866	Jan	-24.8	17
1866	Feb	-29.5	14
1866	Mar	-20.8	27
1866	Apr	-10.1	12
1866	May	0.4	13
1866	Jun	9.9	37
1866	Jul	12.8	65
1866	Aug	8.2	70
1866	Sep	2.6	44
1866	Oct	-13.8	24
1866	Nov	-15.6	24
1866	Dec	-30.6	10
1867	Jan	-28.7	26
1867	Feb	-21.7	21
1867	Mar	-26	7
1867	Apr	-16.1	7
1867	May	-4.7	7
1867	Jun	2.4	23
1867	Jul	16.6	37
1867	Aug	8.2	22
1867	Sep	0.4	34
1867	Oct	-13.3	21
1867	Nov	-26.5	17
1867	Dec	-28.6	28
1868	Jan	-25.6	48
1868	Feb	-29.8	33
1868	Mar	-26.7	9
1868	Apr	-14.5	10
1868	May	-0.7	15
1868	Jun	10.1	42
1868	Jul	10.8	58
1868	Aug	9.7	82
1868	Sep	2	33
1868	Oct	-8.9	15
1868	Nov	-16	33
1868	Dec	-31.4	12
1869	Jan	-33.3	37
1869	Feb	-20.5	8
1869	Mar	-21.3	4
1869	Apr	-8.7	5
1869	May	-2	17
1869	Jun	5.8	31
1869	Jul	13.6	36
1869	Aug	9.7	100
1869	Sep	0.5	23
1869	Oct	-11.7	30
1869	Nov	-25.7	16
1869	Dec	-26.8	26
1870	Jan	-31.1	10
1870	Feb	-34	9
1870	Mar	-32.4	22
1870	Apr	-15.4	19
1870	May	-2.9	20
1870	Jun	7.5	30
1870	Jul	10.7	63
1870	Aug	8	50
1870	Sep	0.1	45
1870	Oct	-19.8	20
1870	Nov	-24.5	20
1870	Dec	-26.7	15
1871	Jan	-29.7	8
1871	Feb	-25.1	28
1871	Mar	-25.7	9
1871	Apr	-17	9
1871	May	1.5	28
1871	Jun	11.6	49
1871	Jul	9.5	88
1871	Aug	9.3	51
1871	Sep	1	51
1871	Oct	-11.5	17
1871	Nov	-15.5	30
1871	Dec	-29.3	15
1872	Jan	-27.4	9
1872	Feb	-32.1	17
1872	Mar	-26.8	11
1872	Apr	-16.6	10
1872	May	-5.8	12
1872	Jun	8.1	28
1872	Jul	8.4	71
1872	Aug	7.9	78
1872	Sep	-1.1	56
1872	Oct	-15.3	17
1872	Nov	-23.4	23
1872	Dec	-29.9	45
1873	Jan	-25.7	16
1873	Feb	-27.5	37
1873	Mar	-22.8	8
1873	Apr	-9.8	18
1873	May	-3.3	14
1873	Jun	6.7	20
1873	Jul	15.5	46
1873	Aug	10	69
1873	Sep	1.3	21
1873	Oct	-10.6	12
1873	Nov	-21.8	15
1873	Dec	-31.9	15
1874	Jan	-24.6	13
1874	Feb	-29.6	11
1874	Mar	-25.1	20
1874	Apr	-16.6	7
1874	May	-3.8	18
1874	Jun	7.9	37
1874	Jul	16.4	29
1874	Aug	9.8	53
1874	Sep	1	27
1874	Oct	-7.8	27
1874	Nov	-17.4	19
1874	Dec	-30.3	15
1875	Jan	-21.2	24
1875	Feb	-19.9	9
1875	Mar	-24.3	18
1875	Apr	-18.8	15
1875	May	-3.4	13
1875	Jun	6.4	40
1875	Jul	10.8	39
1875	Aug	8.7	62
1875	Sep	1.8	64
1875	Oct	-16.7	25
1875	Nov	-25.4	13
1875	Dec	-26.4	16
1876	Jan	-27.5	21
1876	Feb	-27.6	5
1876	Mar	-28.9	15
1876	Apr	-18.3	13
1876	May	-4.4	15
1876	Jun	9.5	27
1876	Jul	12.1	50
1876	Aug	7.9	47
1876	Sep	-1.6	43
1876	Oct	-15.3	33
1876	Nov	-27.9	7
1876	Dec	-33.1	22
1877	Jan	-27.7	14
1877	Feb	-23.1	14
1877	Mar	-29.5	3
1877	Apr	-15	14
1877	May	-4.4	14
1877	Jun	4.7	19
1877	Jul	9.9	41
1877	Aug	8.3	37
1877	Sep	-3.1	19
1877	Oct	-17.2	40
1877	Nov	-29.1	23
1877	Dec	-26.5	38
1878	Jan	-30.4	11
1878	Feb	-32.6	9
1878	Mar	-29.7	10
1878	Apr	-14.3	13
1878	May	-3.2	28
1878	Jun	7.1	24
1878	Jul	10	76
1878	Aug	8.7	85
1878	Sep	0.1	38
1878	Oct	-13.5	41
1878	Nov	-18.6	21
1878	Dec	-27	25
1879	Jan	-33.8	12
1879	Feb	-23.8	13
1879	Mar	-30.1	9
1879	Apr	-13.1	8
1879	May	-1.7	22
1879	Jun	10.8	35
1879	Jul	13.1	59
1879	Aug	7.7	58
1879	Sep	1.9	58
1879	Oct	-10.9	31
1879	Nov	-21.9	7
1879	Dec	-24.2	18
1880	Jan	-27.1	14
1880	Feb	-29.6	25
1880	Mar	-29.6	9
1880	Apr	-14	4
1880	May	-3.5	18
1880	Jun	5.8	29
1880	Jul	11.3	67
1880	Aug	8.1	56
1880	Sep	-2.5	20
1880	Oct	-11.9	46
1880	Nov	-16.8	24
1880	Dec	-22.5	31
1881	Jan	-22.9	18
1881	Feb	-30.8	12
1881	Mar	-23.7	7
1881	Apr	-10.6	12
1881	May	-3.2	9
1881	Jun	5.5	40
1881	Jul	10.2	37
1881	Aug	9	58
1881	Sep	-1.9	24
1881	Oct	-18.9	13
1881	Nov	-19	36
1881	Dec	-30.4	24
1882	Jan	-32.1	7
1882	Feb	-34.8	12
1882	Mar	-27.9	9
1882	Apr	-19.7	5
1882	May	-2.8	16
1882	Jun	8	41
1882	Jul	12.5	55
1882	Aug	8.1	73
1882	Sep	-1.3	59
1882	Oct	-14.3	16
1882	Nov	-22.3	14
1882	Dec	-32.1	16
1883	Jan	-28.3	20
1883	Feb	-31.6	13
1883	Mar	-30.2	16
1883	Apr	-11.2	10
1883	May	-1.5	33
1883	Jun	9.1	38
1883	Jul	13.2	39
1883	Aug	8.6	83
1883	Sep	1.5	70
1883	Oct	-9	27
1883	Nov	-16.8	14
1883	Dec	-31.6	20
1884	Jan	-31.6	29
1884	Feb	-34.7	30
1884	Mar	-22.5	10
1884	Apr	-12.5	7
1884	May	-0.1	18
1884	Jun	9.7	38
1884	Jul	11.4	54
1884	Aug	6.6	70
1884	Sep	0.7	51
1884	Oct	-16	13
1884	Nov	-24.9	31
1884	Dec	-29.7	16
1885	Jan	-25.2	25
1885	Feb	-28.9	22
1885	Mar	-25.8	7
1885	Apr	-19.6	7
1885	May	0.5	17
1885	Jun	10.7	33
1885	Jul	16.2	40
1885	Aug	7.7	51
1885	Sep	-0.2	66
1885	Oct	-8.8	32
1885	Nov	-22.5	23
1885	Dec	-29.7	19
1886	Jan	-24.2	24
1886	Feb	-32.1	21
1886	Mar	-26.2	17
1886	Apr	-16.6	8
1886	May	-1.3	10
1886	Jun	9.7	40
1886	Jul	12.9	45
1886	Aug	9.1	97
1886	Sep	-0.9	21
1886	Oct	-13.7	20
1886	Nov	-27.2	30
1886	Dec	-32.1	19
1887	Jan	-31	14
1887	Feb	-26.6	24
1887	Mar	-18.6	6
1887	Apr	-10.8	7
1887	May	-1.8	13
1887	Jun	9.7	42
1887	Jul	8.5	39
1887	Aug	6.5	100
1887	Sep	-0.9	45
1887	Oct	-14.4	32
1887	Nov	-26.3	23
1887	Dec	-32.9	16
1888	Jan	-31.6	7
1888	Feb	-23.9	20
1888	Mar	-28	5
1888	Apr	-18.7	9
1888	May	-0.8	10
1888	Jun	8.9	39
1888	Jul	11.8	30
1888	Aug	9.4	92
1888	Sep	1.9	41
1888	Oct	-8.6	26
1888	Nov	-17.8	29
1888	Dec	-23.9	32
1889	Jan	-25.1	22
1889	Feb	-24	18
1889	Mar	-18.6	17
1889	Apr	-15.6	4
1889	May	-2.8	20
1889	Jun	7.6	34
1889	Jul	8.1	65
1889	Aug	6.1	86
1889	Sep	2.7	63
1889	Oct	-15.5	10
1889	Nov	-26.9	19
1889	Dec	-21.9	29
1890	Jan	-27.8	10
1890	Feb	-24.4	10
1890	Mar	-31.1	5
1890	Apr	-13.2	25
1890	May	-2	17
1890	Jun	8.9	36
1890	Jul	12.4	93
1890	Aug	8.4	63
1890	Sep	-1.2	31
1890	Oct	-9.7	23
1890	Nov	-26.3	19
1890	Dec	-23.5	18
1891	Jan	-25.2	32
1891	Feb	-22.5	16
1891	Mar	-17.9	27
1891	Apr	-12.7	9
1891	May	-3	10
1891	Jun	6.2	26
1891	Jul	11.5	50
1891	Aug	10.5	51
1891	Sep	2.9	35
1891	Oct	-10.8	23
1891	Nov	-26.5	10
1891	Dec	-30.5	50
1892	Jan	-30.9	7
1892	Feb	-32.6	7
1892	Mar	-18.9	22
1892	Apr	-18.1	12
1892	May	-3.1	13
1892	Jun	7.5	36
1892	Jul	8.8	44
1892	Aug	7.7	44
1892	Sep	-1.2	49
1892	Oct	-17.2	20
1892	Nov	-26.8	23
1892	Dec	-26.8	29
1893	Jan	-27.5	19
1893	Feb	-25.2	13
1893	Mar	-20	11
1893	Apr	-19.4	5
1893	May	-3.8	19
1893	Jun	7.4	27
1893	Jul	11.7	53
1893	Aug	10.4	53
1893	Sep	1.3	76
1893	Oct	-11.9	15
1893	Nov	-19	18
1893	Dec	-31.9	21
1894	Jan	-33.1	10
1894	Feb	-27.1	13
1894	Mar	-25.5	10
1894	Apr	-16.1	11
1894	May	-2.7	15
1894	Jun	9.4	13
1894	Jul	14.1	54
1894	Aug	10.6	42
1894	Sep	-0.3	49
1894	Oct	-16.5	26
1894	Nov	-25.9	18
1894	Dec	-31.6	7
1895	Jan	-23.2	24
1895	Feb	-23.7	10
1895	Mar	-30.1	12
1895	Apr	-21.7	5
1895	May	-3.8	15
1895	Jun	10.3	40
1895	Jul	10.2	63
1895	Aug	9.9	75
1895	Sep	1.7	58
1895	Oct	-17.3	21
1895	Nov	-25.2	32
1895	Dec	-32	16
1896	Jan	-26.8	25
1896	Feb	-22.9	23
1896	Mar	-29.9	12
1896	Apr	-11.9	19
1896	May	-2.4	21
1896	Jun	9.1	40
1896	Jul	10.7	68
1896	Aug	8	38
1896	Sep	0.2	45
1896	Oct	-13.7	30
1896	Nov	-25.9	36
1896	Dec	-27	38
1897	Jan	-23.7	21
1897	Feb	-29.4	10
1897	Mar	-22.2	9
1897	Apr	-12	8
1897	May	-1.7	19
1897	Jun	6.8	44
1897	Jul	9.7	62
1897	Aug	6	57
1897	Sep	-0.4	37
1897	Oct	-13	29
1897	Nov	-28.7	20
1897	Dec	-33.3	17
1898	Jan	-28.8	42
1898	Feb	-27.5	22
1898	Mar	-27.6	8
1898	Apr	-9.9	6
1898	May	-5.1	15
1898	Jun	7.5	42
1898	Jul	16.4	42
1898	Aug	11.4	37
1898	Sep	2.7	47
1898	Oct	-16.1	16
1898	Nov	-20.9	17
1898	Dec	-22.8	32
1899	Jan	-26.3	15
1899	Feb	-29.6	12
1899	Mar	-25.7	8
1899	Apr	-13	6
1899	May	-1.9	23
1899	Jun	10.1	41
1899	Jul	9.7	69
1899	Aug	9	46
1899	Sep	2.8	89
1899	Oct	-9.4	24
1899	Nov	-23.5	41
1899	Dec	-29.9	42
1900	Jan	-21.7	23
1900	Feb	-24.4	19
1900	Mar	-26.7	5
1900	Apr	-15.2	13
1900	May	-2.4	15
1900	Jun	10.2	32
1900	Jul	15.7	28
1900	Aug	7.3	64
1900	Sep	-1	25
1900	Oct	-7.7	36
1900	Nov	-18.3	19
1900	Dec	-19	25

## Sheet: NS_Location1_mpi-echam5_1860-20
Year	Month	Temperature_C	Precipitation_mm
1860	Jan	-29	11
1860	Feb	-23.9	18
1860	Mar	-24.3	18
1860	Apr	-15.2	10
1860	May	-1.6	15
1860	Jun	9.9	18
1860	Jul	11.2	55
1860	Aug	9.1	77
1860	Sep	0.4	61
1860	Oct	-12.8	39
1860	Nov	-20.1	16
1860	Dec	-27.7	26
1861	Jan	-26	33
1861	Feb	-19	30
1861	Mar	-17	26
1861	Apr	-14.1	11
1861	May	-2.8	23
1861	Jun	5.7	62
1861	Jul	9.9	38
1861	Aug	8.8	73
1861	Sep	-1.3	43
1861	Oct	-9.9	29
1861	Nov	-21.3	20
1861	Dec	-31.5	14
1862	Jan	-20.2	32
1862	Feb	-25.1	14
1862	Mar	-28.7	12
1862	Apr	-17.2	7
1862	May	-1.1	19
1862	Jun	9	53
1862	Jul	9.7	55
1862	Aug	6.2	59
1862	Sep	-2.9	52
1862	Oct	-12.4	24
1862	Nov	-17.2	51
1862	Dec	-28.5	18
1863	Jan	-20.4	24
1863	Feb	-26.4	31
1863	Mar	-30.2	11
1863	Apr	-14.4	5
1863	May	-3	31
1863	Jun	4.9	88
1863	Jul	7.5	65
1863	Aug	7.2	59
1863	Sep	-1.4	32
1863	Oct	-14.5	30
1863	Nov	-26.6	10
1863	Dec	-27.8	40
1864	Jan	-26.8	14
1864	Feb	-31.2	12
1864	Mar	-29.8	7
1864	Apr	-14.3	8
1864	May	-0.3	34
1864	Jun	7	53
1864	Jul	9.1	79
1864	Aug	11.1	66
1864	Sep	0.5	31
1864	Oct	-11.8	22
1864	Nov	-22.1	15
1864	Dec	-30.2	18
1865	Jan	-28.7	17
1865	Feb	-19.4	31
1865	Mar	-17.1	10
1865	Apr	-13.4	14
1865	May	-2.5	28
1865	Jun	7.3	53
1865	Jul	13	62
1865	Aug	9.2	25
1865	Sep	0.5	22
1865	Oct	-12.1	36
1865	Nov	-13.8	53
1865	Dec	-18.9	29
1866	Jan	-18.8	33
1866	Feb	-20.1	42
1866	Mar	-24	4
1866	Apr	-13.4	15
1866	May	0.4	20
1866	Jun	6.4	49
1866	Jul	9.2	73
1866	Aug	7.1	43
1866	Sep	0.4	43
1866	Oct	-14.2	35
1866	Nov	-24.3	19
1866	Dec	-26.9	15
1867	Jan	-22.9	26
1867	Feb	-27.5	21
1867	Mar	-29.2	6
1867	Apr	-15.3	12
1867	May	-3.3	28
1867	Jun	7.2	48
1867	Jul	13.5	40
1867	Aug	12.3	48
1867	Sep	2.2	85
1867	Oct	-6.1	66
1867	Nov	-15.9	43
1867	Dec	-24.5	6
1868	Jan	-25	21
1868	Feb	-22	27
1868	Mar	-19.8	14
1868	Apr	-10.8	20
1868	May	0.1	19
1868	Jun	9.1	24
1868	Jul	12.5	37
1868	Aug	9.7	48
1868	Sep	2.6	58
1868	Oct	-13.7	21
1868	Nov	-24.1	16
1868	Dec	-18.6	55
1869	Jan	-27.9	10
1869	Feb	-21.2	47
1869	Mar	-26.9	14
1869	Apr	-12.2	10
1869	May	-2.6	22
1869	Jun	6.1	48
1869	Jul	11.5	78
1869	Aug	7.7	38
1869	Sep	1.9	46
1869	Oct	-12.8	45
1869	Nov	-24.4	8
1869	Dec	-26.3	18
1870	Jan	-31.9	6
1870	Feb	-25.5	11
1870	Mar	-20.4	9
1870	Apr	-11.7	13
1870	May	1.3	19
1870	Jun	11.2	39
1870	Jul	10.5	45
1870	Aug	7.5	53
1870	Sep	-1.1	67
1870	Oct	-10.4	39
1870	Nov	-15.6	31
1870	Dec	-22.8	28
1871	Jan	-29.6	11
1871	Feb	-26.7	4
1871	Mar	-28.8	11
1871	Apr	-15.3	15
1871	May	-5	8
1871	Jun	6.4	61
1871	Jul	10.6	60
1871	Aug	6.9	73
1871	Sep	1.8	59
1871	Oct	-10.2	44
1871	Nov	-23.4	16
1871	Dec	-18.7	30
1872	Jan	-28.5	10
1872	Feb	-26.6	22
1872	Mar	-25.2	9
1872	Apr	-13	8
1872	May	0.4	18
1872	Jun	6.9	45
1872	Jul	9.4	62
1872	Aug	7.3	56
1872	Sep	2.8	55
1872	Oct	-9.1	39
1872	Nov	-15.1	47
1872	Dec	-26.6	38
1873	Jan	-23.4	21
1873	Feb	-33.3	7
1873	Mar	-24.9	16
1873	Apr	-13.6	9
1873	May	-1.8	23
1873	Jun	6.5	32
1873	Jul	12.2	60
1873	Aug	7.9	97
1873	Sep	-0.8	68
1873	Oct	-17.5	18
1873	Nov	-21.6	33
1873	Dec	-27	33
1874	Jan	-31.1	7
1874	Feb	-27.9	16
1874	Mar	-30.1	10
1874	Apr	-15	4
1874	May	-4.7	24
1874	Jun	6.7	40
1874	Jul	9.7	77
1874	Aug	7.5	73
1874	Sep	1	47
1874	Oct	-14	18
1874	Nov	-16.5	25
1874	Dec	-27.8	23
1875	Jan	-27.7	18
1875	Feb	-24.8	12
1875	Mar	-31.4	13
1875	Apr	-14.1	14
1875	May	-2.8	14
1875	Jun	7.5	57
1875	Jul	9.9	56
1875	Aug	7.1	54
1875	Sep	2.6	93
1875	Oct	-11.7	36
1875	Nov	-24.1	19
1875	Dec	-25.3	34
1876	Jan	-20.4	32
1876	Feb	-23.5	26
1876	Mar	-17.9	15
1876	Apr	-13	14
1876	May	-2.6	25
1876	Jun	7.2	45
1876	Jul	15.1	19
1876	Aug	8.7	27
1876	Sep	3.8	59
1876	Oct	-14.7	39
1876	Nov	-16.8	28
1876	Dec	-19.8	19
1877	Jan	-27	16
1877	Feb	-21.8	8
1877	Mar	-18.5	10
1877	Apr	-13.2	20
1877	May	-4.8	12
1877	Jun	7.8	40
1877	Jul	12.3	33
1877	Aug	11.2	36
1877	Sep	0	57
1877	Oct	-10.4	38
1877	Nov	-14	26
1877	Dec	-29.7	11
1878	Jan	-20.4	22
1878	Feb	-31.1	15
1878	Mar	-21.9	25
1878	Apr	-14.6	8
1878	May	-2.2	21
1878	Jun	13.6	54
1878	Jul	13.3	65
1878	Aug	10.4	36
1878	Sep	-2.5	56
1878	Oct	-10.8	38
1878	Nov	-26.1	9
1878	Dec	-30.2	11
1879	Jan	-33.2	5
1879	Feb	-29.9	4
1879	Mar	-31.1	12
1879	Apr	-15.2	20
1879	May	-6	9
1879	Jun	5.4	45
1879	Jul	9.7	55
1879	Aug	7	63
1879	Sep	1.4	39
1879	Oct	-9	41
1879	Nov	-18.1	12
1879	Dec	-18.9	34
1880	Jan	-20.3	24
1880	Feb	-25.5	31
1880	Mar	-21.8	22
1880	Apr	-10.6	8
1880	May	-2.6	12
1880	Jun	9.1	48
1880	Jul	11.2	52
1880	Aug	7.9	108
1880	Sep	-2.9	41
1880	Oct	-13.1	59
1880	Nov	-26.4	12
1880	Dec	-23.8	27
1881	Jan	-26.9	10
1881	Feb	-21.7	10
1881	Mar	-16.6	11
1881	Apr	-17.7	8
1881	May	-3.4	14
1881	Jun	6.6	44
1881	Jul	16.4	36
1881	Aug	13	26
1881	Sep	3.2	76
1881	Oct	-14.6	25
1881	Nov	-13.6	50
1881	Dec	-20.8	24
1882	Jan	-22.4	10
1882	Feb	-19.5	38
1882	Mar	-22.8	20
1882	Apr	-18.3	5
1882	May	2	18
1882	Jun	11.6	23
1882	Jul	12	59
1882	Aug	9.8	41
1882	Sep	-1.8	76
1882	Oct	-16.5	13
1882	Nov	-21.9	30
1882	Dec	-30.4	19
1883	Jan	-24.8	20
1883	Feb	-31.1	17
1883	Mar	-27.5	12
1883	Apr	-11.1	20
1883	May	-4.1	30
1883	Jun	5.2	62
1883	Jul	9	90
1883	Aug	7.1	89
1883	Sep	0.4	40
1883	Oct	-13.7	27
1883	Nov	-24.6	14
1883	Dec	-26.5	43
1884	Jan	-20.9	19
1884	Feb	-28.2	9
1884	Mar	-26	29
1884	Apr	-19.7	3
1884	May	-6.4	13
1884	Jun	9.1	26
1884	Jul	11	47
1884	Aug	9.2	56
1884	Sep	1.7	46
1884	Oct	-10.2	23
1884	Nov	-20.4	19
1884	Dec	-27.4	38
1885	Jan	-22.1	15
1885	Feb	-34	4
1885	Mar	-23.8	14
1885	Apr	-12.9	12
1885	May	-2.6	16
1885	Jun	8.4	25
1885	Jul	11.1	40
1885	Aug	8.6	20
1885	Sep	2.3	60
1885	Oct	-11.8	18
1885	Nov	-16.2	22
1885	Dec	-22.5	48
1886	Jan	-32.1	11
1886	Feb	-30.9	19
1886	Mar	-18.7	10
1886	Apr	-15.6	5
1886	May	-0.7	24
1886	Jun	6.6	46
1886	Jul	12.3	39
1886	Aug	5.9	62
1886	Sep	1.2	46
1886	Oct	-12.1	28
1886	Nov	-25	9
1886	Dec	-30.2	37
1887	Jan	-26.4	6
1887	Feb	-23.1	14
1887	Mar	-23.8	4
1887	Apr	-14.2	7
1887	May	-6.1	11
1887	Jun	7.4	33
1887	Jul	10.1	74
1887	Aug	10.6	52
1887	Sep	2.4	46
1887	Oct	-7.8	44
1887	Nov	-17.9	22
1887	Dec	-26.7	19
1888	Jan	-28.3	9
1888	Feb	-22	30
1888	Mar	-26.7	10
1888	Apr	-17.6	4
1888	May	-1.8	23
1888	Jun	8.7	39
1888	Jul	11.3	59
1888	Aug	10.1	25
1888	Sep	2.2	61
1888	Oct	-10.9	29
1888	Nov	-16	17
1888	Dec	-22.4	16
1889	Jan	-23.4	25
1889	Feb	-21.2	33
1889	Mar	-25.7	20
1889	Apr	-13.9	6
1889	May	-0.5	28
1889	Jun	8.6	25
1889	Jul	9.6	64
1889	Aug	6.5	53
1889	Sep	-1.6	53
1889	Oct	-16.5	20
1889	Nov	-16.3	38
1889	Dec	-22.9	11
1890	Jan	-29.9	5
1890	Feb	-26.9	12
1890	Mar	-22.8	14
1890	Apr	-14.5	9
1890	May	0.6	14
1890	Jun	7.3	33
1890	Jul	8	118
1890	Aug	5.7	59
1890	Sep	3.8	96
1890	Oct	-14.9	16
1890	Nov	-20.8	17
1890	Dec	-20.7	34
1891	Jan	-18.9	26
1891	Feb	-29.9	10
1891	Mar	-21.2	9
1891	Apr	-18.6	6
1891	May	-1.6	13
1891	Jun	8.3	35
1891	Jul	14.6	28
1891	Aug	10	68
1891	Sep	-1.6	43
1891	Oct	-15.6	16
1891	Nov	-27.8	8
1891	Dec	-23.1	37
1892	Jan	-28.5	26
1892	Feb	-24.1	27
1892	Mar	-27.2	20
1892	Apr	-12.7	7
1892	May	-2.1	40
1892	Jun	7.7	42
1892	Jul	15.1	30
1892	Aug	8	50
1892	Sep	1.6	61
1892	Oct	-11.8	28
1892	Nov	-16.8	39
1892	Dec	-26.4	32
1893	Jan	-25	20
1893	Feb	-33.3	18
1893	Mar	-28.9	14
1893	Apr	-12.2	10
1893	May	-3	16
1893	Jun	10.8	25
1893	Jul	11.9	68
1893	Aug	9.7	74
1893	Sep	2.3	52
1893	Oct	-10.8	37
1893	Nov	-16.1	19
1893	Dec	-26.3	33
1894	Jan	-24.6	14
1894	Feb	-23.1	20
1894	Mar	-25.5	17
1894	Apr	-15.6	9
1894	May	-1.4	19
1894	Jun	8.7	44
1894	Jul	9.1	57
1894	Aug	5.6	41
1894	Sep	0.1	30
1894	Oct	-10.9	41
1894	Nov	-16.4	23
1894	Dec	-32.3	12
1895	Jan	-23.4	23
1895	Feb	-21.6	19
1895	Mar	-23.8	19
1895	Apr	-16	9
1895	May	-2.1	12
1895	Jun	9	35
1895	Jul	11.6	61
1895	Aug	8.2	56
1895	Sep	-3.3	37
1895	Oct	-14.1	20
1895	Nov	-26.2	18
1895	Dec	-21.9	35
1896	Jan	-26.9	16
1896	Feb	-23.3	28
1896	Mar	-21.7	18
1896	Apr	-12.1	8
1896	May	-2.2	13
1896	Jun	7.9	40
1896	Jul	9.9	49
1896	Aug	6.8	52
1896	Sep	0.9	57
1896	Oct	-12.2	38
1896	Nov	-17.2	17
1896	Dec	-24.5	19
1897	Jan	-27.1	9
1897	Feb	-20.5	15
1897	Mar	-18.1	26
1897	Apr	-11.9	8
1897	May	-0.7	28
1897	Jun	9.7	52
1897	Jul	10.9	42
1897	Aug	4.5	49
1897	Sep	2.8	41
1897	Oct	-14.6	17
1897	Nov	-15	29
1897	Dec	-25.9	12
1898	Jan	-27.1	10
1898	Feb	-22.7	19
1898	Mar	-29.7	9
1898	Apr	-11.2	9
1898	May	-2	22
1898	Jun	8.5	70
1898	Jul	10.4	56
1898	Aug	10.5	48
1898	Sep	1.4	38
1898	Oct	-12.5	34
1898	Nov	-17	50
1898	Dec	-30.8	34
1899	Jan	-24.9	19
1899	Feb	-21.7	10
1899	Mar	-28.4	13
1899	Apr	-12.6	9
1899	May	-0.2	9
1899	Jun	7.3	52
1899	Jul	10.5	56
1899	Aug	7.7	40
1899	Sep	1	55
1899	Oct	-10.8	31
1899	Nov	-22.2	19
1899	Dec	-23	22
1900	Jan	-21	23
1900	Feb	-21.8	25
1900	Mar	-25.7	23
1900	Apr	-12.1	16
1900	May	-2.9	22
1900	Jun	6.4	54
1900	Jul	9.2	103
1900	Aug	9.4	81
1900	Sep	-0.9	53
1900	Oct	-9.9	51
1900	Nov	-25.2	17
1900	Dec	-26.2	35

## Sheet: NS_Location1_miroc3-2-medres_18
Year	Month	Temperature_C	Precipitation_mm
1850	Jan	-26.3	38
1850	Feb	-33.6	18
1850	Mar	-25.1	15
1850	Apr	-8	14
1850	May	-2.3	27
1850	Jun	6.3	48
1850	Jul	10.8	57
1850	Aug	8.2	78
1850	Sep	-0.1	60
1850	Oct	-11.3	41
1850	Nov	-22.5	20
1850	Dec	-22.1	32
1851	Jan	-20.8	37
1851	Feb	-32.7	15
1851	Mar	-31	5
1851	Apr	-11.7	14
1851	May	-0.5	39
1851	Jun	11.5	34
1851	Jul	12.9	52
1851	Aug	9	54
1851	Sep	2.9	50
1851	Oct	-11	22
1851	Nov	-23.4	19
1851	Dec	-26.4	14
1852	Jan	-25.3	20
1852	Feb	-24.3	31
1852	Mar	-21.2	28
1852	Apr	-9.4	9
1852	May	-0.9	14
1852	Jun	12.6	29
1852	Jul	12.4	68
1852	Aug	7.4	18
1852	Sep	-0.2	34
1852	Oct	-12.3	16
1852	Nov	-21	18
1852	Dec	-28.4	10
1853	Jan	-20.8	12
1853	Feb	-19.8	16
1853	Mar	-18	11
1853	Apr	-9.6	12
1853	May	-1.5	23
1853	Jun	8.2	54
1853	Jul	9.6	63
1853	Aug	6.9	90
1853	Sep	-0.8	83
1853	Oct	-6.9	25
1853	Nov	-20.9	36
1853	Dec	-22.1	13
1854	Jan	-30.1	15
1854	Feb	-23.4	14
1854	Mar	-22.9	12
1854	Apr	-8.5	18
1854	May	0.9	22
1854	Jun	11.2	43
1854	Jul	11.2	135
1854	Aug	7.4	55
1854	Sep	0.7	31
1854	Oct	-8.3	26
1854	Nov	-21.3	20
1854	Dec	-21.8	51
1855	Jan	-24.6	22
1855	Feb	-24.1	19
1855	Mar	-16.2	8
1855	Apr	-13	14
1855	May	-0.6	24
1855	Jun	9.4	36
1855	Jul	11.6	75
1855	Aug	9.6	55
1855	Sep	1.4	48
1855	Oct	-10.2	38
1855	Nov	-23.5	12
1855	Dec	-30.6	20
1856	Jan	-26.4	16
1856	Feb	-29.5	12
1856	Mar	-28.9	3
1856	Apr	-8.2	9
1856	May	-1.2	27
1856	Jun	6.9	27
1856	Jul	12	64
1856	Aug	6.2	84
1856	Sep	0.1	32
1856	Oct	-16.1	19
1856	Nov	-26.1	19
1856	Dec	-29.4	33
1857	Jan	-28.9	11
1857	Feb	-21.2	29
1857	Mar	-22.4	9
1857	Apr	-10.8	7
1857	May	-0.4	16
1857	Jun	9.1	20
1857	Jul	12.5	47
1857	Aug	8.9	70
1857	Sep	2.8	67
1857	Oct	-10.1	35
1857	Nov	-19.9	31
1857	Dec	-23	16
1858	Jan	-22.2	14
1858	Feb	-23	5
1858	Mar	-25.6	9
1858	Apr	-13.6	21
1858	May	-0.5	13
1858	Jun	11	44
1858	Jul	14	42
1858	Aug	13	45
1858	Sep	2.8	53
1858	Oct	-9.4	33
1858	Nov	-18.7	13
1858	Dec	-23.8	21
1859	Jan	-32.4	11
1859	Feb	-25.4	21
1859	Mar	-24.3	12
1859	Apr	-13.8	13
1859	May	-1.7	15
1859	Jun	6.9	49
1859	Jul	10.4	69
1859	Aug	6	71
1859	Sep	-0.3	39
1859	Oct	-11.1	41
1859	Nov	-26.5	23
1859	Dec	-30.7	17
1860	Jan	-26.3	11
1860	Feb	-34.9	9
1860	Mar	-18.6	27
1860	Apr	-17.8	5
1860	May	-3.6	17
1860	Jun	5.7	34
1860	Jul	14.3	46
1860	Aug	7.1	70
1860	Sep	2.3	60
1860	Oct	-13.9	33
1860	Nov	-21.4	27
1860	Dec	-30.5	29
1861	Jan	-24.1	9
1861	Feb	-26.2	17
1861	Mar	-19.4	28
1861	Apr	-12.5	7
1861	May	-0.8	14
1861	Jun	11.6	31
1861	Jul	11.7	62
1861	Aug	8.7	54
1861	Sep	-0.2	45
1861	Oct	-13.2	55
1861	Nov	-26	10
1861	Dec	-32.4	13
1862	Jan	-26.2	29
1862	Feb	-21	11
1862	Mar	-24.4	15
1862	Apr	-14	8
1862	May	-3.5	34
1862	Jun	3.9	22
1862	Jul	9.5	50
1862	Aug	4.4	51
1862	Sep	-0.9	70
1862	Oct	-13.2	38
1862	Nov	-25.6	18
1862	Dec	-27.7	39
1863	Jan	-25	11
1863	Feb	-20.8	14
1863	Mar	-23.6	7
1863	Apr	-10.2	23
1863	May	-2	13
1863	Jun	7.7	46
1863	Jul	10.7	61
1863	Aug	10.7	24
1863	Sep	-0.8	69
1863	Oct	-13	18
1863	Nov	-18.2	27
1863	Dec	-32.4	16
1864	Jan	-25	10
1864	Feb	-29.9	11
1864	Mar	-25.6	13
1864	Apr	-17.4	5
1864	May	-3.4	16
1864	Jun	9.2	21
1864	Jul	8.6	110
1864	Aug	6.9	44
1864	Sep	0.2	43
1864	Oct	-11.1	24
1864	Nov	-25.4	17
1864	Dec	-25.9	11
1865	Jan	-28.1	12
1865	Feb	-25.9	9
1865	Mar	-29.8	7
1865	Apr	-15.1	6
1865	May	-2.4	20
1865	Jun	11.5	35
1865	Jul	9.9	38
1865	Aug	7	68
1865	Sep	-0.3	53
1865	Oct	-14.1	30
1865	Nov	-24.8	23
1865	Dec	-25.6	28
1866	Jan	-29.6	22
1866	Feb	-30.3	14
1866	Mar	-25.8	8
1866	Apr	-13.7	9
1866	May	-4	8
1866	Jun	6.6	46
1866	Jul	11.9	62
1866	Aug	9.3	52
1866	Sep	0.6	63
1866	Oct	-10.8	18
1866	Nov	-25.4	13
1866	Dec	-33.1	11
1867	Jan	-33.4	8
1867	Feb	-29	19
1867	Mar	-26	6
1867	Apr	-8.6	11
1867	May	0.9	16
1867	Jun	10	53
1867	Jul	10.8	74
1867	Aug	6.9	43
1867	Sep	2.5	46
1867	Oct	-12.4	44
1867	Nov	-17.6	53
1867	Dec	-22	28
1868	Jan	-24	9
1868	Feb	-25.8	17
1868	Mar	-28.3	4
1868	Apr	-14.7	12
1868	May	-2.2	18
1868	Jun	9.6	30
1868	Jul	11.1	59
1868	Aug	5.8	65
1868	Sep	1.5	48
1868	Oct	-13.6	19
1868	Nov	-19.9	15
1868	Dec	-22.7	24
1869	Jan	-22.9	26
1869	Feb	-29.4	15
1869	Mar	-18.9	14
1869	Apr	-11.5	9
1869	May	-0.7	10
1869	Jun	10.1	22
1869	Jul	10.2	67
1869	Aug	9.4	65
1869	Sep	-0.7	28
1869	Oct	-10.9	42
1869	Nov	-17.3	26
1869	Dec	-24.2	21
1870	Jan	-32	7
1870	Feb	-27.3	25
1870	Mar	-20.5	20
1870	Apr	-14.7	11
1870	May	0.1	24
1870	Jun	8.6	46
1870	Jul	9.4	68
1870	Aug	10.3	29
1870	Sep	1.5	35
1870	Oct	-12	32
1870	Nov	-25.6	19
1870	Dec	-31.8	13
1871	Jan	-32.1	14
1871	Feb	-31.4	18
1871	Mar	-29.7	6
1871	Apr	-14.5	19
1871	May	-2.4	24
1871	Jun	5.1	54
1871	Jul	10.5	72
1871	Aug	8.1	48
1871	Sep	1.2	40
1871	Oct	-12.1	36
1871	Nov	-18.6	23
1871	Dec	-27.7	30
1872	Jan	-27.6	15
1872	Feb	-29.1	15
1872	Mar	-25.8	13
1872	Apr	-8.6	14
1872	May	0.6	12
1872	Jun	9.8	34
1872	Jul	14.4	45
1872	Aug	7.9	49
1872	Sep	-1.8	66
1872	Oct	-18.8	8
1872	Nov	-26.3	13
1872	Dec	-20.6	59
1873	Jan	-21.8	26
1873	Feb	-24.7	19
1873	Mar	-20.6	17
1873	Apr	-15	15
1873	May	-1.5	12
1873	Jun	7.2	46
1873	Jul	15.9	40
1873	Aug	6.6	68
1873	Sep	-0.7	22
1873	Oct	-10.2	39
1873	Nov	-23.2	39
1873	Dec	-24.7	28
1874	Jan	-20.7	10
1874	Feb	-21	18
1874	Mar	-17.7	13
1874	Apr	-7.8	14
1874	May	0.4	14
1874	Jun	12.3	32
1874	Jul	10	100
1874	Aug	8.3	34
1874	Sep	0.6	59
1874	Oct	-11.8	24
1874	Nov	-19.3	18
1874	Dec	-27.1	12
1875	Jan	-23.9	13
1875	Feb	-27.2	21
1875	Mar	-18.5	21
1875	Apr	-14.7	16
1875	May	-0.8	18
1875	Jun	9.3	36
1875	Jul	10.4	57
1875	Aug	5.5	84
1875	Sep	-0.1	79
1875	Oct	-11.4	43
1875	Nov	-19.8	16
1875	Dec	-24.5	25
1876	Jan	-31.5	9
1876	Feb	-31.3	20
1876	Mar	-27.8	10
1876	Apr	-11.7	17
1876	May	-2.2	30
1876	Jun	8.2	32
1876	Jul	11.2	49
1876	Aug	6.5	88
1876	Sep	-1.1	52
1876	Oct	-13.9	24
1876	Nov	-26.3	10
1876	Dec	-30	24
1877	Jan	-26.2	11
1877	Feb	-24.1	17
1877	Mar	-17.5	15
1877	Apr	-8.9	35
1877	May	-0.3	37
1877	Jun	6.4	32
1877	Jul	10.9	73
1877	Aug	5.9	86
1877	Sep	-0.6	40
1877	Oct	-13.6	14
1877	Nov	-24.9	30
1877	Dec	-30.5	18
1878	Jan	-33.4	5
1878	Feb	-30.8	19
1878	Mar	-23.4	8
1878	Apr	-14.7	5
1878	May	-1.7	10
1878	Jun	7.9	54
1878	Jul	10	93
1878	Aug	8	26
1878	Sep	2.6	46
1878	Oct	-8.6	32
1878	Nov	-20.6	20
1878	Dec	-31.8	11
1879	Jan	-30.5	12
1879	Feb	-26.5	28
1879	Mar	-18.1	20
1879	Apr	-15.3	13
1879	May	0.4	19
1879	Jun	5.6	68
1879	Jul	10.1	45
1879	Aug	9.3	73
1879	Sep	0.4	27
1879	Oct	-14.8	19
1879	Nov	-25.1	12
1879	Dec	-28.1	16
1880	Jan	-20.1	14
1880	Feb	-23.9	17
1880	Mar	-19.9	9
1880	Apr	-8.7	10
1880	May	-0.1	28
1880	Jun	12.7	39
1880	Jul	11.8	51
1880	Aug	8.5	78
1880	Sep	0.3	58
1880	Oct	-15.1	28
1880	Nov	-23.1	22
1880	Dec	-20.3	18
1881	Jan	-23.4	13
1881	Feb	-22.4	19
1881	Mar	-23.2	14
1881	Apr	-8.1	13
1881	May	-2.6	10
1881	Jun	8.9	35
1881	Jul	12.7	12
1881	Aug	8.2	67
1881	Sep	0.9	27
1881	Oct	-9.3	24
1881	Nov	-23.9	15
1881	Dec	-25.5	34
1882	Jan	-30.6	6
1882	Feb	-31.2	10
1882	Mar	-19.3	20
1882	Apr	-7.4	19
1882	May	-1.1	7
1882	Jun	10.3	15
1882	Jul	12.1	34
1882	Aug	7.4	70
1882	Sep	1.8	65
1882	Oct	-9.1	35
1882	Nov	-18.5	18
1882	Dec	-23.1	23
1883	Jan	-22	18
1883	Feb	-26.9	19
1883	Mar	-26.6	10
1883	Apr	-15.6	11
1883	May	-4.8	18
1883	Jun	6.4	24
1883	Jul	15.2	37
1883	Aug	9.4	84
1883	Sep	1.4	64
1883	Oct	-16.3	29
1883	Nov	-22	42
1883	Dec	-24.1	14
1884	Jan	-25.6	18
1884	Feb	-27.5	9
1884	Mar	-25.4	18
1884	Apr	-10.3	7
1884	May	-0.7	27
1884	Jun	8.4	43
1884	Jul	9.9	75
1884	Aug	7.3	61
1884	Sep	1.3	55
1884	Oct	-10.3	28
1884	Nov	-21.8	29
1884	Dec	-21.4	39
1885	Jan	-29.1	6
1885	Feb	-22	12
1885	Mar	-16.3	26
1885	Apr	-8.7	20
1885	May	0.2	16
1885	Jun	8.8	48
1885	Jul	13	51
1885	Aug	9.2	59
1885	Sep	2.7	64
1885	Oct	-9.5	36
1885	Nov	-20.6	22
1885	Dec	-26.9	22
1886	Jan	-25.9	14
1886	Feb	-24.1	9
1886	Mar	-17.4	40
1886	Apr	-14.1	10
1886	May	-1.4	14
1886	Jun	10.6	61
1886	Jul	10.1	66
1886	Aug	6.3	47
1886	Sep	2.7	42
1886	Oct	-12.7	16
1886	Nov	-25.8	23
1886	Dec	-24.4	24
1887	Jan	-19.9	18
1887	Feb	-20.8	36
1887	Mar	-18.8	21
1887	Apr	-12.5	20
1887	May	-0.4	7
1887	Jun	9.6	30
1887	Jul	11.5	72
1887	Aug	11.2	20
1887	Sep	0.6	48
1887	Oct	-13.6	29
1887	Nov	-25.7	30
1887	Dec	-29.7	20
1888	Jan	-20.3	12
1888	Feb	-22.9	13
1888	Mar	-22.2	15
1888	Apr	-15.3	5
1888	May	-0.5	8
1888	Jun	10.4	46
1888	Jul	11.1	128
1888	Aug	9.1	74
1888	Sep	1.8	45
1888	Oct	-14.2	26
1888	Nov	-20.1	15
1888	Dec	-20.1	46
1889	Jan	-32.8	14
1889	Feb	-27.4	11
1889	Mar	-19.4	10
1889	Apr	-13.2	16
1889	May	0.8	10
1889	Jun	8.5	31
1889	Jul	12.7	39
1889	Aug	8.9	61
1889	Sep	0.7	52
1889	Oct	-15.4	27
1889	Nov	-25.7	22
1889	Dec	-25.2	17
1890	Jan	-29.3	14
1890	Feb	-24.2	19
1890	Mar	-21.7	17
1890	Apr	-11.9	14
1890	May	1	17
1890	Jun	12.4	23
1890	Jul	11.8	58
1890	Aug	9.3	44
1890	Sep	3.1	35
1890	Oct	-11.8	8
1890	Nov	-17.6	22
1890	Dec	-22.5	10
1891	Jan	-21.3	23
1891	Feb	-23.1	17
1891	Mar	-22.5	11
1891	Apr	-16	13
1891	May	-3.6	22
1891	Jun	8.6	31
1891	Jul	15.5	52
1891	Aug	8.1	73
1891	Sep	3.4	32
1891	Oct	-12.3	34
1891	Nov	-24.6	13
1891	Dec	-25	14
1892	Jan	-30.7	13
1892	Feb	-30.8	22
1892	Mar	-22.6	13
1892	Apr	-12.3	15
1892	May	-7.4	28
1892	Jun	3.3	51
1892	Jul	11.8	54
1892	Aug	7.3	83
1892	Sep	2.7	52
1892	Oct	-16.2	15
1892	Nov	-26.3	16
1892	Dec	-29.1	11
1893	Jan	-24	16
1893	Feb	-31.7	9
1893	Mar	-28.7	6
1893	Apr	-10	12
1893	May	-1.7	11
1893	Jun	8.1	56
1893	Jul	9	83
1893	Aug	7.9	64
1893	Sep	-1.7	53
1893	Oct	-13.9	22
1893	Nov	-19.1	31
1893	Dec	-26.4	13
1894	Jan	-21.2	31
1894	Feb	-22.5	27
1894	Mar	-24.1	19
1894	Apr	-11.9	6
1894	May	-4.1	25
1894	Jun	7.6	22
1894	Jul	15.2	28
1894	Aug	9.4	23
1894	Sep	3.4	32
1894	Oct	-8.1	31
1894	Nov	-18	13
1894	Dec	-31.2	18
1895	Jan	-25.9	13
1895	Feb	-21.6	16
1895	Mar	-15.7	14
1895	Apr	-9.7	12
1895	May	1.2	12
1895	Jun	13.2	28
1895	Jul	13	64
1895	Aug	8.4	58
1895	Sep	0.5	43
1895	Oct	-9.1	27
1895	Nov	-23.4	21
1895	Dec	-26.3	30
1896	Jan	-25.6	14
1896	Feb	-31.1	14
1896	Mar	-18.5	33
1896	Apr	-9.5	18
1896	May	-4.9	18
1896	Jun	6.3	18
1896	Jul	12.5	24
1896	Aug	7.3	39
1896	Sep	0.9	44
1896	Oct	-16.7	29
1896	Nov	-27	19
1896	Dec	-21.2	18
1897	Jan	-33.5	5
1897	Feb	-28.1	14
1897	Mar	-25.6	9
1897	Apr	-12.8	11
1897	May	-3	7
1897	Jun	9.9	41
1897	Jul	9.6	51
1897	Aug	7.4	73
1897	Sep	1.7	82
1897	Oct	-18.1	11
1897	Nov	-24.9	28
1897	Dec	-29.2	20
1898	Jan	-26.8	7
1898	Feb	-33.1	22
1898	Mar	-27.6	16
1898	Apr	-13.9	10
1898	May	-0.4	13
1898	Jun	6.8	46
1898	Jul	10.7	84
1898	Aug	9.5	52
1898	Sep	2.4	68
1898	Oct	-9	30
1898	Nov	-17.1	27
1898	Dec	-29.7	15
1899	Jan	-25.8	25
1899	Feb	-23.6	19
1899	Mar	-19.1	37
1899	Apr	-16.8	11
1899	May	0.5	9
1899	Jun	7.3	47
1899	Jul	12	69
1899	Aug	7.4	86
1899	Sep	2.2	38
1899	Oct	-7.4	33
1899	Nov	-23	25
1899	Dec	-27	26
1900	Jan	-30.5	12
1900	Feb	-29	28
1900	Mar	-20.6	12
1900	Apr	-16.5	7
1900	May	-3	12
1900	Jun	9.8	37
1900	Jul	9	79
1900	Aug	7.5	91
1900	Sep	1	40
1900	Oct	-14.8	32
1900	Nov	-25.4	13
1900	Dec	-32.2	49

## Sheet: NS_Location1_gfdl-cm2-1_1861-20
Year	Month	Temperature_C	Precipitation_mm
1861	Jan	-21.1	38
1861	Feb	-22	16
1861	Mar	-22	18
1861	Apr	-8.7	9
1861	May	-0.5	23
1861	Jun	9.2	12
1861	Jul	11.1	57
1861	Aug	8.7	57
1861	Sep	0.9	26
1861	Oct	-9.6	53
1861	Nov	-15.9	19
1861	Dec	-19.8	13
1862	Jan	-20.5	23
1862	Feb	-30.4	11
1862	Mar	-22.1	21
1862	Apr	-17	8
1862	May	-2.7	11
1862	Jun	8.7	69
1862	Jul	8.5	65
1862	Aug	9.6	62
1862	Sep	-0.5	28
1862	Oct	-10.9	36
1862	Nov	-17.9	31
1862	Dec	-33.2	15
1863	Jan	-16.6	45
1863	Feb	-29.9	6
1863	Mar	-20.5	13
1863	Apr	-21.2	6
1863	May	-7.5	10
1863	Jun	10.9	29
1863	Jul	12.5	72
1863	Aug	10	40
1863	Sep	0.8	54
1863	Oct	-15.2	48
1863	Nov	-18.2	22
1863	Dec	-18.6	24
1864	Jan	-19.8	23
1864	Feb	-22.2	15
1864	Mar	-22.1	10
1864	Apr	-16.7	21
1864	May	-1	9
1864	Jun	11.7	7
1864	Jul	10.4	14
1864	Aug	7.5	69
1864	Sep	1	29
1864	Oct	-11.7	31
1864	Nov	-20.5	20
1864	Dec	-24.4	18
1865	Jan	-30.4	11
1865	Feb	-21.2	18
1865	Mar	-26.1	14
1865	Apr	-12.8	15
1865	May	-5.7	20
1865	Jun	11.8	25
1865	Jul	12.5	101
1865	Aug	10	38
1865	Sep	1.3	35
1865	Oct	-12.5	12
1865	Nov	-25.7	15
1865	Dec	-24.8	30
1866	Jan	-30.8	16
1866	Feb	-23.9	20
1866	Mar	-29.5	8
1866	Apr	-16.3	10
1866	May	1.6	14
1866	Jun	11.7	26
1866	Jul	10.1	74
1866	Aug	6.9	52
1866	Sep	-0.5	42
1866	Oct	-14.4	32
1866	Nov	-23.4	25
1866	Dec	-29.7	35
1867	Jan	-19.4	35
1867	Feb	-23.3	26
1867	Mar	-22.8	9
1867	Apr	-10	9
1867	May	-4.4	23
1867	Jun	10.7	32
1867	Jul	12.2	72
1867	Aug	11.8	56
1867	Sep	1.5	45
1867	Oct	-10.9	29
1867	Nov	-21.9	24
1867	Dec	-22.3	39
1868	Jan	-20.4	31
1868	Feb	-34.8	17
1868	Mar	-29.8	3
1868	Apr	-10.3	10
1868	May	-1.9	21
1868	Jun	10.5	36
1868	Jul	9.7	67
1868	Aug	10.3	63
1868	Sep	0.4	35
1868	Oct	-16.8	24
1868	Nov	-23.7	34
1868	Dec	-25.5	26
1869	Jan	-25.5	9
1869	Feb	-25.6	33
1869	Mar	-32.5	4
1869	Apr	-9.4	19
1869	May	-1.8	18
1869	Jun	8.5	81
1869	Jul	12.6	58
1869	Aug	9.3	55
1869	Sep	0.9	61
1869	Oct	-11.1	30
1869	Nov	-24.9	7
1869	Dec	-28	15
1870	Jan	-26.3	7
1870	Feb	-21.8	17
1870	Mar	-21.5	10
1870	Apr	-9.4	8
1870	May	-4.6	17
1870	Jun	6	57
1870	Jul	10.1	62
1870	Aug	8.6	34
1870	Sep	-1.2	40
1870	Oct	-15.2	32
1870	Nov	-26.7	12
1870	Dec	-25.1	14
1871	Jan	-24.2	15
1871	Feb	-25.4	33
1871	Mar	-27.7	11
1871	Apr	-13	18
1871	May	-4.7	36
1871	Jun	7.3	9
1871	Jul	10.9	68
1871	Aug	8.8	37
1871	Sep	1	35
1871	Oct	-7.8	38
1871	Nov	-25.6	18
1871	Dec	-22.9	42
1872	Jan	-16.6	31
1872	Feb	-15.7	18
1872	Mar	-19.7	10
1872	Apr	-9.8	18
1872	May	-3.5	17
1872	Jun	7.1	74
1872	Jul	12	67
1872	Aug	8.2	44
1872	Sep	0.8	40
1872	Oct	-9	28
1872	Nov	-19.4	22
1872	Dec	-26.6	18
1873	Jan	-31.4	8
1873	Feb	-38.3	7
1873	Mar	-32.1	7
1873	Apr	-13.2	18
1873	May	-1.5	23
1873	Jun	11.7	22
1873	Jul	11.9	62
1873	Aug	9.9	25
1873	Sep	-1.9	59
1873	Oct	-14	21
1873	Nov	-25.9	23
1873	Dec	-29.4	17
1874	Jan	-22.4	40
1874	Feb	-26.3	20
1874	Mar	-23.8	8
1874	Apr	-10.6	15
1874	May	-2.4	7
1874	Jun	11.2	68
1874	Jul	13.4	43
1874	Aug	7.4	42
1874	Sep	-3.2	33
1874	Oct	-12.1	45
1874	Nov	-18.2	20
1874	Dec	-27.7	11
1875	Jan	-27.8	14
1875	Feb	-26.2	19
1875	Mar	-27.6	22
1875	Apr	-12	13
1875	May	-5	20
1875	Jun	9.4	58
1875	Jul	10.5	52
1875	Aug	8.4	48
1875	Sep	-2	49
1875	Oct	-15.7	46
1875	Nov	-26.9	21
1875	Dec	-24.9	21
1876	Jan	-27	11
1876	Feb	-21.5	23
1876	Mar	-23	13
1876	Apr	-18.7	8
1876	May	-1.8	36
1876	Jun	9.2	18
1876	Jul	9	41
1876	Aug	9.8	45
1876	Sep	1.5	27
1876	Oct	-10.7	30
1876	Nov	-16.8	15
1876	Dec	-26.2	29
1877	Jan	-32.5	28
1877	Feb	-33.3	23
1877	Mar	-28	13
1877	Apr	-14.9	19
1877	May	0.7	29
1877	Jun	7.7	36
1877	Jul	12.5	46
1877	Aug	8.3	71
1877	Sep	-2.9	38
1877	Oct	-9.2	43
1877	Nov	-22	16
1877	Dec	-24.8	17
1878	Jan	-17.6	20
1878	Feb	-21.6	30
1878	Mar	-28.4	5
1878	Apr	-15.4	16
1878	May	-5.6	11
1878	Jun	10.3	52
1878	Jul	8.6	47
1878	Aug	10.1	43
1878	Sep	0.5	44
1878	Oct	-14.7	22
1878	Nov	-24.4	21
1878	Dec	-22.3	28
1879	Jan	-34.8	9
1879	Feb	-35.9	13
1879	Mar	-20.6	14
1879	Apr	-12	10
1879	May	0.1	22
1879	Jun	12.3	25
1879	Jul	14.3	75
1879	Aug	9.3	44
1879	Sep	1	39
1879	Oct	-13.3	20
1879	Nov	-20.9	26
1879	Dec	-20.9	20
1880	Jan	-23.8	31
1880	Feb	-30.4	2
1880	Mar	-25.3	15
1880	Apr	-7.4	11
1880	May	0.8	19
1880	Jun	10.3	24
1880	Jul	13.3	47
1880	Aug	6.1	66
1880	Sep	-0.4	51
1880	Oct	-10.8	16
1880	Nov	-18.3	30
1880	Dec	-21.7	21
1881	Jan	-26	29
1881	Feb	-33.7	20
1881	Mar	-16.3	15
1881	Apr	-9.5	12
1881	May	-3	11
1881	Jun	9.7	30
1881	Jul	13.2	76
1881	Aug	10.4	52
1881	Sep	1	53
1881	Oct	-9.5	25
1881	Nov	-19.5	21
1881	Dec	-26.4	9
1882	Jan	-23.7	31
1882	Feb	-38.2	13
1882	Mar	-28	12
1882	Apr	-10.7	12
1882	May	-4.3	22
1882	Jun	5.4	46
1882	Jul	9	42
1882	Aug	8.7	60
1882	Sep	-0.4	66
1882	Oct	-16	28
1882	Nov	-24.1	13
1882	Dec	-28.6	33
1883	Jan	-23.3	11
1883	Feb	-23.2	16
1883	Mar	-26	2
1883	Apr	-8.8	9
1883	May	1.8	21
1883	Jun	7.5	95
1883	Jul	7.9	65
1883	Aug	10.4	38
1883	Sep	-2.2	30
1883	Oct	-10.3	30
1883	Nov	-21	35
1883	Dec	-19.1	27
1884	Jan	-20.3	29
1884	Feb	-24.7	36
1884	Mar	-19.8	22
1884	Apr	-18.3	21
1884	May	-3.8	12
1884	Jun	6.7	18
1884	Jul	7.5	93
1884	Aug	10.1	63
1884	Sep	1.3	42
1884	Oct	-18.2	17
1884	Nov	-25.6	23
1884	Dec	-27.6	27
1885	Jan	-36.6	9
1885	Feb	-31	10
1885	Mar	-29.8	5
1885	Apr	-14.9	8
1885	May	-3.8	26
1885	Jun	8.8	21
1885	Jul	11.3	47
1885	Aug	7.3	44
1885	Sep	0.6	38
1885	Oct	-15	29
1885	Nov	-26.8	16
1885	Dec	-24.7	29
1886	Jan	-23.5	27
1886	Feb	-31	17
1886	Mar	-23.2	14
1886	Apr	-14	9
1886	May	-4.8	24
1886	Jun	5.7	74
1886	Jul	9.3	41
1886	Aug	8.2	43
1886	Sep	-0.8	37
1886	Oct	-14.1	34
1886	Nov	-26.9	23
1886	Dec	-28.6	26
1887	Jan	-33.4	7
1887	Feb	-35.9	8
1887	Mar	-30.4	4
1887	Apr	-21.1	14
1887	May	-5.4	35
1887	Jun	4	24
1887	Jul	15.7	60
1887	Aug	5.9	76
1887	Sep	-0.9	33
1887	Oct	-13.8	32
1887	Nov	-21.2	16
1887	Dec	-21.2	22
1888	Jan	-34.6	36
1888	Feb	-26.7	18
1888	Mar	-31.1	19
1888	Apr	-14.3	19
1888	May	-8.8	18
1888	Jun	6.8	9
1888	Jul	15.4	28
1888	Aug	8.9	26
1888	Sep	-3.4	27
1888	Oct	-19.4	34
1888	Nov	-29.4	13
1888	Dec	-32.2	30
1889	Jan	-32	11
1889	Feb	-24.5	37
1889	Mar	-24	15
1889	Apr	-14.5	17
1889	May	-4.3	14
1889	Jun	10.8	48
1889	Jul	10.1	39
1889	Aug	9.4	57
1889	Sep	-0.3	26
1889	Oct	-11.9	15
1889	Nov	-23.9	9
1889	Dec	-23.7	27
1890	Jan	-22	27
1890	Feb	-20.7	26
1890	Mar	-16.6	16
1890	Apr	-9.6	14
1890	May	1.9	8
1890	Jun	12.1	41
1890	Jul	17.4	40
1890	Aug	8.9	31
1890	Sep	2.6	31
1890	Oct	-10.7	38
1890	Nov	-26.9	15
1890	Dec	-33.5	19
1891	Jan	-30.6	21
1891	Feb	-37.9	7
1891	Mar	-31.9	12
1891	Apr	-14.7	20
1891	May	-3.3	25
1891	Jun	10.2	15
1891	Jul	8.6	67
1891	Aug	9.2	35
1891	Sep	-0.5	33
1891	Oct	-18.1	43
1891	Nov	-23.3	28
1891	Dec	-32.3	13
1892	Jan	-27.9	19
1892	Feb	-34	13
1892	Mar	-20.1	24
1892	Apr	-17.1	11
1892	May	-2.4	17
1892	Jun	8.3	28
1892	Jul	8.6	18
1892	Aug	7.3	23
1892	Sep	-0.7	43
1892	Oct	-11.8	32
1892	Nov	-18.8	17
1892	Dec	-30.3	11
1893	Jan	-27.5	14
1893	Feb	-31.7	8
1893	Mar	-31.5	9
1893	Apr	-13.3	20
1893	May	-4.1	15
1893	Jun	5.3	17
1893	Jul	11	59
1893	Aug	8.7	37
1893	Sep	-0.2	42
1893	Oct	-17.9	48
1893	Nov	-27.1	37
1893	Dec	-29.2	37
1894	Jan	-28.8	14
1894	Feb	-29.9	38
1894	Mar	-25.4	21
1894	Apr	-13.6	10
1894	May	-5.1	17
1894	Jun	5.6	45
1894	Jul	11.7	38
1894	Aug	7.2	59
1894	Sep	0.5	38
1894	Oct	-13.8	26
1894	Nov	-21.3	20
1894	Dec	-27	49
1895	Jan	-31.4	9
1895	Feb	-25.2	24
1895	Mar	-21.7	15
1895	Apr	-10.8	14
1895	May	-2.4	16
1895	Jun	12.1	12
1895	Jul	12.2	102
1895	Aug	9.6	61
1895	Sep	2.2	50
1895	Oct	-8.3	39
1895	Nov	-14.3	33
1895	Dec	-23.5	30
1896	Jan	-20.5	18
1896	Feb	-25.6	15
1896	Mar	-20.7	12
1896	Apr	-9.7	11
1896	May	0.5	12
1896	Jun	9	24
1896	Jul	10.6	27
1896	Aug	10.4	45
1896	Sep	0.2	29
1896	Oct	-15.5	19
1896	Nov	-18.5	26
1896	Dec	-24.5	15
1897	Jan	-19.2	10
1897	Feb	-22.8	15
1897	Mar	-24.9	10
1897	Apr	-9.5	17
1897	May	-4.2	17
1897	Jun	12.1	38
1897	Jul	12.4	34
1897	Aug	10.3	65
1897	Sep	2.2	49
1897	Oct	-12.4	21
1897	Nov	-21.3	10
1897	Dec	-28.4	26
1898	Jan	-31.4	22
1898	Feb	-23.8	25
1898	Mar	-24.4	4
1898	Apr	-7.7	5
1898	May	0	20
1898	Jun	11.4	53
1898	Jul	14.9	77
1898	Aug	11.6	30
1898	Sep	1.7	56
1898	Oct	-10.2	26
1898	Nov	-21.6	37
1898	Dec	-26	23
1899	Jan	-32.6	30
1899	Feb	-27.6	26
1899	Mar	-23.6	17
1899	Apr	-9	10
1899	May	0.6	16
1899	Jun	8.8	8
1899	Jul	8.1	67
1899	Aug	7.8	59
1899	Sep	0.4	33
1899	Oct	-13.9	22
1899	Nov	-17.7	36
1899	Dec	-20	20
1900	Jan	-28.7	16
1900	Feb	-28	17
1900	Mar	-29.9	17
1900	Apr	-21	8
1900	May	-3.2	22
1900	Jun	10.8	43
1900	Jul	11.5	68
1900	Aug	6.8	59
1900	Sep	-2.9	36
1900	Oct	-10.5	37
1900	Nov	-26.5	9
1900	Dec	-32.7	7

## Sheet: NS_Location1_cccma_1850-2000_te
Year	Month	Temperature_C	Precipitation_mm
1850	Jan	-33.6	5
1850	Feb	-28.8	19
1850	Mar	-23.3	9
1850	Apr	-18	13
1850	May	-1.3	8
1850	Jun	8.5	20
1850	Jul	9.4	52
1850	Aug	9.6	63
1850	Sep	0.1	46
1850	Oct	-11.4	61
1850	Nov	-23.5	9
1850	Dec	-28.1	16
1851	Jan	-24.8	20
1851	Feb	-30.8	13
1851	Mar	-27.7	9
1851	Apr	-11.2	12
1851	May	-4.5	6
1851	Jun	6.9	36
1851	Jul	7.1	58
1851	Aug	4.2	83
1851	Sep	-0.5	16
1851	Oct	-10.6	23
1851	Nov	-19.6	24
1851	Dec	-33.8	11
1852	Jan	-34	9
1852	Feb	-36.8	5
1852	Mar	-33.5	4
1852	Apr	-14.2	16
1852	May	-3.3	17
1852	Jun	8.8	44
1852	Jul	9.7	29
1852	Aug	6.9	32
1852	Sep	-1.8	18
1852	Oct	-12.1	33
1852	Nov	-27	24
1852	Dec	-36.6	13
1853	Jan	-36.5	6
1853	Feb	-32.7	12
1853	Mar	-20.8	12
1853	Apr	-13	15
1853	May	-0.4	20
1853	Jun	8.8	22
1853	Jul	9.6	50
1853	Aug	6.5	46
1853	Sep	-3	30
1853	Oct	-15.4	21
1853	Nov	-23.5	25
1853	Dec	-27.5	24
1854	Jan	-21.3	19
1854	Feb	-33.1	7
1854	Mar	-23.2	20
1854	Apr	-12.3	10
1854	May	0.3	10
1854	Jun	5	76
1854	Jul	10.9	37
1854	Aug	8.5	63
1854	Sep	-5	60
1854	Oct	-19.3	19
1854	Nov	-28.2	22
1854	Dec	-35.9	8
1855	Jan	-33.4	5
1855	Feb	-21.9	14
1855	Mar	-27.4	5
1855	Apr	-11.1	9
1855	May	-1	16
1855	Jun	8.2	38
1855	Jul	12.7	47
1855	Aug	7.5	35
1855	Sep	-4.6	22
1855	Oct	-16.5	31
1855	Nov	-29.3	17
1855	Dec	-34.8	19
1856	Jan	-25.4	19
1856	Feb	-31.3	14
1856	Mar	-23.9	9
1856	Apr	-10.6	6
1856	May	0.8	14
1856	Jun	10	50
1856	Jul	9.4	53
1856	Aug	4.5	63
1856	Sep	-0.9	42
1856	Oct	-12.7	23
1856	Nov	-21.4	14
1856	Dec	-35.5	7
1857	Jan	-35.4	15
1857	Feb	-33.1	29
1857	Mar	-24.7	17
1857	Apr	-14.2	8
1857	May	-0.2	9
1857	Jun	7.2	58
1857	Jul	9.2	79
1857	Aug	4.7	44
1857	Sep	-0.4	20
1857	Oct	-9.9	35
1857	Nov	-24.5	18
1857	Dec	-29.7	37
1858	Jan	-34.6	10
1858	Feb	-23.7	18
1858	Mar	-30.1	10
1858	Apr	-10.8	8
1858	May	-2.8	16
1858	Jun	9.3	41
1858	Jul	8.8	44
1858	Aug	6.7	50
1858	Sep	1.3	47
1858	Oct	-7	63
1858	Nov	-27	16
1858	Dec	-30.8	39
1859	Jan	-20	31
1859	Feb	-34.7	11
1859	Mar	-27.2	10
1859	Apr	-16.9	10
1859	May	1.8	9
1859	Jun	7	41
1859	Jul	11.1	31
1859	Aug	6.4	48
1859	Sep	-0.3	34
1859	Oct	-11.5	43
1859	Nov	-23.8	31
1859	Dec	-26.1	22
1860	Jan	-18.5	28
1860	Feb	-29.8	3
1860	Mar	-23.4	17
1860	Apr	-11.4	11
1860	May	-1.1	14
1860	Jun	8.2	22
1860	Jul	11.5	53
1860	Aug	10	47
1860	Sep	-1.5	16
1860	Oct	-13.7	27
1860	Nov	-25.1	11
1860	Dec	-25.2	31
1861	Jan	-24.4	34
1861	Feb	-27.3	19
1861	Mar	-26.9	14
1861	Apr	-13.9	11
1861	May	-1	17
1861	Jun	7	34
1861	Jul	11.8	41
1861	Aug	8.2	59
1861	Sep	3.1	54
1861	Oct	-11.6	39
1861	Nov	-23.9	18
1861	Dec	-33.3	17
1862	Jan	-27.3	16
1862	Feb	-38.7	8
1862	Mar	-23.6	7
1862	Apr	-18.5	9
1862	May	-1.3	17
1862	Jun	8.3	35
1862	Jul	11.9	61
1862	Aug	6.2	54
1862	Sep	2	36
1862	Oct	-11.6	32
1862	Nov	-17.3	21
1862	Dec	-28.5	35
1863	Jan	-32.6	6
1863	Feb	-24.9	32
1863	Mar	-24.2	12
1863	Apr	-12.5	12
1863	May	-3.8	11
1863	Jun	7.1	27
1863	Jul	9.4	81
1863	Aug	5.3	74
1863	Sep	0.5	75
1863	Oct	-10.3	27
1863	Nov	-17.7	34
1863	Dec	-35.5	12
1864	Jan	-25	23
1864	Feb	-22.6	22
1864	Mar	-24.8	6
1864	Apr	-13.3	6
1864	May	-2.3	16
1864	Jun	6	32
1864	Jul	8.8	42
1864	Aug	3.5	43
1864	Sep	-0.1	38
1864	Oct	-9.5	31
1864	Nov	-19.3	14
1864	Dec	-35.6	14
1865	Jan	-29.2	13
1865	Feb	-29.4	19
1865	Mar	-26.3	15
1865	Apr	-18.3	3
1865	May	-4	14
1865	Jun	8.4	32
1865	Jul	9.9	45
1865	Aug	8.7	75
1865	Sep	-1	43
1865	Oct	-14.1	16
1865	Nov	-22.3	35
1865	Dec	-28.7	21
1866	Jan	-32.2	7
1866	Feb	-31.3	15
1866	Mar	-31.8	6
1866	Apr	-12	22
1866	May	0.2	18
1866	Jun	7.5	37
1866	Jul	11	55
1866	Aug	7.6	46
1866	Sep	-5.6	32
1866	Oct	-18.4	16
1866	Nov	-21.3	24
1866	Dec	-35.1	17
1867	Jan	-22.3	23
1867	Feb	-36	6
1867	Mar	-25.9	7
1867	Apr	-8.9	7
1867	May	-2.5	34
1867	Jun	7.9	28
1867	Jul	12.3	36
1867	Aug	9.2	38
1867	Sep	-3.5	54
1867	Oct	-10.9	42
1867	Nov	-16.6	18
1867	Dec	-32.6	15
1868	Jan	-25.6	14
1868	Feb	-22.4	32
1868	Mar	-27.7	10
1868	Apr	-18	22
1868	May	-2.5	6
1868	Jun	10.2	41
1868	Jul	10.8	49
1868	Aug	7.4	60
1868	Sep	0.6	36
1868	Oct	-9.5	19
1868	Nov	-28.1	15
1868	Dec	-26.8	19
1869	Jan	-32.4	11
1869	Feb	-31.6	17
1869	Mar	-24.6	19
1869	Apr	-17.3	6
1869	May	-3.5	23
1869	Jun	9.7	37
1869	Jul	11.9	70
1869	Aug	5.5	42
1869	Sep	0.4	35
1869	Oct	-11.3	17
1869	Nov	-19.5	30
1869	Dec	-28.9	16
1870	Jan	-31.5	12
1870	Feb	-22	9
1870	Mar	-29.3	9
1870	Apr	-18.4	11
1870	May	-8.3	11
1870	Jun	8.2	44
1870	Jul	9.1	51
1870	Aug	8.4	50
1870	Sep	-5.2	25
1870	Oct	-13.8	18
1870	Nov	-25	27
1870	Dec	-36.7	17
1871	Jan	-26.3	7
1871	Feb	-26.6	10
1871	Mar	-27.9	5
1871	Apr	-12.2	7
1871	May	-2.8	24
1871	Jun	8.3	29
1871	Jul	8.8	45
1871	Aug	9.1	40
1871	Sep	2.3	54
1871	Oct	-10.1	44
1871	Nov	-23.9	19
1871	Dec	-28.8	23
1872	Jan	-21.1	46
1872	Feb	-35.3	10
1872	Mar	-24.8	13
1872	Apr	-11.8	9
1872	May	-3.7	14
1872	Jun	9.3	36
1872	Jul	9.7	48
1872	Aug	7.6	61
1872	Sep	0.4	34
1872	Oct	-10.5	28
1872	Nov	-18.8	21
1872	Dec	-29.7	20
1873	Jan	-21.1	23
1873	Feb	-30	12
1873	Mar	-27.1	19
1873	Apr	-13.6	8
1873	May	-0.3	6
1873	Jun	7.1	44
1873	Jul	9.8	41
1873	Aug	6.6	53
1873	Sep	1	31
1873	Oct	-8.5	16
1873	Nov	-21.9	38
1873	Dec	-38	9
1874	Jan	-23.1	18
1874	Feb	-24.8	34
1874	Mar	-32.1	6
1874	Apr	-14.2	4
1874	May	-2.6	8
1874	Jun	8.1	24
1874	Jul	10.5	62
1874	Aug	6.2	50
1874	Sep	-1.2	32
1874	Oct	-10.2	26
1874	Nov	-15	50
1874	Dec	-30.5	11
1875	Jan	-19.8	14
1875	Feb	-27	14
1875	Mar	-27	7
1875	Apr	-11.3	16
1875	May	-5.2	11
1875	Jun	8.2	42
1875	Jul	8.8	54
1875	Aug	7.6	29
1875	Sep	-1.7	17
1875	Oct	-12	24
1875	Nov	-29.5	24
1875	Dec	-29.2	22
1876	Jan	-27.3	7
1876	Feb	-25	8
1876	Mar	-29.5	7
1876	Apr	-14	15
1876	May	0.3	11
1876	Jun	6.9	49
1876	Jul	9.9	65
1876	Aug	8.7	47
1876	Sep	-0.3	50
1876	Oct	-13.5	17
1876	Nov	-24.4	16
1876	Dec	-32	43
1877	Jan	-32.3	16
1877	Feb	-21.6	16
1877	Mar	-28.5	6
1877	Apr	-11.9	12
1877	May	-4.3	17
1877	Jun	7.8	23
1877	Jul	9.1	66
1877	Aug	8.6	43
1877	Sep	-1.4	37
1877	Oct	-16.6	26
1877	Nov	-24.9	26
1877	Dec	-35.6	9
1878	Jan	-24.2	21
1878	Feb	-40	8
1878	Mar	-22.2	10
1878	Apr	-16.4	10
1878	May	-1.5	20
1878	Jun	8.2	44
1878	Jul	8.2	61
1878	Aug	2.7	69
1878	Sep	-3	22
1878	Oct	-13	21
1878	Nov	-22.6	15
1878	Dec	-33.3	17
1879	Jan	-21	12
1879	Feb	-26.4	15
1879	Mar	-26.2	7
1879	Apr	-18.3	7
1879	May	-4.3	10
1879	Jun	7.4	54
1879	Jul	10.1	45
1879	Aug	8.4	39
1879	Sep	-1.8	17
1879	Oct	-14.7	22
1879	Nov	-22.6	25
1879	Dec	-33.8	20
1880	Jan	-21.4	42
1880	Feb	-37.1	15
1880	Mar	-23.9	13
1880	Apr	-15.9	7
1880	May	-2.3	5
1880	Jun	9.8	30
1880	Jul	10.3	62
1880	Aug	4	78
1880	Sep	3.2	32
1880	Oct	-8.8	36
1880	Nov	-20	16
1880	Dec	-26.1	15
1881	Jan	-28.4	16
1881	Feb	-28.4	20
1881	Mar	-32.5	13
1881	Apr	-13.4	7
1881	May	-0.3	18
1881	Jun	6.8	58
1881	Jul	9	45
1881	Aug	9.3	34
1881	Sep	0.7	27
1881	Oct	-13.6	21
1881	Nov	-15.9	19
1881	Dec	-25.2	15
1882	Jan	-22.7	11
1882	Feb	-25.4	14
1882	Mar	-24	10
1882	Apr	-9.6	9
1882	May	-1.3	22
1882	Jun	8	40
1882	Jul	9.1	69
1882	Aug	7	60
1882	Sep	-2.7	52
1882	Oct	-15	22
1882	Nov	-27.2	21
1882	Dec	-33.6	14
1883	Jan	-20.6	37
1883	Feb	-32.7	16
1883	Mar	-21.1	15
1883	Apr	-12.6	11
1883	May	-1.7	17
1883	Jun	7.8	54
1883	Jul	10.9	61
1883	Aug	8.1	50
1883	Sep	-2	29
1883	Oct	-15.4	26
1883	Nov	-21.2	26
1883	Dec	-27.6	17
1884	Jan	-31.9	8
1884	Feb	-26.7	12
1884	Mar	-20.6	7
1884	Apr	-14.6	12
1884	May	-6.6	17
1884	Jun	9.6	33
1884	Jul	12.1	50
1884	Aug	9.4	64
1884	Sep	-0.7	30
1884	Oct	-11.6	42
1884	Nov	-23.4	28
1884	Dec	-18.4	30
1885	Jan	-21.4	32
1885	Feb	-34.6	11
1885	Mar	-28.1	6
1885	Apr	-14.9	12
1885	May	-1.5	40
1885	Jun	9.3	30
1885	Jul	12.7	49
1885	Aug	6.8	81
1885	Sep	-0.9	47
1885	Oct	-8.8	33
1885	Nov	-19.2	17
1885	Dec	-28.6	35
1886	Jan	-29.8	30
1886	Feb	-28.7	16
1886	Mar	-25	7
1886	Apr	-14.2	25
1886	May	-1.6	18
1886	Jun	9.1	29
1886	Jul	10.3	57
1886	Aug	6	42
1886	Sep	-0.4	25
1886	Oct	-18.7	14
1886	Nov	-24.6	21
1886	Dec	-26.4	26
1887	Jan	-29.1	9
1887	Feb	-37.6	4
1887	Mar	-33.4	9
1887	Apr	-15.3	14
1887	May	-6.3	14
1887	Jun	9	43
1887	Jul	9.3	66
1887	Aug	9.4	59
1887	Sep	1	56
1887	Oct	-7	41
1887	Nov	-24.4	18
1887	Dec	-25.6	19
1888	Jan	-19.7	21
1888	Feb	-23.7	7
1888	Mar	-22.3	13
1888	Apr	-11.8	12
1888	May	-3.3	16
1888	Jun	7.4	39
1888	Jul	7.8	35
1888	Aug	7.2	26
1888	Sep	1.5	47
1888	Oct	-13.4	49
1888	Nov	-23.1	24
1888	Dec	-35.2	9
1889	Jan	-35.7	7
1889	Feb	-23.2	4
1889	Mar	-25	10
1889	Apr	-13.2	20
1889	May	-2.2	15
1889	Jun	6.9	39
1889	Jul	9.1	41
1889	Aug	5.3	52
1889	Sep	-0.9	63
1889	Oct	-12	34
1889	Nov	-22.4	16
1889	Dec	-22.4	27
1890	Jan	-30.6	19
1890	Feb	-25.9	19
1890	Mar	-28.5	16
1890	Apr	-16.3	6
1890	May	-1.4	17
1890	Jun	10.4	36
1890	Jul	11.8	38
1890	Aug	6.8	50
1890	Sep	-2.4	50
1890	Oct	-11.4	20
1890	Nov	-28.5	11
1890	Dec	-32.8	17
1891	Jan	-22.3	20
1891	Feb	-29.5	33
1891	Mar	-22.2	13
1891	Apr	-13.4	9
1891	May	-4.1	14
1891	Jun	8.2	29
1891	Jul	8.2	57
1891	Aug	7.3	52
1891	Sep	-0.2	69
1891	Oct	-14.7	25
1891	Nov	-17.1	33
1891	Dec	-29.3	15
1892	Jan	-33.7	4
1892	Feb	-33.9	10
1892	Mar	-18.8	9
1892	Apr	-14.8	6
1892	May	-2.5	12
1892	Jun	8.6	19
1892	Jul	12	64
1892	Aug	3.8	98
1892	Sep	-1.7	32
1892	Oct	-12.1	28
1892	Nov	-21.8	33
1892	Dec	-25.1	29
1893	Jan	-22.2	14
1893	Feb	-31	19
1893	Mar	-20.9	15
1893	Apr	-15.5	10
1893	May	-4.6	23
1893	Jun	8.9	20
1893	Jul	10.6	42
1893	Aug	9	38
1893	Sep	1.8	34
1893	Oct	-11.4	18
1893	Nov	-22.5	30
1893	Dec	-26.9	34
1894	Jan	-20.9	18
1894	Feb	-31.8	12
1894	Mar	-28.5	3
1894	Apr	-14.5	6
1894	May	-2.4	9
1894	Jun	8.1	38
1894	Jul	14	42
1894	Aug	8.1	63
1894	Sep	-4.9	36
1894	Oct	-17.9	20
1894	Nov	-24.4	25
1894	Dec	-25.5	25
1895	Jan	-20.4	22
1895	Feb	-31	9
1895	Mar	-22.6	26
1895	Apr	-8.3	9
1895	May	-1.1	22
1895	Jun	9.8	29
1895	Jul	9.6	79
1895	Aug	7.6	45
1895	Sep	-0.2	44
1895	Oct	-9.4	70
1895	Nov	-18.9	26
1895	Dec	-29.2	14
1896	Jan	-19.3	19
1896	Feb	-20.1	22
1896	Mar	-25.6	13
1896	Apr	-9.3	10
1896	May	-4	33
1896	Jun	5.6	56
1896	Jul	9.2	46
1896	Aug	10	52
1896	Sep	2	50
1896	Oct	-11.9	43
1896	Nov	-15.6	20
1896	Dec	-28.5	15
1897	Jan	-22.4	27
1897	Feb	-36.7	13
1897	Mar	-20.6	23
1897	Apr	-11.7	13
1897	May	-5.3	29
1897	Jun	7	44
1897	Jul	12.4	32
1897	Aug	9.6	55
1897	Sep	1.6	41
1897	Oct	-16.1	25
1897	Nov	-18.1	20
1897	Dec	-29.4	21
1898	Jan	-28.4	10
1898	Feb	-34.9	19
1898	Mar	-21.4	12
1898	Apr	-11.4	11
1898	May	-0.1	21
1898	Jun	7.2	49
1898	Jul	9.9	67
1898	Aug	7.7	71
1898	Sep	-0.4	40
1898	Oct	-13.6	37
1898	Nov	-20.9	40
1898	Dec	-25.9	23
1899	Jan	-35.3	7
1899	Feb	-34.7	9
1899	Mar	-18.5	18
1899	Apr	-12.8	11
1899	May	-1	13
1899	Jun	8.8	39
1899	Jul	12.8	54
1899	Aug	9.1	58
1899	Sep	-2.9	14
1899	Oct	-14.9	33
1899	Nov	-27.4	9
1899	Dec	-27.5	36
1900	Jan	-21.1	18
1900	Feb	-30.7	29
1900	Mar	-29.3	7
1900	Apr	-16.7	4
1900	May	0.2	21
1900	Jun	9	41
1900	Jul	10.7	39
1900	Aug	7.9	63
1900	Sep	-3.4	35
1900	Oct	-15.6	47
1900	Nov	-26.2	26
1900	Dec	-29.9	19
